# Supplementary material for: Assembly of neuron- and radial glial-cell-derived extracellular matrix molecules promotes radial migration of developing cortical neurons
Source: eLife journal article supplement (doi:10.7554/elife.92342), 2023-11-09
Supplement: fig1-data1 [file Numerical source data for Figure 1.xlsx]

## Sheet: Fig1 f
Developmental stage	Type	Relative Expression
E13.5	Full	0.23358
E13.5	N	0.492673
E13.5	Full	0.142341
E13.5	N	0.344149
E13.5	Full	0.149806
E13.5	N	0.271986
E16.5	Full	0.428187
E16.5	N	0.488519
E16.5	Full	0.443502
E16.5	N	0.515161
E16.5	Full	0.457275
E16.5	N	0.540746
E18.5	Full	0.888998
E18.5	N	0.798947
E18.5	Full	0.784178
E18.5	N	0.71851
E18.5	Full	0.822699
E18.5	N	0.699805
P2	Full	1.09597
P2	N	0.865773
P2	Full	1.17568
P2	N	1.38807
P2	Full	0.728344
P2	N	0.746161
P42	Full	0.0387999
P42	N	0.584003
P42	Full	0.017127
P42	N	0.345243
P42	Full	0.00936946
P42	N	0.263934

## Sheet: Fig1 g
Developmental stage	Relative Expression
E13.5	0.043943
E13.5	0.0353965
E13.5	0.0380146
E16.5	0.0484651
E16.5	0.0576542
E16.5	0.0572377
E18.5	0.0536081
E18.5	0.0632261
E18.5	0.0349758
P2	0.0125885
P2	0.0103044
P2	0.0163781
P40	0.00109127
P40	0.000779788
P40	0.0011495

## Sheet: Fig1 j
Days after labeling	Relative Expression
0.6_1	0.0229
0.6_2	0.0176
0.6_3	0.0156
2_1	0.065
2_2	0.0695
2_3	0.072
3_1	0.0283
3_2	0.0569
3_3	0.0637
4_1	0.0671
4_2	0.0421
4_3	0.0385
