# Supplementary material for: Assembly of neuron- and radial glial-cell-derived extracellular matrix molecules promotes radial migration of developing cortical neurons
Source: eLife journal article supplement (doi:10.7554/elife.92342), 2023-11-09
Supplement: fig2-figsupp1-data1 [file Numerical source data for Figure 2-figure supplement 1.xlsx]

## Sheet: Fig2 supp1 b
Type	Full	Full	Full	N	N	N	C	C	C	NC	NC
ng/mL	42.7235	29.0043	38.804	65.6412	41.7391	49.2185	18.1821	0.831052	8.9453	-2.12703	-8.03579
