# Supplementary material for: Assembly of neuron- and radial glial-cell-derived extracellular matrix molecules promotes radial migration of developing cortical neurons
Source: eLife journal article supplement (doi:10.7554/elife.92342), 2023-11-09
Supplement: fig3-data1 [file Numerical source data for Figure 3.xlsx]

## Sheet: Fig3 d
Developmental stage	Relative Expression
E13.5	0.0896783
E13.5	0.0497022
E13.5	0.0595762
E16.5	0.917706
E16.5	1.24398
E16.5	0.00510694
E18.5	1.37351
E18.5	1.36156
E18.5	0.00283261
P2	0.00619239
P2	0.00521762
P2	0.00705935
P40	0.000293608
P40	9.70849e-05
P40	1.2222e-05

## Sheet: Fig 3 e
Developmental stage	Relative Expression
E13.5	0.0171115
E13.5	0.0107823
E13.5	0.0110173
E16.5	0.381788
E16.5	0.501995
E16.5	0.423598
E18.5	1.10308
E18.5	0.866868
E18.5	1.03005
P2	0.74532
P2	1.30162
P2	0.802719
P42	0.00862347
P42	0.00877101
P42	0.00398299
