# Supplementary material for: Assembly of neuron- and radial glial-cell-derived extracellular matrix molecules promotes radial migration of developing cortical neurons
Source: eLife journal article supplement (doi:10.7554/elife.92342), 2023-11-09
Supplement: fig6-data1 [file Numerical source data for Figure 6.xlsx]

## Sheet: Fig6 b
Type	mouse	Bin	percent
Control	1	1	0
Control	1	2	10.2362
Control	1	3	29.1339
Control	1	4	30.315
Control	1	5	30.315
Control	2	1	0
Control	2	2	11.6981
Control	2	3	35.0943
Control	2	4	28.3019
Control	2	5	24.9057
Control	3	1	0
Control	3	2	7.77027
Control	3	3	33.7838
Control	3	4	27.027
Control	3	5	31.4189
Control	4	1	0
Control	4	2	3.82514
Control	4	3	31.694
Control	4	4	27.8689
Control	4	5	36.612
Control	5	1	7.57576
Control	5	2	20.8333
Control	5	3	19.697
Control	5	4	26.1364
Control	5	5	25.7576
Control	6	1	17.3585
Control	6	2	22.2642
Control	6	3	22.6415
Control	6	4	24.5283
Control	6	5	13.2075
Control	7	1	15.534
Control	7	2	34.9515
Control	7	3	28.1553
Control	7	4	12.1359
Control	7	5	9.2233
Control	8	1	2.22222
Control	8	2	20
Control	8	3	29.3333
Control	8	4	24.4444
Control	8	5	24
Control	9	1	0.502513
Control	9	2	14.5729
Control	9	3	34.1709
Control	9	4	31.1558
Control	9	5	19.598
Control	10	1	0
Control	10	2	7.54717
Control	10	3	39.6226
Control	10	4	33.9623
Control	10	5	18.8679
Control	11	1	0.497512
Control	11	2	24.8756
Control	11	3	35.8209
Control	11	4	23.3831
Control	11	5	15.4229
Control	12	1	20.4861
Control	12	2	29.5139
Control	12	3	30.2083
Control	12	4	14.5833
Control	12	5	5.20833
Control	13	1	2.88066
Control	13	2	17.6955
Control	13	3	39.0947
Control	13	4	19.7531
Control	13	5	20.5761
Control	14	1	20.7547
Control	14	2	24.0566
Control	14	3	21.6981
Control	14	4	19.3396
Control	14	5	14.1509
Control	15	1	1.25786
Control	15	2	18.239
Control	15	3	49.0566
Control	15	4	23.2704
Control	15	5	8.1761
Control	16	1	13.5965
Control	16	2	21.4912
Control	16	3	21.4912
Control	16	4	23.2456
Control	16	5	20.1754
Control	17	1	1.89573
Control	17	2	17.5355
Control	17	3	33.1754
Control	17	4	23.6967
Control	17	5	23.6967
Control	18	1	6.94981
Control	18	2	30.888
Control	18	3	29.3436
Control	18	4	14.2857
Control	18	5	18.5328
Control	19	1	5.90909
Control	19	2	23.6364
Control	19	3	30
Control	19	4	25.4545
Control	19	5	15
Control	20	1	5.04202
Control	20	2	21.4286
Control	20	3	29.4118
Control	20	4	20.1681
Control	20	5	23.9496
DKO	1	1	0
DKO	1	2	0.760456
DKO	1	3	30.4183
DKO	1	4	45.6274
DKO	1	5	23.1939
DKO	2	1	0
DKO	2	2	0.675676
DKO	2	3	23.6486
DKO	2	4	46.2838
DKO	2	5	29.3919
DKO	3	1	0
DKO	3	2	4.87805
DKO	3	3	35.3659
DKO	3	4	34.9593
DKO	3	5	24.7967
DKO	4	1	0
DKO	4	2	0
DKO	4	3	15.3226
DKO	4	4	43.5484
DKO	4	5	41.129
DKO	5	1	3.36538
DKO	5	2	21.6346
DKO	5	3	29.8077
DKO	5	4	25.4808
DKO	5	5	19.7115
DKO	6	1	0
DKO	6	2	12.5
DKO	6	3	38.0208
DKO	6	4	21.3542
DKO	6	5	28.125
DKO	7	1	1.51515
DKO	7	2	15.1515
DKO	7	3	37.8788
DKO	7	4	18.6869
DKO	7	5	26.7677
DKO	8	1	1.27119
DKO	8	2	15.2542
DKO	8	3	36.0169
DKO	8	4	19.9153
DKO	8	5	27.5424
DKO	9	1	0
DKO	9	2	0
DKO	9	3	26.7974
DKO	9	4	52.9412
DKO	9	5	20.2614
DKO	10	1	0
DKO	10	2	0
DKO	10	3	30.0813
DKO	10	4	47.9675
DKO	10	5	21.9512
DKO	11	1	0
DKO	11	2	2.64901
DKO	11	3	30.4636
DKO	11	4	33.7748
DKO	11	5	33.1126
DKO	12	1	0
DKO	12	2	0.657895
DKO	12	3	25
DKO	12	4	40.7895
DKO	12	5	33.5526
DKO	13	1	0
DKO	13	2	0
DKO	13	3	4.87805
DKO	13	4	64.0244
DKO	13	5	31.0976
DKO	14	1	0
DKO	14	2	5.02283
DKO	14	3	35.6164
DKO	14	4	31.5068
DKO	14	5	27.8539
DKO	15	1	0
DKO	15	2	0
DKO	15	3	2.29885
DKO	15	4	51.7241
DKO	15	5	45.977
DKO	16	1	0
DKO	16	2	1.11111
DKO	16	3	17.7778
DKO	16	4	52.7778
DKO	16	5	28.3333
DKO	17	1	0
DKO	17	2	0.5
DKO	17	3	7.5
DKO	17	4	64
DKO	17	5	28
DKO	18	1	2.51256
DKO	18	2	23.1156
DKO	18	3	36.1809
DKO	18	4	21.608
DKO	18	5	16.5829
DKO	19	1	1.49254
DKO	19	2	26.3682
DKO	19	3	36.8159
DKO	19	4	17.4129
DKO	19	5	17.9104
DKO	20	1	0
DKO	20	2	20.9091
DKO	20	3	38.6364
DKO	20	4	23.6364
DKO	20	5	16.8182

## Sheet: Fig6 c
Type	mouse	Bin	percent
Control	1	1	49.6454
Control	1	2	24.8227
Control	1	3	6.38298
Control	1	4	14.8936
Control	1	5	4.25532
Control	2	1	45.4545
Control	2	2	6.61157
Control	2	3	8.26446
Control	2	4	23.9669
Control	2	5	15.7025
Control	3	1	49.6183
Control	3	2	13.7405
Control	3	3	10.687
Control	3	4	18.3206
Control	3	5	7.63359
Control	4	1	23.8494
Control	4	2	17.5732
Control	4	3	25.523
Control	4	4	18.41
Control	4	5	14.6444
Control	5	1	42.6036
Control	5	2	5.32544
Control	5	3	14.7929
Control	5	4	23.0769
Control	5	5	14.2012
Control	6	1	57.8313
Control	6	2	9.63855
Control	6	3	9.63855
Control	6	4	18.0723
Control	6	5	4.81928
Control	7	1	30.9278
Control	7	2	10.3093
Control	7	3	41.2371
Control	7	4	14.433
Control	7	5	3.09278
Control	8	1	39.7059
Control	8	2	8.82353
Control	8	3	11.7647
Control	8	4	25.7353
Control	8	5	13.9706
Control	9	1	26.6272
Control	9	2	28.9941
Control	9	3	21.8935
Control	9	4	13.6095
Control	9	5	8.87574
Control	10	1	33.0935
Control	10	2	15.1079
Control	10	3	14.3885
Control	10	4	19.4245
Control	10	5	17.9856
Control	11	1	39.0977
Control	11	2	14.2857
Control	11	3	18.797
Control	11	4	21.0526
Control	11	5	6.76692
Control	12	1	39.2593
Control	12	2	25.9259
Control	12	3	17.7778
Control	12	4	9.62963
Control	12	5	7.40741
Control	13	1	40.708
Control	13	2	10.6195
Control	13	3	30.9735
Control	13	4	15.9292
Control	13	5	1.76991
Control	14	1	39.3258
Control	14	2	26.9663
Control	14	3	10.1124
Control	14	4	19.1011
Control	14	5	4.49438
Control	15	1	40.411
Control	15	2	14.3836
Control	15	3	17.1233
Control	15	4	21.9178
Control	15	5	6.16438
Control	16	1	35.7576
Control	16	2	17.5758
Control	16	3	11.5152
Control	16	4	21.8182
Control	16	5	13.3333
Control	17	1	52.349
Control	17	2	7.38255
Control	17	3	9.39597
Control	17	4	25.5034
Control	17	5	5.36913
Control	18	1	40.2778
Control	18	2	5.55556
Control	18	3	9.72222
Control	18	4	27.0833
Control	18	5	17.3611
Control	19	1	34.9112
Control	19	2	4.73373
Control	19	3	15.9763
Control	19	4	25.4438
Control	19	5	18.9349
DKO	20	1	0.920245
DKO	20	2	9.20245
DKO	20	3	47.8528
DKO	20	4	22.0859
DKO	20	5	19.9387
DKO	1	1	0
DKO	1	2	6.25
DKO	1	3	26.9231
DKO	1	4	41.8269
DKO	1	5	25
DKO	2	1	1.06952
DKO	2	2	17.1123
DKO	2	3	42.7807
DKO	2	4	24.5989
DKO	2	5	14.4385
DKO	3	1	1.25786
DKO	3	2	17.6101
DKO	3	3	39.6226
DKO	3	4	22.6415
DKO	3	5	18.8679
DKO	4	1	36.9369
DKO	4	2	13.5135
DKO	4	3	6.30631
DKO	4	4	21.6216
DKO	4	5	21.6216
DKO	5	1	35.4545
DKO	5	2	24.5455
DKO	5	3	10
DKO	5	4	20
DKO	5	5	10
DKO	6	1	38.8889
DKO	6	2	19.4444
DKO	6	3	9.02778
DKO	6	4	18.75
DKO	6	5	13.8889
DKO	7	1	32.716
DKO	7	2	23.4568
DKO	7	3	4.93827
DKO	7	4	22.2222
DKO	7	5	16.6667
DKO	8	1	9.04523
DKO	8	2	30.6533
DKO	8	3	25.6281
DKO	8	4	18.0905
DKO	8	5	16.5829
DKO	9	1	31.5789
DKO	9	2	19.0789
DKO	9	3	4.60526
DKO	9	4	26.3158
DKO	9	5	18.4211
DKO	10	1	32
DKO	10	2	24
DKO	10	3	13.6
DKO	10	4	16
DKO	10	5	14.4
DKO	11	1	38.9474
DKO	11	2	13.6842
DKO	11	3	8.42105
DKO	11	4	17.8947
DKO	11	5	21.0526
DKO	12	1	16.5289
DKO	12	2	26.4463
DKO	12	3	11.5702
DKO	12	4	23.9669
DKO	12	5	21.4876
DKO	13	1	5.78947
DKO	13	2	19.4737
DKO	13	3	30.5263
DKO	13	4	28.4211
DKO	13	5	15.7895
DKO	14	1	0
DKO	14	2	10.4478
DKO	14	3	34.8259
DKO	14	4	33.3333
DKO	14	5	21.393
DKO	15	1	4.86486
DKO	15	2	22.1622
DKO	15	3	33.5135
DKO	15	4	27.027
DKO	15	5	12.4324
DKO	16	1	1.86916
DKO	16	2	12.6168
DKO	16	3	33.1776
DKO	16	4	36.4486
DKO	16	5	15.8879
DKO	17	1	40.3727
DKO	17	2	29.1925
DKO	17	3	9.93789
DKO	17	4	14.9068
DKO	17	5	5.59006
DKO	18	1	36.8056
DKO	18	2	12.5
DKO	18	3	17.3611
DKO	18	4	18.0556
DKO	18	5	15.2778
DKO	19	1	22.0264
DKO	19	2	25.9912
DKO	19	3	21.1454
DKO	19	4	18.5022
DKO	19	5	12.3348
