# Supplementary material for: Assembly of neuron- and radial glial-cell-derived extracellular matrix molecules promotes radial migration of developing cortical neurons
Source: eLife journal article supplement (doi:10.7554/elife.92342), 2023-11-09
Supplement: fig6-figsupp1-data1 [file Numerical source data for Figure 6-figure supplement 1.xlsx]

## Sheet: Fig 6 supp 1 c
Type	Cerebrum weight (g)
WT	0.0366
WT	0.035
WT	0.0339
WT	0.0328
WT	0.0308
DKO	0.0368
DKO	0.0313
DKO	0.0335
DKO	0.033
DKO	0.0337
