# Supplementary material for: Assembly of neuron- and radial glial-cell-derived extracellular matrix molecules promotes radial migration of developing cortical neurons
Source: eLife journal article supplement (doi:10.7554/elife.92342), 2023-11-09
Supplement: fig6-figsupp2-data1 [file Numerical source data for Figure 6-figure supplement 2.xlsx]

## Sheet: Fig 6 supp2 a
Type	mouse	Bin	% of FT+ cells
WT	1	1	44.4444
WT	1	2	11.1111
WT	1	3	2.61438
WT	1	4	14.3791
WT	1	5	27.451
WT	2	1	47.9167
WT	2	2	4.16667
WT	2	3	11.8056
WT	2	4	22.2222
WT	2	5	13.8889
WT	3	1	44.8276
WT	3	2	9.1954
WT	3	3	5.74713
WT	3	4	24.7126
WT	3	5	15.5172
WT	4	1	41.3408
WT	4	2	10.0559
WT	4	3	16.7598
WT	4	4	17.3184
WT	4	5	14.5251
DKO	1	1	41.4286
DKO	1	2	7.14286
DKO	1	3	7.14286
DKO	1	4	20.7143
DKO	1	5	23.5714
DKO	2	1	43.7037
DKO	2	2	12.5926
DKO	2	3	6.66667
DKO	2	4	16.2963
DKO	2	5	20.7407
DKO	3	1	44.2478
DKO	3	2	6.19469
DKO	3	3	14.1593
DKO	3	4	15.9292
DKO	3	5	19.469
DKO	4	1	44.6927
DKO	4	2	9.49721
DKO	4	3	20.1117
DKO	4	4	11.7318
DKO	4	5	13.9665

## Sheet: Fig 6 supp 2 b
Type	mouse	Bin	% of FT+ cells
WT	1	1	45.0777
WT	1	2	15.0259
WT	1	3	22.7979
WT	1	4	6.21762
WT	1	5	10.8808
WT	2	1	59.8837
WT	2	2	8.72093
WT	2	3	8.13953
WT	2	4	8.13953
WT	2	5	15.1163
WT	3	1	57.5269
WT	3	2	3.76344
WT	3	3	9.67742
WT	3	4	13.9785
WT	3	5	15.0538
WT	4	1	52.8302
WT	4	2	19.3396
WT	4	3	9.43396
WT	4	4	13.2075
WT	4	5	5.18868
DKO	1	1	46.3415
DKO	1	2	13.6585
DKO	1	3	18.5366
DKO	1	4	13.1707
DKO	1	5	8.29268
DKO	2	1	58.0838
DKO	2	2	20.3593
DKO	2	3	2.39521
DKO	2	4	10.7784
DKO	2	5	8.38323
DKO	3	1	49.6599
DKO	3	2	19.0476
DKO	3	3	3.40136
DKO	3	4	10.8844
DKO	3	5	17.0068
DKO	4	1	53.2374
DKO	4	2	25.1799
DKO	4	3	6.47482
DKO	4	4	10.7914
DKO	4	5	4.31655
