# Supplementary material for: Assembly of neuron- and radial glial-cell-derived extracellular matrix molecules promotes radial migration of developing cortical neurons
Source: eLife journal article supplement (doi:10.7554/elife.92342), 2023-11-09
Supplement: fig6-figsupp3-data1 [file Numerical source data for Figure 6-figure supplement 3.xlsx]

## Sheet: Fig6 supp 3 b
Type	Bin	% of NeuN+ cells
WT	Bin1	9.40767
WT	Bin2	27.5261
WT	Bin3	20.3252
WT	Bin4	21.9512
WT	Bin5	20.7898
WT	Bin1	14.491
WT	Bin2	26.7066
WT	Bin3	18.9222
WT	Bin4	20.1198
WT	Bin5	19.7605
WT	Bin1	17.6394
WT	Bin2	33.7224
WT	Bin3	18.9364
WT	Bin4	17.8988
WT	Bin5	11.8029
DKO	Bin1	17.2654
DKO	Bin2	34.1831
DKO	Bin3	18.3082
DKO	Bin4	18.8876
DKO	Bin5	11.3557
DKO	Bin1	17.2414
DKO	Bin2	30.4828
DKO	Bin3	19.5862
DKO	Bin4	17.1034
DKO	Bin5	15.5862
DKO	Bin1	18.4143
DKO	Bin2	28.5166
DKO	Bin3	18.798
DKO	Bin4	19.6931
DKO	Bin5	14.578

## Sheet: Fig6 supp3 c
Type	Bin	% of Ctip2+ cells
WT	Bin1	1.36612
WT	Bin2	1.36612
WT	Bin3	12.0219
WT	Bin4	36.3388
WT	Bin5	48.9071
WT	Bin1	2.59366
WT	Bin2	3.45821
WT	Bin3	12.6801
WT	Bin4	31.7003
WT	Bin5	49.5677
WT	Bin1	4.23453
WT	Bin2	6.84039
WT	Bin3	9.44625
WT	Bin4	37.4593
WT	Bin5	42.0195
DKO	Bin1	2.53807
DKO	Bin2	0.761421
DKO	Bin3	13.9594
DKO	Bin4	40.3553
DKO	Bin5	42.3858
DKO	Bin1	3.03867
DKO	Bin2	2.20994
DKO	Bin3	9.39227
DKO	Bin4	33.4254
DKO	Bin5	51.9337
DKO	Bin1	3.19767
DKO	Bin2	2.03488
DKO	Bin3	13.0814
DKO	Bin4	42.7326
DKO	Bin5	38.9535
