# Supplementary material for: Assembly of neuron- and radial glial-cell-derived extracellular matrix molecules promotes radial migration of developing cortical neurons
Source: eLife journal article supplement (doi:10.7554/elife.92342), 2023-11-09
Supplement: fig6-figsupp4-data1 [file Numerical source data for Figure 6-figure supplement 4.xlsx]

## Sheet: Fig6 supp4 a
Type	Pax6+cell	Tbr2+cell
WT	108	92
WT	112	89
WT	116	83
WT	120	78
WT	124	98
DKO	105	93
DKO	103	90
DKO	113	87
DKO	139	95
DKO	116	92
