# Supplementary material for: Assembly of neuron- and radial glial-cell-derived extracellular matrix molecules promotes radial migration of developing cortical neurons
Source: eLife journal article supplement (doi:10.7554/elife.92342), 2023-11-09
Supplement: fig7-data1 [file Numerical source data for Figure 7.xlsx]

## Sheet: Fig 7 a
Type	Bin	% of FT+ cells
WT	1	28.4483
WT	2	24.1379
WT	3	13.7931
WT	4	22.4138
WT	5	11.2069
WT	1	4.58716
WT	2	25.6881
WT	3	28.4404
WT	4	12.844
WT	5	28.4404
WT	1	1.23457
WT	2	20.3704
WT	3	44.4444
WT	4	16.0494
WT	5	17.9012
WT	1	0.666667
WT	2	16.6667
WT	3	36
WT	4	30
WT	5	16.6667
WT	1	4.02685
WT	2	21.4765
WT	3	33.557
WT	4	20.8054
WT	5	20.1342
WT	1	12.5
WT	2	28.9062
WT	3	27.3438
WT	4	18.75
WT	5	12.5
WT	1	17.3333
WT	2	26
WT	3	13.3333
WT	4	26
WT	5	17.3333
WT	1	12.3188
WT	2	32.6087
WT	3	25.3623
WT	4	20.2899
WT	5	9.42029
WT	1	1.25786
WT	2	33.3333
WT	3	30.1887
WT	4	18.8679
WT	5	16.3522
WT	1	3.62319
WT	2	21.0145
WT	3	36.2319
WT	4	21.0145
WT	5	18.1159
WT	1	1.93548
WT	2	33.5484
WT	3	32.2581
WT	4	19.3548
WT	5	12.9032
WT	1	2.5974
WT	2	28.5714
WT	3	33.1169
WT	4	22.0779
WT	5	13.6364
WT	1	0
WT	2	16
WT	3	47.3333
WT	4	17.3333
WT	5	19.3333
WT	1	32.0652
WT	2	14.1304
WT	3	21.7391
WT	4	20.1087
WT	5	11.9565
WT	1	6.81818
WT	2	26.3636
WT	3	26.8182
WT	4	23.1818
WT	5	16.8182
WT	1	26.257
WT	2	18.9944
WT	3	27.933
WT	4	21.2291
WT	5	5.58659
WT	1	10
WT	2	27.2727
WT	3	22.2727
WT	4	26.3636
WT	5	14.0909
WT	1	22.2973
WT	2	28.3784
WT	3	14.8649
WT	4	23.6486
WT	5	10.8108
WT	1	4.39024
WT	2	20
WT	3	29.2683
WT	4	27.3171
WT	5	19.0244
WT	1	19.2708
WT	2	28.125
WT	3	8.33333
WT	4	24.4792
WT	5	19.7917
NCAN KO	1	0
NCAN KO	2	7.18954
NCAN KO	3	31.3725
NCAN KO	4	33.3333
NCAN KO	5	28.1046
NCAN KO	1	0
NCAN KO	2	19.0476
NCAN KO	3	27.7778
NCAN KO	4	21.4286
NCAN KO	5	31.746
NCAN KO	1	0
NCAN KO	2	15
NCAN KO	3	38
NCAN KO	4	25
NCAN KO	5	22
NCAN KO	1	8.9172
NCAN KO	2	33.758
NCAN KO	3	13.3758
NCAN KO	4	17.1975
NCAN KO	5	26.7516
NCAN KO	1	3.63636
NCAN KO	2	16.3636
NCAN KO	3	15.4545
NCAN KO	4	21.8182
NCAN KO	5	42.7273
NCAN KO	1	1.84049
NCAN KO	2	14.1104
NCAN KO	3	33.1288
NCAN KO	4	22.0859
NCAN KO	5	28.8344
NCAN KO	1	2.27273
NCAN KO	2	16.6667
NCAN KO	3	27.2727
NCAN KO	4	31.0606
NCAN KO	5	22.7273
NCAN KO	1	2.54237
NCAN KO	2	25.4237
NCAN KO	3	28.8136
NCAN KO	4	23.7288
NCAN KO	5	19.4915
NCAN KO	1	0
NCAN KO	2	14.1892
NCAN KO	3	34.4595
NCAN KO	4	20.9459
NCAN KO	5	30.4054
NCAN KO	1	0
NCAN KO	2	11.0169
NCAN KO	3	38.1356
NCAN KO	4	16.9492
NCAN KO	5	33.8983
NCAN KO	1	0
NCAN KO	2	2.94118
NCAN KO	3	27.451
NCAN KO	4	42.1569
NCAN KO	5	27.451
NCAN KO	1	0
NCAN KO	2	19.7183
NCAN KO	3	29.5775
NCAN KO	4	23.2394
NCAN KO	5	27.4648
NCAN KO	1	1.86916
NCAN KO	2	20.5607
NCAN KO	3	25.2336
NCAN KO	4	22.4299
NCAN KO	5	29.9065
NCAN KO	1	21.4286
NCAN KO	2	17.3469
NCAN KO	3	12.7551
NCAN KO	4	29.0816
NCAN KO	5	19.3878
NCAN KO	1	12.5
NCAN KO	2	21.875
NCAN KO	3	16.9643
NCAN KO	4	34.8214
NCAN KO	5	13.8393
NCAN KO	1	12.9555
NCAN KO	2	23.8866
NCAN KO	3	17.8138
NCAN KO	4	27.1255
NCAN KO	5	18.2186
NCAN KO	1	12.1076
NCAN KO	2	24.6637
NCAN KO	3	18.3857
NCAN KO	4	26.9058
NCAN KO	5	17.9372
NCAN KO	1	18.0556
NCAN KO	2	19.9074
NCAN KO	3	21.7593
NCAN KO	4	22.6852
NCAN KO	5	17.5926
NCAN KO	1	16.2437
NCAN KO	2	21.3198
NCAN KO	3	17.7665
NCAN KO	4	25.3807
NCAN KO	5	19.2893
NCAN KO	1	20.3463
NCAN KO	2	27.2727
NCAN KO	3	12.1212
NCAN KO	4	24.2424
NCAN KO	5	16.0173
TNC KO	1	5.33333
TNC KO	2	24.6667
TNC KO	3	20.6667
TNC KO	4	28.6667
TNC KO	5	20.6667
TNC KO	1	26.0504
TNC KO	2	30.2521
TNC KO	3	11.7647
TNC KO	4	22.6891
TNC KO	5	9.2437
TNC KO	1	17.7778
TNC KO	2	26.6667
TNC KO	3	21.4815
TNC KO	4	19.2593
TNC KO	5	14.8148
TNC KO	1	39.6552
TNC KO	2	16.3793
TNC KO	3	9.48276
TNC KO	4	21.5517
TNC KO	5	12.931
TNC KO	1	18
TNC KO	2	20.6667
TNC KO	3	18.6667
TNC KO	4	26
TNC KO	5	16.6667
TNC KO	1	19.863
TNC KO	2	30.8219
TNC KO	3	14.3836
TNC KO	4	21.2329
TNC KO	5	13.6986
TNC KO	1	0.854701
TNC KO	2	11.9658
TNC KO	3	39.3162
TNC KO	4	28.2051
TNC KO	5	19.6581
TNC KO	1	0
TNC KO	2	3.05344
TNC KO	3	29.0076
TNC KO	4	48.855
TNC KO	5	19.084
TNC KO	1	0.735294
TNC KO	2	15.4412
TNC KO	3	42.6471
TNC KO	4	17.6471
TNC KO	5	23.5294
TNC KO	1	2.83688
TNC KO	2	21.2766
TNC KO	3	34.7518
TNC KO	4	21.9858
TNC KO	5	19.1489
TNC KO	1	14.4828
TNC KO	2	31.7241
TNC KO	3	22.069
TNC KO	4	21.3793
TNC KO	5	10.3448
TNC KO	1	1.53846
TNC KO	2	23.8462
TNC KO	3	31.5385
TNC KO	4	26.1538
TNC KO	5	16.9231
TNC KO	1	27.8409
TNC KO	2	14.2045
TNC KO	3	7.95455
TNC KO	4	28.9773
TNC KO	5	21.0227
TNC KO	1	17.9167
TNC KO	2	28.3333
TNC KO	3	10.8333
TNC KO	4	26.25
TNC KO	5	16.6667
TNC KO	1	8.75576
TNC KO	2	23.5023
TNC KO	3	22.5806
TNC KO	4	28.5714
TNC KO	5	16.5899
TNC KO	1	6.84932
TNC KO	2	20.0913
TNC KO	3	25.1142
TNC KO	4	26.484
TNC KO	5	21.4612
TNC KO	1	0
TNC KO	2	14.4231
TNC KO	3	36.0577
TNC KO	4	26.9231
TNC KO	5	22.5962
TNC KO	1	1.04712
TNC KO	2	14.1361
TNC KO	3	34.0314
TNC KO	4	23.0366
TNC KO	5	27.7487
TNC KO	1	1.46341
TNC KO	2	23.4146
TNC KO	3	25.8537
TNC KO	4	24.3902
TNC KO	5	24.878
TNC KO	1	7.55556
TNC KO	2	27.1111
TNC KO	3	15.5556
TNC KO	4	26.6667
TNC KO	5	23.1111
TNC KO	1	11.8721
TNC KO	2	31.5068
TNC KO	3	23.2877
TNC KO	4	20.0913
TNC KO	5	13.242

## Sheet: Fig 7 b
Type	X	Intensity
WT	1	0.0863836
WT	2	-0.0329927
WT	3	-0.0296596
WT	4	-0.0659599
WT	5	-0.0547172
WT	6	-0.078976
WT	7	-0.0524046
WT	8	-0.0467947
WT	9	-0.0522776
WT	10	-0.055305
WT	11	-0.0830139
WT	12	-0.0756458
WT	13	-0.0897737
WT	14	-0.0925617
WT	15	-0.0956297
WT	16	-0.0910965
WT	17	-0.0779759
WT	18	-0.062271
WT	19	-0.0125164
WT	20	0.0129225
WT	21	0.0411399
WT	22	0.245678
WT	23	0.686063
WT	24	0.722873
WT	25	0.562531
WT	26	0.831339
WT	27	0.710551
WT	28	0.589829
WT	29	0.408236
WT	30	0.414742
WT	31	0.575626
WT	32	0.69546
WT	33	1.01383
WT	34	0.928098
WT	35	0.845902
WT	36	0.830467
WT	37	0.707124
WT	38	0.694673
WT	39	0.57242
WT	40	0.487658
WT	41	0.541767
WT	42	0.468308
WT	43	0.43854
WT	44	0.548602
WT	45	0.498891
WT	46	0.589817
WT	47	0.45079
WT	48	0.555812
WT	49	0.458348
WT	50	0.355129
WT	51	0.418723
WT	52	0.440942
WT	53	0.351315
WT	54	0.213061
WT	55	0.267957
WT	56	0.196486
WT	57	0.234824
WT	58	0.142752
WT	59	0.212667
WT	60	0.166073
WT	61	0.175194
WT	62	0.109523
WT	63	0.0582223
WT	64	0.0230461
WT	65	0.0414427
WT	66	-0.0409252
WT	67	0.0143903
WT	68	-0.0494682
WT	69	-0.0289343
WT	70	-0.0229249
WT	71	-0.0516462
WT	72	-0.0447638
WT	73	0.00137192
WT	74	-0.000628465
WT	75	-0.0245274
WT	76	-0.0282751
WT	77	-0.0213883
WT	78	-0.0566128
WT	79	-0.0378844
WT	80	-0.0484404
WT	81	-0.081029
WT	82	-0.0653496
WT	83	-0.117315
WT	84	-0.0599813
WT	85	-0.0797624
WT	86	-0.05546
WT	87	-0.0982282
WT	88	-0.0741425
WT	89	-0.0646676
WT	90	-0.104357
WT	91	-0.11358
WT	92	-0.0133397
WT	93	0.00991559
WT	94	0.102817
WT	95	0.237348
WT	96	0.154323
WT	97	0.224889
WT	98	0.256496
WT	99	0.32702
WT	100	0.486223
WT	1	0.0407382
WT	2	0.0336615
WT	3	0.0410576
WT	4	0.0168374
WT	5	0.0266461
WT	6	0.0690628
WT	7	0.0297496
WT	8	0.0568187
WT	9	0.0322996
WT	10	0.0199388
WT	11	0.0170082
WT	12	-0.0155199
WT	13	-0.0375831
WT	14	-0.0448608
WT	15	-0.0424155
WT	16	0.00597904
WT	17	-0.0363228
WT	18	-0.0383707
WT	19	-0.0428054
WT	20	0.0183623
WT	21	0.00942991
WT	22	0.0815387
WT	23	0.158541
WT	24	0.335432
WT	25	0.598134
WT	26	0.666316
WT	27	0.460952
WT	28	0.510601
WT	29	0.438191
WT	30	0.402582
WT	31	0.435047
WT	32	0.276055
WT	33	0.36855
WT	34	0.424881
WT	35	0.530422
WT	36	0.540403
WT	37	0.508745
WT	38	0.591473
WT	39	0.938462
WT	40	0.812213
WT	41	0.84592
WT	42	0.607177
WT	43	0.629881
WT	44	0.527174
WT	45	0.57905
WT	46	0.642617
WT	47	0.587427
WT	48	0.338174
WT	49	0.322
WT	50	0.252847
WT	51	0.241154
WT	52	0.271894
WT	53	0.1603
WT	54	0.199951
WT	55	0.17248
WT	56	0.170714
WT	57	0.150052
WT	58	0.161943
WT	59	0.0991299
WT	60	0.111257
WT	61	0.0564482
WT	62	0.0553943
WT	63	0.0731168
WT	64	0.0523354
WT	65	0.0614959
WT	66	0.0448352
WT	67	0.0324962
WT	68	0.0394771
WT	69	0.0340839
WT	70	0.0229279
WT	71	0.0189354
WT	72	-0.00314561
WT	73	-0.0438649
WT	74	-0.0285489
WT	75	-0.0370495
WT	76	-0.0506184
WT	77	-0.0402721
WT	78	-0.0191208
WT	79	-0.0316584
WT	80	-0.0623479
WT	81	-0.061081
WT	82	-0.0559353
WT	83	-0.0399642
WT	84	-0.053692
WT	85	-0.0691754
WT	86	-0.0388186
WT	87	-0.0494394
WT	88	-0.0734547
WT	89	-0.0822286
WT	90	-0.0785367
WT	91	-0.0784299
WT	92	-0.0901294
WT	93	-0.0734292
WT	94	-0.044847
WT	95	-0.0450229
WT	96	-0.00427453
WT	97	0.0759722
WT	98	0.304528
WT	99	0.46104
WT	100	0.523726
WT	1	0.0982709
WT	2	0.143385
WT	3	0.14022
WT	4	0.130592
WT	5	0.0877985
WT	6	0.0807178
WT	7	0.0603526
WT	8	0.0473639
WT	9	0.0476253
WT	10	0.037121
WT	11	0.0539133
WT	12	0.0481194
WT	13	0.0797252
WT	14	0.0770833
WT	15	0.0922152
WT	16	0.061625
WT	17	0.0717949
WT	18	0.0952321
WT	19	0.0922779
WT	20	0.0616323
WT	21	0.0698799
WT	22	0.105517
WT	23	0.0445455
WT	24	0.116498
WT	25	0.163621
WT	26	0.166345
WT	27	0.272662
WT	28	0.572263
WT	29	0.954937
WT	30	1.04561
WT	31	0.883721
WT	32	0.912623
WT	33	0.918063
WT	34	0.625935
WT	35	0.482537
WT	36	0.682185
WT	37	0.675762
WT	38	0.611632
WT	39	0.569308
WT	40	0.485746
WT	41	0.484486
WT	42	0.769049
WT	43	0.886479
WT	44	0.813246
WT	45	1.16669
WT	46	1.26146
WT	47	0.99557
WT	48	0.914598
WT	49	0.847622
WT	50	0.906077
WT	51	0.948585
WT	52	1.05299
WT	53	0.689808
WT	54	0.723891
WT	55	0.58469
WT	56	0.570034
WT	57	0.584676
WT	58	0.424501
WT	59	0.445387
WT	60	0.441459
WT	61	0.430106
WT	62	0.455337
WT	63	0.324307
WT	64	0.361023
WT	65	0.259995
WT	66	0.273449
WT	67	0.258481
WT	68	0.18232
WT	69	0.156354
WT	70	0.163891
WT	71	0.130257
WT	72	0.0622231
WT	73	0.0250388
WT	74	0.0716023
WT	75	0.05563
WT	76	0.115467
WT	77	0.0562389
WT	78	0.0480978
WT	79	0.0437729
WT	80	0.0350912
WT	81	0.0456158
WT	82	0.0458464
WT	83	0.0722235
WT	84	0.0712433
WT	85	0.055686
WT	86	0.0823594
WT	87	0.0762815
WT	88	0.0219217
WT	89	0.0383421
WT	90	0.00811183
WT	91	0.0429925
WT	92	0.0167891
WT	93	0.0223266
WT	94	0.0609243
WT	95	0.12639
WT	96	0.120672
WT	97	0.13095
WT	98	0.190785
WT	99	0.322515
WT	100	0.53792
WT	1	0.375559
WT	2	0.439752
WT	3	0.447656
WT	4	0.454504
WT	5	0.41854
WT	6	0.409535
WT	7	0.299605
WT	8	0.377216
WT	9	0.331703
WT	10	0.32592
WT	11	0.308702
WT	12	0.269932
WT	13	0.255041
WT	14	0.236233
WT	15	0.245939
WT	16	0.171398
WT	17	0.210782
WT	18	0.205119
WT	19	0.189536
WT	20	0.233782
WT	21	0.218295
WT	22	0.192514
WT	23	0.125415
WT	24	0.151387
WT	25	0.253856
WT	26	0.411314
WT	27	0.736236
WT	28	1.02412
WT	29	0.98441
WT	30	1.09702
WT	31	1.34724
WT	32	1.28478
WT	33	1.05453
WT	34	0.788112
WT	35	0.698649
WT	36	0.863239
WT	37	1.02957
WT	38	0.996185
WT	39	1.01586
WT	40	0.857639
WT	41	1.21946
WT	42	1.27155
WT	43	1.53291
WT	44	1.31787
WT	45	1.37502
WT	46	1.0479
WT	47	1.13428
WT	48	1.111
WT	49	0.812505
WT	50	0.774192
WT	51	0.96921
WT	52	0.766892
WT	53	0.700294
WT	54	0.684459
WT	55	0.694227
WT	56	0.687032
WT	57	0.683901
WT	58	0.488708
WT	59	0.629662
WT	60	0.612624
WT	61	0.481517
WT	62	0.517432
WT	63	0.576221
WT	64	0.488153
WT	65	0.511844
WT	66	0.564022
WT	67	0.476885
WT	68	0.505472
WT	69	0.458559
WT	70	0.362723
WT	71	0.351939
WT	72	0.474846
WT	73	0.369233
WT	74	0.480147
WT	75	0.462698
WT	76	0.560787
WT	77	0.470696
WT	78	0.535569
WT	79	0.352792
WT	80	0.4458
WT	81	0.457032
WT	82	0.378277
WT	83	0.425482
WT	84	0.409027
WT	85	0.508591
WT	86	0.438526
WT	87	0.290024
WT	88	0.226971
WT	89	0.218561
WT	90	0.245402
WT	91	0.333174
WT	92	0.432787
WT	93	0.60588
WT	94	0.577674
WT	95	0.770712
WT	96	0.991211
WT	97	1.12662
WT	98	1.38429
WT	99	1.62755
WT	100	1.86334
WT	1	0.316237
WT	2	0.353366
WT	3	0.316509
WT	4	0.248611
WT	5	0.189718
WT	6	0.266542
WT	7	0.306215
WT	8	0.251823
WT	9	0.120863
WT	10	0.195254
WT	11	0.197547
WT	12	0.250408
WT	13	0.206562
WT	14	0.264208
WT	15	0.250609
WT	16	0.0687782
WT	17	0.0216692
WT	18	0.0775969
WT	19	0.0805038
WT	20	0.0318391
WT	21	0.0153735
WT	22	0.0178767
WT	23	0.0631815
WT	24	0.0208017
WT	25	0.0820246
WT	26	0.2421
WT	27	0.461428
WT	28	0.40261
WT	29	0.609763
WT	30	0.576229
WT	31	0.570985
WT	32	0.660319
WT	33	0.461823
WT	34	0.530547
WT	35	0.637943
WT	36	0.989857
WT	37	0.922653
WT	38	0.62294
WT	39	0.751093
WT	40	0.857923
WT	41	1.01335
WT	42	0.897024
WT	43	0.787305
WT	44	0.705474
WT	45	0.872218
WT	46	0.61808
WT	47	0.405788
WT	48	0.46441
WT	49	0.350749
WT	50	0.270839
WT	51	0.372626
WT	52	0.358877
WT	53	0.33519
WT	54	0.3377
WT	55	0.258674
WT	56	0.343085
WT	57	0.212144
WT	58	0.217255
WT	59	0.12397
WT	60	0.378209
WT	61	0.44716
WT	62	0.358376
WT	63	0.25949
WT	64	0.262616
WT	65	0.335183
WT	66	0.321576
WT	67	0.281252
WT	68	0.263853
WT	69	0.367278
WT	70	0.461581
WT	71	0.36386
WT	72	0.340722
WT	73	0.349242
WT	74	0.416476
WT	75	0.442585
WT	76	0.454941
WT	77	0.381828
WT	78	0.563504
WT	79	0.408411
WT	80	0.450402
WT	81	0.612307
WT	82	0.661101
WT	83	0.64057
WT	84	0.632999
WT	85	0.68439
WT	86	0.680327
WT	87	0.728428
WT	88	0.662209
WT	89	0.546641
WT	90	0.647543
WT	91	0.802005
WT	92	0.823262
WT	93	1.17581
WT	94	1.24088
WT	95	1.24699
WT	96	1.39594
WT	97	1.27761
WT	98	1.49953
WT	99	1.7282
WT	100	1.76394
WT	1	0.411592
WT	2	0.363618
WT	3	0.351957
WT	4	0.36239
WT	5	0.343079
WT	6	0.290797
WT	7	0.294361
WT	8	0.277021
WT	9	0.232955
WT	10	0.226825
WT	11	0.176101
WT	12	0.18445
WT	13	0.183416
WT	14	0.174799
WT	15	0.164326
WT	16	0.181731
WT	17	0.170846
WT	18	0.231967
WT	19	0.319287
WT	20	0.359728
WT	21	0.407244
WT	22	0.50225
WT	23	0.565738
WT	24	0.593209
WT	25	0.636499
WT	26	0.958163
WT	27	0.940076
WT	28	0.915072
WT	29	0.75161
WT	30	0.624173
WT	31	0.585562
WT	32	0.494702
WT	33	0.516443
WT	34	0.46175
WT	35	0.521888
WT	36	0.440305
WT	37	0.421164
WT	38	0.641109
WT	39	0.447666
WT	40	0.566769
WT	41	0.745721
WT	42	0.849051
WT	43	0.631828
WT	44	0.553717
WT	45	0.493615
WT	46	0.383986
WT	47	0.448709
WT	48	0.576427
WT	49	0.719921
WT	50	0.725682
WT	51	0.570288
WT	52	0.612934
WT	53	0.532889
WT	54	0.422228
WT	55	0.426276
WT	56	0.408736
WT	57	0.387031
WT	58	0.40726
WT	59	0.37306
WT	60	0.384664
WT	61	0.421176
WT	62	0.388513
WT	63	0.409456
WT	64	0.318873
WT	65	0.239234
WT	66	0.307319
WT	67	0.160228
WT	68	0.204901
WT	69	0.101438
WT	70	0.137155
WT	71	0.155667
WT	72	0.0725317
WT	73	0.157714
WT	74	0.0661544
WT	75	0.0751101
WT	76	0.0869324
WT	77	0.155814
WT	78	0.106465
WT	79	0.0976376
WT	80	0.0807641
WT	81	0.145801
WT	82	0.203411
WT	83	0.188811
WT	84	0.143748
WT	85	0.138947
WT	86	0.112529
WT	87	0.109595
WT	88	0.171956
WT	89	0.302448
WT	90	0.224065
WT	91	0.257347
WT	92	0.279752
WT	93	0.263516
WT	94	0.43468
WT	95	0.363289
WT	96	0.459091
WT	97	0.566799
WT	98	0.557298
WT	99	0.819558
WT	100	1.01543
WT	1	0.151361
WT	2	0.151929
WT	3	0.141468
WT	4	0.163108
WT	5	0.170006
WT	6	0.181789
WT	7	0.189538
WT	8	0.171415
WT	9	0.193093
WT	10	0.138018
WT	11	0.143168
WT	12	0.135325
WT	13	0.142918
WT	14	0.150643
WT	15	0.142799
WT	16	0.155737
WT	17	0.143343
WT	18	0.074853
WT	19	0.0854953
WT	20	0.130335
WT	21	0.104381
WT	22	0.103217
WT	23	0.340547
WT	24	0.405597
WT	25	0.595643
WT	26	0.605861
WT	27	0.579549
WT	28	0.561126
WT	29	0.341857
WT	30	0.474668
WT	31	0.691882
WT	32	0.501759
WT	33	0.530712
WT	34	0.374203
WT	35	0.405107
WT	36	0.428601
WT	37	0.344036
WT	38	0.399616
WT	39	0.580456
WT	40	0.646068
WT	41	0.696691
WT	42	0.650457
WT	43	0.539459
WT	44	0.529133
WT	45	0.532569
WT	46	0.555998
WT	47	0.493979
WT	48	0.445964
WT	49	0.35136
WT	50	0.315792
WT	51	0.326223
WT	52	0.292422
WT	53	0.264488
WT	54	0.281962
WT	55	0.254485
WT	56	0.301266
WT	57	0.328088
WT	58	0.303364
WT	59	0.210442
WT	60	0.190849
WT	61	0.19988
WT	62	0.218572
WT	63	0.150815
WT	64	0.16516
WT	65	0.209277
WT	66	0.120091
WT	67	0.170185
WT	68	0.151636
WT	69	0.172168
WT	70	0.200315
WT	71	0.154202
WT	72	0.154625
WT	73	0.119286
WT	74	0.0845556
WT	75	0.0899513
WT	76	0.167841
WT	77	0.2055
WT	78	0.183309
WT	79	0.236783
WT	80	0.211246
WT	81	0.212457
WT	82	0.159948
WT	83	0.148348
WT	84	0.144807
WT	85	0.0980079
WT	86	0.0603795
WT	87	0.0936839
WT	88	0.0546004
WT	89	0.0750075
WT	90	0.118151
WT	91	0.113222
WT	92	0.18118
WT	93	0.234344
WT	94	0.358041
WT	95	0.477676
WT	96	0.515194
WT	97	0.498749
WT	98	0.673898
WT	99	0.984112
WT	100	0.996941
WT	1	0.359968
WT	2	0.338308
WT	3	0.29981
WT	4	0.319512
WT	5	0.256591
WT	6	0.249996
WT	7	0.273447
WT	8	0.298675
WT	9	0.273942
WT	10	0.238697
WT	11	0.209697
WT	12	0.188264
WT	13	0.175343
WT	14	0.150224
WT	15	0.122011
WT	16	0.141716
WT	17	0.146632
WT	18	0.143144
WT	19	0.161658
WT	20	0.150952
WT	21	0.268907
WT	22	0.246981
WT	23	0.216016
WT	24	0.326333
WT	25	0.58383
WT	26	0.615428
WT	27	0.61
WT	28	0.662216
WT	29	0.720911
WT	30	0.674912
WT	31	0.573599
WT	32	0.632167
WT	33	0.51189
WT	34	0.400377
WT	35	0.440418
WT	36	0.490021
WT	37	0.442411
WT	38	0.394884
WT	39	0.559351
WT	40	0.64165
WT	41	0.655156
WT	42	0.698525
WT	43	0.706546
WT	44	0.493967
WT	45	0.45716
WT	46	0.425574
WT	47	0.394247
WT	48	0.41206
WT	49	0.428472
WT	50	0.380888
WT	51	0.426455
WT	52	0.345101
WT	53	0.303834
WT	54	0.342634
WT	55	0.335228
WT	56	0.365922
WT	57	0.384355
WT	58	0.319192
WT	59	0.256833
WT	60	0.342617
WT	61	0.456379
WT	62	0.380561
WT	63	0.351425
WT	64	0.326777
WT	65	0.32883
WT	66	0.352831
WT	67	0.286696
WT	68	0.313132
WT	69	0.341759
WT	70	0.294629
WT	71	0.254542
WT	72	0.416591
WT	73	0.38935
WT	74	0.324687
WT	75	0.30778
WT	76	0.384177
WT	77	0.362978
WT	78	0.391059
WT	79	0.31318
WT	80	0.388526
WT	81	0.46361
WT	82	0.445845
WT	83	0.42437
WT	84	0.393731
WT	85	0.313557
WT	86	0.361024
WT	87	0.375873
WT	88	0.309718
WT	89	0.254094
WT	90	0.249187
WT	91	0.377847
WT	92	0.405771
WT	93	0.478447
WT	94	0.594764
WT	95	0.666023
WT	96	0.811109
WT	97	0.902012
WT	98	0.852573
WT	99	0.784116
WT	100	0.812478
NCAN KO	1	0.220138
NCAN KO	2	0.207567
NCAN KO	3	0.214936
NCAN KO	4	0.219404
NCAN KO	5	0.212281
NCAN KO	6	0.21652
NCAN KO	7	0.203711
NCAN KO	8	0.169308
NCAN KO	9	0.180955
NCAN KO	10	0.152013
NCAN KO	11	0.162418
NCAN KO	12	0.174043
NCAN KO	13	0.182148
NCAN KO	14	0.124006
NCAN KO	15	0.169658
NCAN KO	16	0.188922
NCAN KO	17	0.169858
NCAN KO	18	0.155362
NCAN KO	19	0.133538
NCAN KO	20	0.144861
NCAN KO	21	0.176213
NCAN KO	22	0.18525
NCAN KO	23	0.166186
NCAN KO	24	0.202045
NCAN KO	25	0.256013
NCAN KO	26	0.259202
NCAN KO	27	0.402211
NCAN KO	28	0.499183
NCAN KO	29	0.453885
NCAN KO	30	0.488338
NCAN KO	31	0.325839
NCAN KO	32	0.272075
NCAN KO	33	0.111009
NCAN KO	34	0.0417229
NCAN KO	35	0.0994303
NCAN KO	36	0.142985
NCAN KO	37	0.0222152
NCAN KO	38	-0.0191033
NCAN KO	39	0.0825315
NCAN KO	40	0.0789357
NCAN KO	41	0.0673162
NCAN KO	42	0.033991
NCAN KO	43	0.107316
NCAN KO	44	0.368975
NCAN KO	45	0.430439
NCAN KO	46	0.55937
NCAN KO	47	0.568971
NCAN KO	48	0.679965
NCAN KO	49	0.969712
NCAN KO	50	0.923567
NCAN KO	51	1.19707
NCAN KO	52	1.22954
NCAN KO	53	0.920403
NCAN KO	54	0.956151
NCAN KO	55	0.847637
NCAN KO	56	0.632781
NCAN KO	57	0.804355
NCAN KO	58	0.743668
NCAN KO	59	0.678583
NCAN KO	60	0.68292
NCAN KO	61	0.569697
NCAN KO	62	0.557928
NCAN KO	63	0.475111
NCAN KO	64	0.540989
NCAN KO	65	0.57752
NCAN KO	66	0.484927
NCAN KO	67	0.550596
NCAN KO	68	0.506681
NCAN KO	69	0.403911
NCAN KO	70	0.300147
NCAN KO	71	0.31834
NCAN KO	72	0.276105
NCAN KO	73	0.232102
NCAN KO	74	0.181403
NCAN KO	75	0.18681
NCAN KO	76	0.174847
NCAN KO	77	0.163864
NCAN KO	78	0.137361
NCAN KO	79	0.0949964
NCAN KO	80	0.0669133
NCAN KO	81	0.0801089
NCAN KO	82	0.0857815
NCAN KO	83	0.0865218
NCAN KO	84	0.119993
NCAN KO	85	0.108475
NCAN KO	86	0.103916
NCAN KO	87	0.102167
NCAN KO	88	0.10585
NCAN KO	89	0.134289
NCAN KO	90	0.111046
NCAN KO	91	0.0906719
NCAN KO	92	0.0885321
NCAN KO	93	0.154328
NCAN KO	94	0.146236
NCAN KO	95	0.185756
NCAN KO	96	0.27619
NCAN KO	97	0.304081
NCAN KO	98	0.578848
NCAN KO	99	0.882187
NCAN KO	100	1.16363
NCAN KO	1	0.27152
NCAN KO	2	0.241561
NCAN KO	3	0.234836
NCAN KO	4	0.221178
NCAN KO	5	0.233386
NCAN KO	6	0.225969
NCAN KO	7	0.239675
NCAN KO	8	0.229072
NCAN KO	9	0.185467
NCAN KO	10	0.192852
NCAN KO	11	0.185136
NCAN KO	12	0.224008
NCAN KO	13	0.172766
NCAN KO	14	0.203607
NCAN KO	15	0.205824
NCAN KO	16	0.180579
NCAN KO	17	0.200583
NCAN KO	18	0.222298
NCAN KO	19	0.163695
NCAN KO	20	0.160177
NCAN KO	21	0.156276
NCAN KO	22	0.139803
NCAN KO	23	0.169444
NCAN KO	24	0.145479
NCAN KO	25	0.155479
NCAN KO	26	0.214846
NCAN KO	27	0.237247
NCAN KO	28	0.339442
NCAN KO	29	0.432224
NCAN KO	30	0.408595
NCAN KO	31	0.3351
NCAN KO	32	0.520811
NCAN KO	33	0.424614
NCAN KO	34	0.369107
NCAN KO	35	0.372355
NCAN KO	36	0.748492
NCAN KO	37	0.86572
NCAN KO	38	0.933781
NCAN KO	39	0.806912
NCAN KO	40	0.885653
NCAN KO	41	0.815108
NCAN KO	42	0.758693
NCAN KO	43	0.691812
NCAN KO	44	0.988277
NCAN KO	45	0.838415
NCAN KO	46	1.17787
NCAN KO	47	1.34878
NCAN KO	48	1.52441
NCAN KO	49	1.39145
NCAN KO	50	1.45174
NCAN KO	51	1.605
NCAN KO	52	1.35446
NCAN KO	53	1.15717
NCAN KO	54	1.17046
NCAN KO	55	1.20432
NCAN KO	56	1.02208
NCAN KO	57	0.902573
NCAN KO	58	0.847587
NCAN KO	59	0.802955
NCAN KO	60	0.80676
NCAN KO	61	0.682094
NCAN KO	62	0.643554
NCAN KO	63	0.675808
NCAN KO	64	0.655175
NCAN KO	65	0.633487
NCAN KO	66	0.554813
NCAN KO	67	0.554749
NCAN KO	68	0.432259
NCAN KO	69	0.538485
NCAN KO	70	0.551841
NCAN KO	71	0.539723
NCAN KO	72	0.471573
NCAN KO	73	0.554002
NCAN KO	74	0.639682
NCAN KO	75	0.636735
NCAN KO	76	0.566151
NCAN KO	77	0.535089
NCAN KO	78	0.470515
NCAN KO	79	0.387807
NCAN KO	80	0.410308
NCAN KO	81	0.350608
NCAN KO	82	0.354881
NCAN KO	83	0.269786
NCAN KO	84	0.206842
NCAN KO	85	0.19017
NCAN KO	86	0.170716
NCAN KO	87	0.162346
NCAN KO	88	0.158495
NCAN KO	89	0.166459
NCAN KO	90	0.121207
NCAN KO	91	0.116696
NCAN KO	92	0.14387
NCAN KO	93	0.180953
NCAN KO	94	0.24431
NCAN KO	95	0.293415
NCAN KO	96	0.266272
NCAN KO	97	0.356712
NCAN KO	98	0.419547
NCAN KO	99	0.648405
NCAN KO	100	0.913779
NCAN KO	1	0.191614
NCAN KO	2	0.193371
NCAN KO	3	0.162857
NCAN KO	4	0.175044
NCAN KO	5	0.165774
NCAN KO	6	0.162211
NCAN KO	7	0.128105
NCAN KO	8	0.107891
NCAN KO	9	0.119078
NCAN KO	10	0.115855
NCAN KO	11	0.144586
NCAN KO	12	0.125154
NCAN KO	13	0.121187
NCAN KO	14	0.129811
NCAN KO	15	0.141746
NCAN KO	16	0.164575
NCAN KO	17	0.17089
NCAN KO	18	0.162681
NCAN KO	19	0.102526
NCAN KO	20	0.120299
NCAN KO	21	0.15975
NCAN KO	22	0.133791
NCAN KO	23	0.157994
NCAN KO	24	0.2017
NCAN KO	25	0.168882
NCAN KO	26	0.221524
NCAN KO	27	0.247295
NCAN KO	28	0.158077
NCAN KO	29	0.191074
NCAN KO	30	0.182818
NCAN KO	31	0.0526787
NCAN KO	32	-0.0912621
NCAN KO	33	-0.121519
NCAN KO	34	-0.11278
NCAN KO	35	0.0529859
NCAN KO	36	0.169225
NCAN KO	37	0.206166
NCAN KO	38	0.262774
NCAN KO	39	0.257871
NCAN KO	40	0.275359
NCAN KO	41	0.17787
NCAN KO	42	0.0274722
NCAN KO	43	-0.0563863
NCAN KO	44	0.186741
NCAN KO	45	0.485186
NCAN KO	46	0.537571
NCAN KO	47	0.625397
NCAN KO	48	0.763899
NCAN KO	49	0.77252
NCAN KO	50	1.05988
NCAN KO	51	1.06436
NCAN KO	52	0.786236
NCAN KO	53	0.787942
NCAN KO	54	0.86534
NCAN KO	55	0.763604
NCAN KO	56	0.655425
NCAN KO	57	0.561098
NCAN KO	58	0.648094
NCAN KO	59	0.654848
NCAN KO	60	0.784553
NCAN KO	61	0.706653
NCAN KO	62	0.770614
NCAN KO	63	0.677164
NCAN KO	64	0.583925
NCAN KO	65	0.489957
NCAN KO	66	0.453316
NCAN KO	67	0.485157
NCAN KO	68	0.377765
NCAN KO	69	0.461635
NCAN KO	70	0.357866
NCAN KO	71	0.381143
NCAN KO	72	0.450779
NCAN KO	73	0.376161
NCAN KO	74	0.342171
NCAN KO	75	0.340957
NCAN KO	76	0.260051
NCAN KO	77	0.188916
NCAN KO	78	0.243823
NCAN KO	79	0.222354
NCAN KO	80	0.143379
NCAN KO	81	0.172939
NCAN KO	82	0.189954
NCAN KO	83	0.154577
NCAN KO	84	0.155774
NCAN KO	85	0.175712
NCAN KO	86	0.126088
NCAN KO	87	0.0849282
NCAN KO	88	0.106668
NCAN KO	89	0.105019
NCAN KO	90	0.121238
NCAN KO	91	0.10512
NCAN KO	92	0.0901522
NCAN KO	93	0.105488
NCAN KO	94	0.122041
NCAN KO	95	0.166753
NCAN KO	96	0.200815
NCAN KO	97	0.308351
NCAN KO	98	0.381619
NCAN KO	99	0.524067
NCAN KO	100	0.862459
NCAN KO	1	0.129977
NCAN KO	2	0.152437
NCAN KO	3	0.194156
NCAN KO	4	0.216071
NCAN KO	5	0.150884
NCAN KO	6	0.182411
NCAN KO	7	0.171499
NCAN KO	8	0.161197
NCAN KO	9	0.164375
NCAN KO	10	0.140051
NCAN KO	11	0.138868
NCAN KO	12	0.138257
NCAN KO	13	0.12232
NCAN KO	14	0.165394
NCAN KO	15	0.116971
NCAN KO	16	0.112185
NCAN KO	17	0.124585
NCAN KO	18	0.14186
NCAN KO	19	0.120532
NCAN KO	20	0.150606
NCAN KO	21	0.277423
NCAN KO	22	0.25927
NCAN KO	23	0.146835
NCAN KO	24	0.149709
NCAN KO	25	0.152028
NCAN KO	26	0.146555
NCAN KO	27	0.228312
NCAN KO	28	0.207083
NCAN KO	29	0.257122
NCAN KO	30	0.352252
NCAN KO	31	0.342947
NCAN KO	32	0.373635
NCAN KO	33	0.317075
NCAN KO	34	0.193756
NCAN KO	35	0.162394
NCAN KO	36	0.13139
NCAN KO	37	0.254061
NCAN KO	38	0.293407
NCAN KO	39	0.315422
NCAN KO	40	0.318177
NCAN KO	41	0.201437
NCAN KO	42	0.245902
NCAN KO	43	0.213282
NCAN KO	44	0.186107
NCAN KO	45	0.104729
NCAN KO	46	0.292312
NCAN KO	47	0.313125
NCAN KO	48	0.307338
NCAN KO	49	0.325835
NCAN KO	50	0.442081
NCAN KO	51	0.664047
NCAN KO	52	0.686555
NCAN KO	53	0.745895
NCAN KO	54	0.869305
NCAN KO	55	0.836854
NCAN KO	56	0.675685
NCAN KO	57	0.803918
NCAN KO	58	0.749736
NCAN KO	59	0.796765
NCAN KO	60	0.701312
NCAN KO	61	0.618391
NCAN KO	62	0.555623
NCAN KO	63	0.57771
NCAN KO	64	0.535769
NCAN KO	65	0.463953
NCAN KO	66	0.480038
NCAN KO	67	0.328793
NCAN KO	68	0.258366
NCAN KO	69	0.277764
NCAN KO	70	0.313543
NCAN KO	71	0.272038
NCAN KO	72	0.292767
NCAN KO	73	0.27694
NCAN KO	74	0.206202
NCAN KO	75	0.201858
NCAN KO	76	0.209883
NCAN KO	77	0.197694
NCAN KO	78	0.204668
NCAN KO	79	0.136207
NCAN KO	80	0.139352
NCAN KO	81	0.113181
NCAN KO	82	0.099588
NCAN KO	83	0.15843
NCAN KO	84	0.0902772
NCAN KO	85	0.201584
NCAN KO	86	0.0906026
NCAN KO	87	0.0726689
NCAN KO	88	0.0889103
NCAN KO	89	0.0338382
NCAN KO	90	0.0140468
NCAN KO	91	0.0181152
NCAN KO	92	0.0193915
NCAN KO	93	0.0415901
NCAN KO	94	0.0919832
NCAN KO	95	0.119283
NCAN KO	96	0.14715
NCAN KO	97	0.137701
NCAN KO	98	0.190342
NCAN KO	99	0.378721
NCAN KO	100	0.696008
NCAN KO	1	0.0645591
NCAN KO	2	0.0517328
NCAN KO	3	0.0196461
NCAN KO	4	0.00434558
NCAN KO	5	-0.00592132
NCAN KO	6	-0.0250119
NCAN KO	7	-0.0244583
NCAN KO	8	-0.0226756
NCAN KO	9	-0.0569008
NCAN KO	10	-0.0261052
NCAN KO	11	-0.0302883
NCAN KO	12	-0.0098993
NCAN KO	13	-0.0079185
NCAN KO	14	0.00214533
NCAN KO	15	0.0227221
NCAN KO	16	-0.00948363
NCAN KO	17	0.0034979
NCAN KO	18	0.024265
NCAN KO	19	0.0548626
NCAN KO	20	0.0121712
NCAN KO	21	0.016374
NCAN KO	22	0.0297682
NCAN KO	23	0.0643607
NCAN KO	24	0.0383876
NCAN KO	25	0.108967
NCAN KO	26	0.145281
NCAN KO	27	0.176109
NCAN KO	28	0.284682
NCAN KO	29	0.387484
NCAN KO	30	0.426486
NCAN KO	31	0.447697
NCAN KO	32	0.398743
NCAN KO	33	0.282895
NCAN KO	34	0.317448
NCAN KO	35	0.315702
NCAN KO	36	0.28484
NCAN KO	37	0.214642
NCAN KO	38	0.0270942
NCAN KO	39	-0.132465
NCAN KO	40	-0.153851
NCAN KO	41	0.111828
NCAN KO	42	0.308391
NCAN KO	43	0.268265
NCAN KO	44	0.275912
NCAN KO	45	0.345584
NCAN KO	46	0.292753
NCAN KO	47	0.37446
NCAN KO	48	0.312257
NCAN KO	49	0.339505
NCAN KO	50	0.376797
NCAN KO	51	0.353451
NCAN KO	52	0.544869
NCAN KO	53	0.861334
NCAN KO	54	0.656234
NCAN KO	55	0.465909
NCAN KO	56	0.569206
NCAN KO	57	0.741488
NCAN KO	58	0.634341
NCAN KO	59	0.940553
NCAN KO	60	0.670018
NCAN KO	61	0.566205
NCAN KO	62	0.654221
NCAN KO	63	0.54874
NCAN KO	64	0.480236
NCAN KO	65	0.550815
NCAN KO	66	0.387158
NCAN KO	67	0.35054
NCAN KO	68	0.376616
NCAN KO	69	0.278349
NCAN KO	70	0.228295
NCAN KO	71	0.223928
NCAN KO	72	0.158446
NCAN KO	73	0.162749
NCAN KO	74	0.0830882
NCAN KO	75	0.0947695
NCAN KO	76	0.143633
NCAN KO	77	0.129435
NCAN KO	78	0.082061
NCAN KO	79	0.0529984
NCAN KO	80	0.0697967
NCAN KO	81	0.0524193
NCAN KO	82	0.0769269
NCAN KO	83	0.0285665
NCAN KO	84	0.0888337
NCAN KO	85	0.0471946
NCAN KO	86	0.0275785
NCAN KO	87	0.0678763
NCAN KO	88	0.054206
NCAN KO	89	0.0271284
NCAN KO	90	-0.00368606
NCAN KO	91	0.0253526
NCAN KO	92	0.0647225
NCAN KO	93	0.13858
NCAN KO	94	0.129534
NCAN KO	95	0.156584
NCAN KO	96	0.171668
NCAN KO	97	0.237827
NCAN KO	98	0.303419
NCAN KO	99	0.538344
NCAN KO	100	0.933293
NCAN KO	1	0.571982
NCAN KO	2	0.52402
NCAN KO	3	0.47854
NCAN KO	4	0.458673
NCAN KO	5	0.446399
NCAN KO	6	0.413332
NCAN KO	7	0.413995
NCAN KO	8	0.37122
NCAN KO	9	0.343529
NCAN KO	10	0.368477
NCAN KO	11	0.377041
NCAN KO	12	0.383214
NCAN KO	13	0.374992
NCAN KO	14	0.366921
NCAN KO	15	0.400867
NCAN KO	16	0.391978
NCAN KO	17	0.350047
NCAN KO	18	0.393871
NCAN KO	19	0.470637
NCAN KO	20	0.426645
NCAN KO	21	0.349339
NCAN KO	22	0.305291
NCAN KO	23	0.316497
NCAN KO	24	0.313767
NCAN KO	25	0.318879
NCAN KO	26	0.351038
NCAN KO	27	0.440226
NCAN KO	28	0.458909
NCAN KO	29	0.621565
NCAN KO	30	0.545799
NCAN KO	31	0.663179
NCAN KO	32	0.752499
NCAN KO	33	0.810034
NCAN KO	34	0.631075
NCAN KO	35	0.598291
NCAN KO	36	0.54781
NCAN KO	37	0.712504
NCAN KO	38	0.632338
NCAN KO	39	0.621176
NCAN KO	40	0.525799
NCAN KO	41	0.392548
NCAN KO	42	0.463022
NCAN KO	43	0.598371
NCAN KO	44	0.716714
NCAN KO	45	0.711917
NCAN KO	46	0.641474
NCAN KO	47	0.842318
NCAN KO	48	0.83349
NCAN KO	49	0.920759
NCAN KO	50	0.79914
NCAN KO	51	0.823854
NCAN KO	52	0.84439
NCAN KO	53	0.822515
NCAN KO	54	0.740247
NCAN KO	55	0.880209
NCAN KO	56	0.954717
NCAN KO	57	1.08208
NCAN KO	58	0.825516
NCAN KO	59	0.932763
NCAN KO	60	0.840089
NCAN KO	61	0.886442
NCAN KO	62	0.706787
NCAN KO	63	0.683651
NCAN KO	64	0.594129
NCAN KO	65	0.580667
NCAN KO	66	0.569349
NCAN KO	67	0.52036
NCAN KO	68	0.687566
NCAN KO	69	0.684417
NCAN KO	70	0.620664
NCAN KO	71	0.509718
NCAN KO	72	0.467143
NCAN KO	73	0.443724
NCAN KO	74	0.410395
NCAN KO	75	0.316204
NCAN KO	76	0.307575
NCAN KO	77	0.340284
NCAN KO	78	0.259812
NCAN KO	79	0.256549
NCAN KO	80	0.168947
NCAN KO	81	0.20918
NCAN KO	82	0.160883
NCAN KO	83	0.185557
NCAN KO	84	0.168725
NCAN KO	85	0.138746
NCAN KO	86	0.171274
NCAN KO	87	0.133828
NCAN KO	88	0.0804941
NCAN KO	89	0.0913299
NCAN KO	90	0.100435
NCAN KO	91	0.0747698
NCAN KO	92	0.115601
NCAN KO	93	0.126312
NCAN KO	94	0.099409
NCAN KO	95	0.0883556
NCAN KO	96	0.0827735
NCAN KO	97	0.153644
NCAN KO	98	0.203222
NCAN KO	99	0.156477
NCAN KO	100	0.213261
NCAN KO	1	0.266967
NCAN KO	2	0.281335
NCAN KO	3	0.256621
NCAN KO	4	0.223394
NCAN KO	5	0.21592
NCAN KO	6	0.206484
NCAN KO	7	0.192565
NCAN KO	8	0.205113
NCAN KO	9	0.187536
NCAN KO	10	0.201931
NCAN KO	11	0.190392
NCAN KO	12	0.193067
NCAN KO	13	0.207917
NCAN KO	14	0.172025
NCAN KO	15	0.149167
NCAN KO	16	0.142028
NCAN KO	17	0.148357
NCAN KO	18	0.151946
NCAN KO	19	0.157878
NCAN KO	20	0.170376
NCAN KO	21	0.177049
NCAN KO	22	0.251872
NCAN KO	23	0.353102
NCAN KO	24	0.725414
NCAN KO	25	0.855411
NCAN KO	26	0.822879
NCAN KO	27	0.852178
NCAN KO	28	0.783399
NCAN KO	29	0.862608
NCAN KO	30	0.786376
NCAN KO	31	0.704106
NCAN KO	32	0.675276
NCAN KO	33	0.646407
NCAN KO	34	0.674595
NCAN KO	35	0.614707
NCAN KO	36	0.657598
NCAN KO	37	0.680109
NCAN KO	38	0.627019
NCAN KO	39	0.612632
NCAN KO	40	0.699855
NCAN KO	41	0.624786
NCAN KO	42	0.737626
NCAN KO	43	0.814516
NCAN KO	44	0.771059
NCAN KO	45	0.853641
NCAN KO	46	1.06454
NCAN KO	47	1.07464
NCAN KO	48	1.10052
NCAN KO	49	0.958456
NCAN KO	50	0.974298
NCAN KO	51	0.908643
NCAN KO	52	1.0517
NCAN KO	53	1.10943
NCAN KO	54	1.0476
NCAN KO	55	0.93061
NCAN KO	56	0.864105
NCAN KO	57	0.759759
NCAN KO	58	0.677082
NCAN KO	59	0.688238
NCAN KO	60	0.622721
NCAN KO	61	0.571087
NCAN KO	62	0.530603
NCAN KO	63	0.374143
NCAN KO	64	0.399625
NCAN KO	65	0.40021
NCAN KO	66	0.420168
NCAN KO	67	0.330924
NCAN KO	68	0.315236
NCAN KO	69	0.275644
NCAN KO	70	0.241869
NCAN KO	71	0.261053
NCAN KO	72	0.199714
NCAN KO	73	0.210196
NCAN KO	74	0.172091
NCAN KO	75	0.187487
NCAN KO	76	0.152627
NCAN KO	77	0.150321
NCAN KO	78	0.175945
NCAN KO	79	0.119619
NCAN KO	80	0.0985618
NCAN KO	81	0.186017
NCAN KO	82	0.156519
NCAN KO	83	0.192951
NCAN KO	84	0.138227
NCAN KO	85	0.145451
NCAN KO	86	0.275635
NCAN KO	87	0.180517
NCAN KO	88	0.119613
NCAN KO	89	0.100141
NCAN KO	90	0.11186
NCAN KO	91	0.100702
NCAN KO	92	0.0817682
NCAN KO	93	0.0905002
NCAN KO	94	0.116321
NCAN KO	95	0.172484
NCAN KO	96	0.183547
NCAN KO	97	0.143341
NCAN KO	98	0.170914
NCAN KO	99	0.215322
NCAN KO	100	0.326048
NCAN KO	1	0.240467
NCAN KO	2	0.234926
NCAN KO	3	0.238365
NCAN KO	4	0.285585
NCAN KO	5	0.364707
NCAN KO	6	0.348002
NCAN KO	7	0.327574
NCAN KO	8	0.344784
NCAN KO	9	0.386474
NCAN KO	10	0.380817
NCAN KO	11	0.400842
NCAN KO	12	0.4047
NCAN KO	13	0.393244
NCAN KO	14	0.439895
NCAN KO	15	0.415149
NCAN KO	16	0.409169
NCAN KO	17	0.460902
NCAN KO	18	0.464914
NCAN KO	19	0.447204
NCAN KO	20	0.431907
NCAN KO	21	0.415775
NCAN KO	22	0.41342
NCAN KO	23	0.369811
NCAN KO	24	0.423667
NCAN KO	25	0.536062
NCAN KO	26	0.675609
NCAN KO	27	0.826461
NCAN KO	28	0.816422
NCAN KO	29	0.600143
NCAN KO	30	0.461854
NCAN KO	31	0.587066
NCAN KO	32	0.482932
NCAN KO	33	0.682455
NCAN KO	34	0.697452
NCAN KO	35	0.582983
NCAN KO	36	0.502011
NCAN KO	37	0.500912
NCAN KO	38	0.564345
NCAN KO	39	0.498927
NCAN KO	40	0.500759
NCAN KO	41	0.504328
NCAN KO	42	0.475319
NCAN KO	43	0.51504
NCAN KO	44	0.431872
NCAN KO	45	0.632746
NCAN KO	46	0.999132
NCAN KO	47	1.11118
NCAN KO	48	1.11448
NCAN KO	49	1.24263
NCAN KO	50	1.34449
NCAN KO	51	1.47669
NCAN KO	52	1.27083
NCAN KO	53	1.25519
NCAN KO	54	1.32825
NCAN KO	55	0.969164
NCAN KO	56	1.07638
NCAN KO	57	1.00111
NCAN KO	58	0.867338
NCAN KO	59	0.823333
NCAN KO	60	0.799592
NCAN KO	61	0.677202
NCAN KO	62	0.590289
NCAN KO	63	0.541646
NCAN KO	64	0.521856
NCAN KO	65	0.582661
NCAN KO	66	0.520424
NCAN KO	67	0.38301
NCAN KO	68	0.42088
NCAN KO	69	0.397065
NCAN KO	70	0.479778
NCAN KO	71	0.454527
NCAN KO	72	0.411177
NCAN KO	73	0.281688
NCAN KO	74	0.359102
NCAN KO	75	0.314113
NCAN KO	76	0.360995
NCAN KO	77	0.321043
NCAN KO	78	0.239786
NCAN KO	79	0.212042
NCAN KO	80	0.299231
NCAN KO	81	0.216015
NCAN KO	82	0.213354
NCAN KO	83	0.22566
NCAN KO	84	0.188755
NCAN KO	85	0.231773
NCAN KO	86	0.248324
NCAN KO	87	0.294465
NCAN KO	88	0.372782
NCAN KO	89	0.280917
NCAN KO	90	0.303659
NCAN KO	91	0.31686
NCAN KO	92	0.278221
NCAN KO	93	0.199558
NCAN KO	94	0.168932
NCAN KO	95	0.212767
NCAN KO	96	0.274674
NCAN KO	97	0.298009
NCAN KO	98	0.376399
NCAN KO	99	0.594671
NCAN KO	100	0.722906
NCAN KO	1	0.263305
NCAN KO	2	0.308104
NCAN KO	3	0.350816
NCAN KO	4	0.316754
NCAN KO	5	0.240919
NCAN KO	6	0.232323
NCAN KO	7	0.284951
NCAN KO	8	0.275039
NCAN KO	9	0.261414
NCAN KO	10	0.185447
NCAN KO	11	0.207781
NCAN KO	12	0.268626
NCAN KO	13	0.289608
NCAN KO	14	0.250999
NCAN KO	15	0.253635
NCAN KO	16	0.220461
NCAN KO	17	0.191416
NCAN KO	18	0.228541
NCAN KO	19	0.237233
NCAN KO	20	0.203451
NCAN KO	21	0.19463
NCAN KO	22	0.161992
NCAN KO	23	0.221142
NCAN KO	24	0.216162
NCAN KO	25	0.193892
NCAN KO	26	0.243713
NCAN KO	27	0.387438
NCAN KO	28	0.682065
NCAN KO	29	0.886656
NCAN KO	30	0.847103
NCAN KO	31	0.75953
NCAN KO	32	0.7672
NCAN KO	33	0.82976
NCAN KO	34	0.931706
NCAN KO	35	0.723039
NCAN KO	36	0.626086
NCAN KO	37	0.655483
NCAN KO	38	0.642235
NCAN KO	39	0.649878
NCAN KO	40	0.60733
NCAN KO	41	0.577281
NCAN KO	42	0.531887
NCAN KO	43	0.645044
NCAN KO	44	0.720544
NCAN KO	45	0.801751
NCAN KO	46	0.899754
NCAN KO	47	1.04894
NCAN KO	48	1.09975
NCAN KO	49	1.29241
NCAN KO	50	1.47543
NCAN KO	51	1.47165
NCAN KO	52	1.27301
NCAN KO	53	1.09447
NCAN KO	54	1.01028
NCAN KO	55	1.10329
NCAN KO	56	1.00539
NCAN KO	57	0.86435
NCAN KO	58	0.699242
NCAN KO	59	0.677301
NCAN KO	60	0.659891
NCAN KO	61	0.581403
NCAN KO	62	0.54268
NCAN KO	63	0.447236
NCAN KO	64	0.413424
NCAN KO	65	0.418155
NCAN KO	66	0.350067
NCAN KO	67	0.489504
NCAN KO	68	0.355258
NCAN KO	69	0.342356
NCAN KO	70	0.301783
NCAN KO	71	0.256794
NCAN KO	72	0.221661
NCAN KO	73	0.292548
NCAN KO	74	0.389085
NCAN KO	75	0.320451
NCAN KO	76	0.311805
NCAN KO	77	0.28371
NCAN KO	78	0.286969
NCAN KO	79	0.312343
NCAN KO	80	0.278598
NCAN KO	81	0.198834
NCAN KO	82	0.151519
NCAN KO	83	0.123537
NCAN KO	84	0.153916
NCAN KO	85	0.179879
NCAN KO	86	0.197257
NCAN KO	87	0.155369
NCAN KO	88	0.145316
NCAN KO	89	0.178711
NCAN KO	90	0.146638
NCAN KO	91	0.133376
NCAN KO	92	0.15999
NCAN KO	93	0.230274
NCAN KO	94	0.308753
NCAN KO	95	0.249031
NCAN KO	96	0.189817
NCAN KO	97	0.179659
NCAN KO	98	0.262362
NCAN KO	99	0.452576
NCAN KO	100	0.827714
NCAN KO	1	0.0314835
NCAN KO	2	0.0180638
NCAN KO	3	0.0297355
NCAN KO	4	0.00639867
NCAN KO	5	0.0348192
NCAN KO	6	0.0298352
NCAN KO	7	0.0274805
NCAN KO	8	0.0358039
NCAN KO	9	0.0277697
NCAN KO	10	0.0822891
NCAN KO	11	0.0722073
NCAN KO	12	0.091349
NCAN KO	13	0.106501
NCAN KO	14	0.100517
NCAN KO	15	0.105092
NCAN KO	16	0.120442
NCAN KO	17	0.141473
NCAN KO	18	0.14019
NCAN KO	19	0.145693
NCAN KO	20	0.164278
NCAN KO	21	0.157226
NCAN KO	22	0.180753
NCAN KO	23	0.223397
NCAN KO	24	0.251764
NCAN KO	25	0.297363
NCAN KO	26	0.36413
NCAN KO	27	0.440754
NCAN KO	28	0.623884
NCAN KO	29	0.760708
NCAN KO	30	0.575272
NCAN KO	31	0.331177
NCAN KO	32	0.490716
NCAN KO	33	0.402976
NCAN KO	34	0.34168
NCAN KO	35	0.614464
NCAN KO	36	0.775728
NCAN KO	37	0.589106
NCAN KO	38	0.690342
NCAN KO	39	0.706325
NCAN KO	40	0.63462
NCAN KO	41	0.687064
NCAN KO	42	0.70452
NCAN KO	43	0.593244
NCAN KO	44	0.623544
NCAN KO	45	0.611816
NCAN KO	46	0.66966
NCAN KO	47	0.868745
NCAN KO	48	1.10021
NCAN KO	49	1.14744
NCAN KO	50	1.34975
NCAN KO	51	1.63279
NCAN KO	52	1.44571
NCAN KO	53	1.5149
NCAN KO	54	1.6454
NCAN KO	55	1.58672
NCAN KO	56	1.37285
NCAN KO	57	1.54961
NCAN KO	58	1.26281
NCAN KO	59	1.44387
NCAN KO	60	1.49258
NCAN KO	61	1.29263
NCAN KO	62	0.947383
NCAN KO	63	1.05978
NCAN KO	64	0.85712
NCAN KO	65	0.842496
NCAN KO	66	1.00148
NCAN KO	67	0.904859
NCAN KO	68	0.755685
NCAN KO	69	0.728786
NCAN KO	70	0.608522
NCAN KO	71	0.667259
NCAN KO	72	0.792841
NCAN KO	73	0.7393
NCAN KO	74	0.638364
NCAN KO	75	0.537131
NCAN KO	76	0.488284
NCAN KO	77	0.433792
NCAN KO	78	0.404939
NCAN KO	79	0.395245
NCAN KO	80	0.436068
NCAN KO	81	0.389233
NCAN KO	82	0.363431
NCAN KO	83	0.327822
NCAN KO	84	0.339499
NCAN KO	85	0.321438
NCAN KO	86	0.269251
NCAN KO	87	0.28518
NCAN KO	88	0.27734
NCAN KO	89	0.287024
NCAN KO	90	0.283911
NCAN KO	91	0.311995
NCAN KO	92	0.248011
NCAN KO	93	0.263795
NCAN KO	94	0.266876
NCAN KO	95	0.29895
NCAN KO	96	0.320314
NCAN KO	97	0.426142
NCAN KO	98	0.610388
NCAN KO	99	1.07333
NCAN KO	100	1.64036
NCAN KO	1	0.512124
NCAN KO	2	0.493628
NCAN KO	3	0.473449
NCAN KO	4	0.513116
NCAN KO	5	0.493441
NCAN KO	6	0.447328
NCAN KO	7	0.435928
NCAN KO	8	0.385409
NCAN KO	9	0.387795
NCAN KO	10	0.364364
NCAN KO	11	0.391192
NCAN KO	12	0.353922
NCAN KO	13	0.380123
NCAN KO	14	0.373349
NCAN KO	15	0.397136
NCAN KO	16	0.377223
NCAN KO	17	0.399155
NCAN KO	18	0.37605
NCAN KO	19	0.380027
NCAN KO	20	0.367123
NCAN KO	21	0.37155
NCAN KO	22	0.355961
NCAN KO	23	0.321325
NCAN KO	24	0.365545
NCAN KO	25	0.334291
NCAN KO	26	0.559308
NCAN KO	27	0.394274
NCAN KO	28	0.448393
NCAN KO	29	0.676035
NCAN KO	30	0.660435
NCAN KO	31	0.589202
NCAN KO	32	0.653406
NCAN KO	33	0.696394
NCAN KO	34	0.699805
NCAN KO	35	0.669858
NCAN KO	36	0.525835
NCAN KO	37	0.505753
NCAN KO	38	0.496546
NCAN KO	39	0.417157
NCAN KO	40	0.460212
NCAN KO	41	0.515612
NCAN KO	42	0.584718
NCAN KO	43	0.728657
NCAN KO	44	0.841813
NCAN KO	45	0.896743
NCAN KO	46	0.951353
NCAN KO	47	0.987476
NCAN KO	48	1.1214
NCAN KO	49	1.2818
NCAN KO	50	1.45702
NCAN KO	51	1.55802
NCAN KO	52	1.26285
NCAN KO	53	1.25464
NCAN KO	54	1.07248
NCAN KO	55	1.25777
NCAN KO	56	1.09456
NCAN KO	57	1.02509
NCAN KO	58	1.00182
NCAN KO	59	0.988327
NCAN KO	60	1.05172
NCAN KO	61	0.929474
NCAN KO	62	0.93797
NCAN KO	63	0.955281
NCAN KO	64	0.779235
NCAN KO	65	0.679808
NCAN KO	66	0.795887
NCAN KO	67	0.733392
NCAN KO	68	0.570753
NCAN KO	69	0.575959
NCAN KO	70	0.646291
NCAN KO	71	0.496992
NCAN KO	72	0.52679
NCAN KO	73	0.600724
NCAN KO	74	0.419482
NCAN KO	75	0.494473
NCAN KO	76	0.473206
NCAN KO	77	0.371904
NCAN KO	78	0.323333
NCAN KO	79	0.296482
NCAN KO	80	0.319974
NCAN KO	81	0.348658
NCAN KO	82	0.237747
NCAN KO	83	0.214823
NCAN KO	84	0.257881
NCAN KO	85	0.214322
NCAN KO	86	0.181112
NCAN KO	87	0.207275
NCAN KO	88	0.27919
NCAN KO	89	0.337824
NCAN KO	90	0.307093
NCAN KO	91	0.198759
NCAN KO	92	0.201465
NCAN KO	93	0.233944
NCAN KO	94	0.206747
NCAN KO	95	0.335194
NCAN KO	96	0.334548
NCAN KO	97	0.385389
NCAN KO	98	0.464082
NCAN KO	99	0.609112
NCAN KO	100	1.13143
NCAN KO	1	0.0481229
NCAN KO	2	0.047947
NCAN KO	3	0.0375307
NCAN KO	4	0.0211125
NCAN KO	5	0.0267095
NCAN KO	6	0.0357254
NCAN KO	7	0.0259081
NCAN KO	8	0.0342479
NCAN KO	9	0.00896048
NCAN KO	10	0.0278151
NCAN KO	11	0.0179141
NCAN KO	12	0.0145975
NCAN KO	13	0.00542449
NCAN KO	14	0.00231357
NCAN KO	15	0.00381104
NCAN KO	16	0.00999795
NCAN KO	17	-0.0136817
NCAN KO	18	-0.033518
NCAN KO	19	-0.0486169
NCAN KO	20	-0.0642093
NCAN KO	21	-0.0747976
NCAN KO	22	-0.0784641
NCAN KO	23	-0.0727534
NCAN KO	24	-0.056419
NCAN KO	25	-0.0634854
NCAN KO	26	-0.0491567
NCAN KO	27	-0.0242303
NCAN KO	28	0.103515
NCAN KO	29	0.191896
NCAN KO	30	0.323252
NCAN KO	31	0.259428
NCAN KO	32	0.152829
NCAN KO	33	0.21073
NCAN KO	34	0.299006
NCAN KO	35	0.26294
NCAN KO	36	0.185191
NCAN KO	37	0.28541
NCAN KO	38	0.236751
NCAN KO	39	0.236321
NCAN KO	40	0.18788
NCAN KO	41	0.167694
NCAN KO	42	0.209991
NCAN KO	43	0.332414
NCAN KO	44	0.308613
NCAN KO	45	0.366153
NCAN KO	46	0.410097
NCAN KO	47	0.43635
NCAN KO	48	0.450359
NCAN KO	49	0.570443
NCAN KO	50	0.78049
NCAN KO	51	0.721502
NCAN KO	52	0.60908
NCAN KO	53	0.748248
NCAN KO	54	0.774538
NCAN KO	55	0.799269
NCAN KO	56	0.638491
NCAN KO	57	0.612423
NCAN KO	58	0.533128
NCAN KO	59	0.356636
NCAN KO	60	0.360092
NCAN KO	61	0.304386
NCAN KO	62	0.317815
NCAN KO	63	0.318175
NCAN KO	64	0.231957
NCAN KO	65	0.178216
NCAN KO	66	0.143405
NCAN KO	67	0.174161
NCAN KO	68	0.188725
NCAN KO	69	0.177303
NCAN KO	70	0.176832
NCAN KO	71	0.157557
NCAN KO	72	0.18296
NCAN KO	73	0.155217
NCAN KO	74	0.0972924
NCAN KO	75	0.0529546
NCAN KO	76	0.0796912
NCAN KO	77	0.0740915
NCAN KO	78	0.120637
NCAN KO	79	0.0918931
NCAN KO	80	0.140481
NCAN KO	81	0.19404
NCAN KO	82	0.131056
NCAN KO	83	0.151415
NCAN KO	84	0.116601
NCAN KO	85	0.139544
NCAN KO	86	0.159202
NCAN KO	87	0.203992
NCAN KO	88	0.149024
NCAN KO	89	0.0940202
NCAN KO	90	0.0864506
NCAN KO	91	0.0813687
NCAN KO	92	0.147222
NCAN KO	93	0.1129
NCAN KO	94	0.0974701
NCAN KO	95	0.0429178
NCAN KO	96	0.0766091
NCAN KO	97	0.103296
NCAN KO	98	0.172509
NCAN KO	99	0.268169
[truncated: 101 more rows]

## Sheet: Fig 7 c
Type	X	Intensity
WT	1	0.0943049
WT	2	0.0522199
WT	3	0.0244375
WT	4	0.0243584
WT	5	0.0192204
WT	6	0.0303371
WT	7	0.0280409
WT	8	0.0242993
WT	9	0.0316045
WT	10	0.032996
WT	11	0.0208339
WT	12	0.011184
WT	13	0.021893
WT	14	0.0171547
WT	15	0.00756002
WT	16	0.00798563
WT	17	0.0195477
WT	18	0.0179584
WT	19	0.0639081
WT	20	0.0957007
WT	21	0.181652
WT	22	0.417328
WT	23	1.43903
WT	24	1.6774
WT	25	1.51443
WT	26	1.7425
WT	27	1.50762
WT	28	1.514
WT	29	1.19632
WT	30	0.985834
WT	31	1.18813
WT	32	1.40537
WT	33	1.99721
WT	34	1.8232
WT	35	1.76803
WT	36	1.49572
WT	37	1.30111
WT	38	1.17097
WT	39	0.977325
WT	40	0.958034
WT	41	1.14531
WT	42	0.875403
WT	43	0.634194
WT	44	0.748308
WT	45	0.63645
WT	46	0.571936
WT	47	0.398044
WT	48	0.520327
WT	49	0.586649
WT	50	0.354826
WT	51	0.326837
WT	52	0.291514
WT	53	0.184149
WT	54	0.126928
WT	55	0.103051
WT	56	0.10338
WT	57	0.0942453
WT	58	0.0603087
WT	59	0.0656579
WT	60	0.06655
WT	61	0.0743133
WT	62	0.0531245
WT	63	0.0236875
WT	64	0.0337414
WT	65	0.0344068
WT	66	0.0135532
WT	67	0.0257738
WT	68	0.0216675
WT	69	0.015036
WT	70	0.01265
WT	71	0.00735722
WT	72	0.00559341
WT	73	0.0140661
WT	74	0.00270103
WT	75	0.0135978
WT	76	0.00601968
WT	77	0.00518952
WT	78	-0.00699548
WT	79	-0.00258343
WT	80	-0.00562935
WT	81	-0.0116047
WT	82	-0.0166294
WT	83	-0.0200661
WT	84	-0.00277596
WT	85	-0.0085083
WT	86	-0.0159023
WT	87	-0.0217914
WT	88	-0.0165699
WT	89	-0.0164016
WT	90	-0.018852
WT	91	-0.0185862
WT	92	-0.0132268
WT	93	0.0035059
WT	94	0.0257592
WT	95	0.0405776
WT	96	0.0307343
WT	97	0.0354408
WT	98	0.0505595
WT	99	0.0422772
WT	100	0.0484619
WT	1	-0.00345819
WT	2	-0.0110831
WT	3	-0.0132048
WT	4	-0.0219385
WT	5	-0.0177041
WT	6	-0.0146992
WT	7	-0.015565
WT	8	-0.0182082
WT	9	-0.0174659
WT	10	-0.0214686
WT	11	-0.0194882
WT	12	-0.01805
WT	13	-0.0214552
WT	14	-0.0174005
WT	15	-0.0117264
WT	16	-0.0135796
WT	17	-0.0235508
WT	18	-0.0216003
WT	19	-0.0229299
WT	20	-0.0114232
WT	21	0.00243636
WT	22	0.000354534
WT	23	0.0221276
WT	24	0.0964525
WT	25	0.153827
WT	26	0.356373
WT	27	0.964746
WT	28	1.27631
WT	29	1.25652
WT	30	1.09907
WT	31	1.19054
WT	32	0.843532
WT	33	0.945428
WT	34	1.00169
WT	35	0.699489
WT	36	0.624275
WT	37	0.539105
WT	38	0.741262
WT	39	1.47948
WT	40	1.27245
WT	41	1.05398
WT	42	0.547751
WT	43	0.449973
WT	44	0.394557
WT	45	0.514138
WT	46	0.451613
WT	47	0.313742
WT	48	0.197707
WT	49	0.14595
WT	50	0.0784975
WT	51	0.0806399
WT	52	0.109786
WT	53	0.0631872
WT	54	0.0552423
WT	55	0.032158
WT	56	0.0203568
WT	57	0.0343456
WT	58	0.0261915
WT	59	0.0147464
WT	60	0.00591078
WT	61	-0.001526
WT	62	0.000527033
WT	63	0.00858225
WT	64	0.00111635
WT	65	0.00531709
WT	66	-0.00549269
WT	67	-0.0062864
WT	68	-0.00654424
WT	69	-0.000806846
WT	70	0.00161692
WT	71	-0.00785818
WT	72	-0.00496409
WT	73	-0.0131081
WT	74	-0.0132836
WT	75	-0.0204314
WT	76	-0.0168721
WT	77	-0.0172738
WT	78	-0.0137417
WT	79	-0.013393
WT	80	-0.0145223
WT	81	-0.0171486
WT	82	-0.0213016
WT	83	-0.0198598
WT	84	-0.021874
WT	85	-0.0300369
WT	86	-0.0283463
WT	87	-0.0277726
WT	88	-0.0297827
WT	89	-0.0294368
WT	90	-0.0345867
WT	91	-0.0366572
WT	92	-0.0387704
WT	93	-0.0378668
WT	94	-0.0355868
WT	95	-0.0348505
WT	96	-0.0331188
WT	97	-0.0290829
WT	98	-0.0105448
WT	99	0.0050685
WT	100	0.0114076
WT	1	0.00955671
WT	2	0.00253471
WT	3	-0.00208434
WT	4	-0.00388083
WT	5	-0.00702129
WT	6	-0.00270156
WT	7	-0.00573615
WT	8	-0.00992754
WT	9	-0.0140841
WT	10	-0.0101994
WT	11	-0.010397
WT	12	-0.00747785
WT	13	-0.000114726
WT	14	0.0162324
WT	15	0.00771603
WT	16	-0.00341859
WT	17	-0.00730652
WT	18	0.00100197
WT	19	0.00663992
WT	20	-0.00409101
WT	21	-0.0104598
WT	22	0.00605207
WT	23	0.0104599
WT	24	0.00990391
WT	25	0.0184716
WT	26	0.0366221
WT	27	0.136623
WT	28	0.427966
WT	29	1.04128
WT	30	1.18667
WT	31	1.07429
WT	32	1.29277
WT	33	1.27964
WT	34	1.22088
WT	35	1.08323
WT	36	1.31918
WT	37	0.942916
WT	38	1.03379
WT	39	0.919764
WT	40	1.07935
WT	41	1.06326
WT	42	1.22865
WT	43	1.46109
WT	44	1.13074
WT	45	1.3432
WT	46	1.45322
WT	47	1.05789
WT	48	0.730608
WT	49	0.580351
WT	50	0.475979
WT	51	0.343787
WT	52	0.310547
WT	53	0.2595
WT	54	0.226483
WT	55	0.174994
WT	56	0.140979
WT	57	0.123135
WT	58	0.0990426
WT	59	0.0790911
WT	60	0.0719722
WT	61	0.0581414
WT	62	0.048095
WT	63	0.0363649
WT	64	0.0361622
WT	65	0.0177883
WT	66	0.00988179
WT	67	0.00979382
WT	68	0.00661875
WT	69	-0.000231769
WT	70	-0.00301054
WT	71	-0.00897934
WT	72	-0.0119507
WT	73	-0.0170581
WT	74	-0.0202485
WT	75	-0.0233109
WT	76	-0.0225671
WT	77	-0.0252085
WT	78	-0.0239101
WT	79	-0.024944
WT	80	-0.0233063
WT	81	-0.0252294
WT	82	-0.0284145
WT	83	-0.0249527
WT	84	-0.0258669
WT	85	-0.0264617
WT	86	-0.0275414
WT	87	-0.0307107
WT	88	-0.0316533
WT	89	-0.0326325
WT	90	-0.0342991
WT	91	-0.0360377
WT	92	-0.0351854
WT	93	-0.0363744
WT	94	-0.0336572
WT	95	-0.0314196
WT	96	-0.0298233
WT	97	-0.0304068
WT	98	-0.0271945
WT	99	-0.0192141
WT	100	0.00154295
WT	1	0.0222136
WT	2	0.0376091
WT	3	0.0545536
WT	4	0.0686645
WT	5	0.0287849
WT	6	0.012929
WT	7	0.00727658
WT	8	0.00823639
WT	9	0.0162075
WT	10	0.0173302
WT	11	0.0273572
WT	12	0.0437287
WT	13	0.0275448
WT	14	0.0108149
WT	15	0.0135786
WT	16	0.00582793
WT	17	0.00871897
WT	18	0.00960519
WT	19	0.0122199
WT	20	0.0358039
WT	21	0.0156301
WT	22	0.0216406
WT	23	0.0198098
WT	24	0.0310911
WT	25	0.0936688
WT	26	0.14738
WT	27	0.294991
WT	28	1.02247
WT	29	1.20408
WT	30	1.37139
WT	31	1.69618
WT	32	1.58914
WT	33	1.21012
WT	34	0.950071
WT	35	0.778951
WT	36	1.00071
WT	37	1.07029
WT	38	0.964327
WT	39	0.861388
WT	40	0.698992
WT	41	0.935229
WT	42	0.832684
WT	43	0.75732
WT	44	0.584743
WT	45	0.459753
WT	46	0.337057
WT	47	0.29129
WT	48	0.243229
WT	49	0.168068
WT	50	0.172011
WT	51	0.204225
WT	52	0.163537
WT	53	0.145897
WT	54	0.144128
WT	55	0.15478
WT	56	0.139344
WT	57	0.149358
WT	58	0.101587
WT	59	0.130848
WT	60	0.115212
WT	61	0.0999558
WT	62	0.0903222
WT	63	0.0997943
WT	64	0.0841459
WT	65	0.0714494
WT	66	0.0953022
WT	67	0.0855118
WT	68	0.0858966
WT	69	0.0842358
WT	70	0.0928941
WT	71	0.0578155
WT	72	0.0685897
WT	73	0.0747844
WT	74	0.0893021
WT	75	0.0579129
WT	76	0.068285
WT	77	0.0541566
WT	78	0.0494629
WT	79	0.0435843
WT	80	0.0428977
WT	81	0.0295579
WT	82	0.0310397
WT	83	0.0164364
WT	84	0.00604116
WT	85	0.022882
WT	86	0.0305329
WT	87	0.00674294
WT	88	-0.0165542
WT	89	-0.0200628
WT	90	-0.0165784
WT	91	-0.0020584
WT	92	0.00612698
WT	93	0.0274582
WT	94	0.0264164
WT	95	0.0419411
WT	96	0.063255
WT	97	0.0739139
WT	98	0.134241
WT	99	0.154711
WT	100	0.18806
WT	1	0.0989719
WT	2	0.113228
WT	3	0.0987204
WT	4	0.0842083
WT	5	0.0792696
WT	6	0.0942691
WT	7	0.116898
WT	8	0.0916343
WT	9	0.047186
WT	10	0.0995579
WT	11	0.1193
WT	12	0.101776
WT	13	0.114373
WT	14	0.147935
WT	15	0.132959
WT	16	0.0657327
WT	17	0.0920268
WT	18	0.118272
WT	19	0.114231
WT	20	0.0877381
WT	21	0.0905706
WT	22	0.105604
WT	23	0.108258
WT	24	0.0839446
WT	25	0.138534
WT	26	0.22979
WT	27	0.377334
WT	28	0.360432
WT	29	0.553499
WT	30	0.510805
WT	31	0.57324
WT	32	0.67388
WT	33	0.564803
WT	34	0.552081
WT	35	0.555762
WT	36	0.63458
WT	37	0.608242
WT	38	0.491437
WT	39	0.567727
WT	40	0.670498
WT	41	0.69755
WT	42	0.597082
WT	43	0.494386
WT	44	0.4324
WT	45	0.439585
WT	46	0.355711
WT	47	0.254765
WT	48	0.255152
WT	49	0.198351
WT	50	0.152606
WT	51	0.166302
WT	52	0.173917
WT	53	0.163357
WT	54	0.170505
WT	55	0.140021
WT	56	0.15088
WT	57	0.0984771
WT	58	0.107295
WT	59	0.0752773
WT	60	0.142486
WT	61	0.159931
WT	62	0.126969
WT	63	0.0893231
WT	64	0.0960336
WT	65	0.1029
WT	66	0.0849466
WT	67	0.0817515
WT	68	0.0966763
WT	69	0.120841
WT	70	0.164043
WT	71	0.12296
WT	72	0.104075
WT	73	0.0866789
WT	74	0.0891462
WT	75	0.0725597
WT	76	0.0739594
WT	77	0.0644479
WT	78	0.0888014
WT	79	0.0648665
WT	80	0.0628693
WT	81	0.0834258
WT	82	0.10185
WT	83	0.0805363
WT	84	0.0780448
WT	85	0.0746796
WT	86	0.0726248
WT	87	0.0687665
WT	88	0.0749191
WT	89	0.0629754
WT	90	0.0696983
WT	91	0.0897965
WT	92	0.0986651
WT	93	0.141616
WT	94	0.146991
WT	95	0.137679
WT	96	0.153327
WT	97	0.161281
WT	98	0.1949
WT	99	0.242245
WT	100	0.275221
WT	1	0.120645
WT	2	0.102421
WT	3	0.106041
WT	4	0.107667
WT	5	0.0840671
WT	6	0.0772741
WT	7	0.0866606
WT	8	0.0974419
WT	9	0.0965014
WT	10	0.0763074
WT	11	0.0741994
WT	12	0.102659
WT	13	0.115168
WT	14	0.0950374
WT	15	0.0906176
WT	16	0.0828888
WT	17	0.0811406
WT	18	0.103214
WT	19	0.137823
WT	20	0.156808
WT	21	0.159243
WT	22	0.239576
WT	23	0.296196
WT	24	0.343795
WT	25	0.455348
WT	26	0.765843
WT	27	0.994307
WT	28	1.11591
WT	29	0.880894
WT	30	0.898814
WT	31	0.924297
WT	32	0.848337
WT	33	1.02568
WT	34	0.982148
WT	35	0.943067
WT	36	0.905272
WT	37	0.634688
WT	38	1.0065
WT	39	0.81854
WT	40	0.875083
WT	41	1.0741
WT	42	1.17581
WT	43	0.918736
WT	44	0.710795
WT	45	0.603562
WT	46	0.462553
WT	47	0.457221
WT	48	0.459688
WT	49	0.487733
WT	50	0.547584
WT	51	0.44152
WT	52	0.38469
WT	53	0.296984
WT	54	0.212085
WT	55	0.192231
WT	56	0.171611
WT	57	0.153525
WT	58	0.15061
WT	59	0.120569
WT	60	0.108065
WT	61	0.105511
WT	62	0.0783078
WT	63	0.0622749
WT	64	0.0480614
WT	65	0.0332056
WT	66	0.0352453
WT	67	0.00859613
WT	68	0.00971185
WT	69	-0.000964497
WT	70	-0.000389903
WT	71	1.97969e-05
WT	72	-0.0125595
WT	73	-0.0130533
WT	74	-0.0116914
WT	75	-0.0158485
WT	76	-0.011259
WT	77	-0.00792131
WT	78	-0.0146369
WT	79	-0.0196637
WT	80	-0.0198957
WT	81	-0.0124085
WT	82	-0.00586026
WT	83	-0.00830286
WT	84	-0.0140098
WT	85	-0.0144442
WT	86	-0.0135547
WT	87	-0.0174413
WT	88	-0.0108579
WT	89	0.000629519
WT	90	0.000523291
WT	91	0.00227303
WT	92	0.0015277
WT	93	-0.000110211
WT	94	0.0110324
WT	95	0.015663
WT	96	0.021421
WT	97	0.0241397
WT	98	0.0357744
WT	99	0.0860532
WT	100	0.142286
WT	1	0.0546641
WT	2	0.0518392
WT	3	0.0421267
WT	4	0.0459854
WT	5	0.0475205
WT	6	0.0532682
WT	7	0.0469346
WT	8	0.039754
WT	9	0.0379454
WT	10	0.0215232
WT	11	0.021384
WT	12	0.0217257
WT	13	0.027542
WT	14	0.0277313
WT	15	0.0273114
WT	16	0.027156
WT	17	0.0316862
WT	18	0.0228156
WT	19	0.0234941
WT	20	0.0526227
WT	21	0.0642105
WT	22	0.0718702
WT	23	0.169492
WT	24	0.230178
WT	25	0.328267
WT	26	0.362543
WT	27	0.408754
WT	28	0.438294
WT	29	0.327684
WT	30	0.42747
WT	31	0.544313
WT	32	0.409373
WT	33	0.440207
WT	34	0.374125
WT	35	0.351564
WT	36	0.369325
WT	37	0.323783
WT	38	0.335112
WT	39	0.445235
WT	40	0.456509
WT	41	0.4602
WT	42	0.418809
WT	43	0.324794
WT	44	0.314392
WT	45	0.294293
WT	46	0.298502
WT	47	0.277459
WT	48	0.240519
WT	49	0.190618
WT	50	0.166183
WT	51	0.143684
WT	52	0.138165
WT	53	0.131524
WT	54	0.114263
WT	55	0.0832787
WT	56	0.0862231
WT	57	0.0820692
WT	58	0.0676636
WT	59	0.0429776
WT	60	0.0343642
WT	61	0.0312587
WT	62	0.036683
WT	63	0.0177817
WT	64	0.0230128
WT	65	0.0222302
WT	66	0.0104269
WT	67	0.0138509
WT	68	0.0111074
WT	69	0.0114042
WT	70	0.0158198
WT	71	0.0071123
WT	72	0.00978304
WT	73	-0.00013973
WT	74	-0.00619579
WT	75	-0.0068285
WT	76	-0.000698411
WT	77	-0.000965073
WT	78	0.00252245
WT	79	0.00461978
WT	80	-0.000905245
WT	81	0.00163609
WT	82	-0.00694748
WT	83	-0.00595535
WT	84	-0.00701443
WT	85	-0.010374
WT	86	-0.0167681
WT	87	-0.0143969
WT	88	-0.0219885
WT	89	-0.0173097
WT	90	-0.014494
WT	91	-0.0120309
WT	92	-0.0109525
WT	93	-0.0025119
WT	94	0.0122948
WT	95	0.0268249
WT	96	0.0333277
WT	97	0.0380031
WT	98	0.0676541
WT	99	0.123083
WT	100	0.141506
WT	1	0.0906782
WT	2	0.075723
WT	3	0.0701951
WT	4	0.0824833
WT	5	0.0646872
WT	6	0.0539601
WT	7	0.0533905
WT	8	0.0628089
WT	9	0.0654928
WT	10	0.0637349
WT	11	0.0674753
WT	12	0.0648626
WT	13	0.0503453
WT	14	0.0410627
WT	15	0.0373651
WT	16	0.0351567
WT	17	0.0377748
WT	18	0.0523116
WT	19	0.0553711
WT	20	0.0594479
WT	21	0.116245
WT	22	0.125878
WT	23	0.116978
WT	24	0.180439
WT	25	0.308099
WT	26	0.382915
WT	27	0.453668
WT	28	0.596741
WT	29	0.666686
WT	30	0.652325
WT	31	0.652329
WT	32	0.583761
WT	33	0.536924
WT	34	0.473673
WT	35	0.451941
WT	36	0.52644
WT	37	0.590406
WT	38	0.557973
WT	39	0.655375
WT	40	0.673198
WT	41	0.709682
WT	42	0.658358
WT	43	0.528352
WT	44	0.419815
WT	45	0.394487
WT	46	0.372647
WT	47	0.356506
WT	48	0.345415
WT	49	0.312113
WT	50	0.267708
WT	51	0.272954
WT	52	0.214424
WT	53	0.188389
WT	54	0.186877
WT	55	0.164
WT	56	0.160723
WT	57	0.158518
WT	58	0.115128
WT	59	0.106245
WT	60	0.100986
WT	61	0.119549
WT	62	0.0931613
WT	63	0.0668068
WT	64	0.0580203
WT	65	0.0465386
WT	66	0.0525449
WT	67	0.0445185
WT	68	0.0456345
WT	69	0.0440218
WT	70	0.0391008
WT	71	0.0339193
WT	72	0.0461476
WT	73	0.0362852
WT	74	0.0302539
WT	75	0.0326995
WT	76	0.0326248
WT	77	0.0299449
WT	78	0.0318551
WT	79	0.0237259
WT	80	0.0274115
WT	81	0.0296027
WT	82	0.0246421
WT	83	0.0206269
WT	84	0.0163494
WT	85	0.00839193
WT	86	0.00725896
WT	87	0.00665233
WT	88	0.00361315
WT	89	0.000706561
WT	90	0.000180847
WT	91	0.010503
WT	92	0.0182821
WT	93	0.0297849
WT	94	0.0423464
WT	95	0.0522924
WT	96	0.0850119
WT	97	0.102201
WT	98	0.116805
WT	99	0.129602
WT	100	0.173533
TNC KO	1	-0.0311091
TNC KO	2	-0.0293144
TNC KO	3	-0.0282926
TNC KO	4	-0.0263666
TNC KO	5	-0.0195322
TNC KO	6	-0.0149673
TNC KO	7	-0.0186863
TNC KO	8	-0.0160294
TNC KO	9	-0.0178096
TNC KO	10	-0.0218207
TNC KO	11	-0.0223632
TNC KO	12	-0.0168388
TNC KO	13	-0.0150687
TNC KO	14	-0.0170454
TNC KO	15	-0.0183838
TNC KO	16	-0.0179242
TNC KO	17	0.00237986
TNC KO	18	0.0372943
TNC KO	19	0.0508562
TNC KO	20	0.137599
TNC KO	21	0.241333
TNC KO	22	0.456953
TNC KO	23	0.557054
TNC KO	24	0.380747
TNC KO	25	0.414691
TNC KO	26	0.588641
TNC KO	27	0.799258
TNC KO	28	0.766299
TNC KO	29	0.50338
TNC KO	30	0.423469
TNC KO	31	0.578816
TNC KO	32	0.720053
TNC KO	33	0.778606
TNC KO	34	0.811208
TNC KO	35	0.875361
TNC KO	36	0.684156
TNC KO	37	0.548474
TNC KO	38	0.507778
TNC KO	39	0.503224
TNC KO	40	0.537426
TNC KO	41	0.552583
TNC KO	42	0.627161
TNC KO	43	0.598981
TNC KO	44	0.60335
TNC KO	45	0.411931
TNC KO	46	0.31381
TNC KO	47	0.339629
TNC KO	48	0.305575
TNC KO	49	0.318929
TNC KO	50	0.292329
TNC KO	51	0.240852
TNC KO	52	0.162537
TNC KO	53	0.135572
TNC KO	54	0.101127
TNC KO	55	0.077607
TNC KO	56	0.0685095
TNC KO	57	0.0570294
TNC KO	58	0.0434518
TNC KO	59	0.0349324
TNC KO	60	0.0262329
TNC KO	61	0.00947803
TNC KO	62	-0.00147777
TNC KO	63	-0.00735287
TNC KO	64	-0.0127889
TNC KO	65	-0.0175179
TNC KO	66	-0.0227496
TNC KO	67	-0.0252371
TNC KO	68	-0.0261105
TNC KO	69	-0.0265201
TNC KO	70	-0.0256991
TNC KO	71	-0.026123
TNC KO	72	-0.0292396
TNC KO	73	-0.0299545
TNC KO	74	-0.02931
TNC KO	75	-0.0309396
TNC KO	76	-0.0313336
TNC KO	77	-0.0311197
TNC KO	78	-0.0326447
TNC KO	79	-0.0353718
TNC KO	80	-0.0369789
TNC KO	81	-0.0366829
TNC KO	82	-0.0350758
TNC KO	83	-0.0350854
TNC KO	84	-0.038413
TNC KO	85	-0.0395702
TNC KO	86	-0.0394553
TNC KO	87	-0.0407273
TNC KO	88	-0.0387755
TNC KO	89	-0.0399327
TNC KO	90	-0.0414209
TNC KO	91	-0.0433295
TNC KO	92	-0.0431554
TNC KO	93	-0.0412449
TNC KO	94	-0.0400679
TNC KO	95	-0.0387927
TNC KO	96	-0.0391854
TNC KO	97	-0.0378807
TNC KO	98	-0.0334028
TNC KO	99	-0.0345564
TNC KO	100	-0.0341415
TNC KO	1	-0.00648186
TNC KO	2	-0.0134061
TNC KO	3	-0.0156476
TNC KO	4	-0.0196575
TNC KO	5	-0.00670769
TNC KO	6	-0.014219
TNC KO	7	-0.0145263
TNC KO	8	-0.012677
TNC KO	9	-0.0111218
TNC KO	10	0.0100455
TNC KO	11	0.00456469
TNC KO	12	0.0101839
TNC KO	13	0.0085572
TNC KO	14	0.0155026
TNC KO	15	0.0104277
TNC KO	16	0.00961581
TNC KO	17	0.0041436
TNC KO	18	0.0655044
TNC KO	19	0.11804
TNC KO	20	0.169429
TNC KO	21	0.403719
TNC KO	22	0.657041
TNC KO	23	0.705197
TNC KO	24	0.942885
TNC KO	25	1.01284
TNC KO	26	1.26449
TNC KO	27	1.20555
TNC KO	28	0.609233
TNC KO	29	0.832063
TNC KO	30	0.847404
TNC KO	31	0.696721
TNC KO	32	0.7266
TNC KO	33	0.939794
TNC KO	34	0.703049
TNC KO	35	0.649521
TNC KO	36	0.473342
TNC KO	37	0.335904
TNC KO	38	0.347262
TNC KO	39	0.423307
TNC KO	40	0.465953
TNC KO	41	0.345832
TNC KO	42	0.323552
TNC KO	43	0.287902
TNC KO	44	0.197052
TNC KO	45	0.267325
TNC KO	46	0.293888
TNC KO	47	0.309105
TNC KO	48	0.411033
TNC KO	49	0.339961
TNC KO	50	0.390157
TNC KO	51	0.406919
TNC KO	52	0.343359
TNC KO	53	0.367834
TNC KO	54	0.304595
TNC KO	55	0.250624
TNC KO	56	0.183694
TNC KO	57	0.167115
TNC KO	58	0.128911
TNC KO	59	0.138395
TNC KO	60	0.0689457
TNC KO	61	0.0446309
TNC KO	62	0.0474607
TNC KO	63	0.0299169
TNC KO	64	0.0176937
TNC KO	65	0.0213367
TNC KO	66	0.0158608
TNC KO	67	0.00420255
TNC KO	68	4.79472e-05
TNC KO	69	-0.0122971
TNC KO	70	-0.0236709
TNC KO	71	-0.0232227
TNC KO	72	-0.0243863
TNC KO	73	-0.0219088
TNC KO	74	-0.0203628
TNC KO	75	-0.0292019
TNC KO	76	-0.0326408
TNC KO	77	-0.0346777
TNC KO	78	-0.0403855
TNC KO	79	-0.0413657
TNC KO	80	-0.0389219
TNC KO	81	-0.0387806
TNC KO	82	-0.0397763
TNC KO	83	-0.0407388
TNC KO	84	-0.0435187
TNC KO	85	-0.0443242
TNC KO	86	-0.0425086
TNC KO	87	-0.043104
TNC KO	88	-0.0427443
TNC KO	89	-0.034149
TNC KO	90	-0.0363433
TNC KO	91	-0.0398407
TNC KO	92	-0.0420575
TNC KO	93	-0.0407011
TNC KO	94	-0.0384314
TNC KO	95	-0.0346011
TNC KO	96	-0.0352267
TNC KO	97	-0.0283614
TNC KO	98	-0.0209696
TNC KO	99	-0.00985221
TNC KO	100	0.00328364
TNC KO	1	0.00439202
TNC KO	2	0.00984717
TNC KO	3	0.00109619
TNC KO	4	-0.00472012
TNC KO	5	-0.0107245
TNC KO	6	-0.0117455
TNC KO	7	-0.0025905
TNC KO	8	-0.00564056
TNC KO	9	-0.0110841
TNC KO	10	-0.00921487
TNC KO	11	-0.0121949
TNC KO	12	-0.0116691
TNC KO	13	-0.0102426
TNC KO	14	-0.0107234
TNC KO	15	-0.00701065
TNC KO	16	-0.0105648
TNC KO	17	-0.000552745
TNC KO	18	0.0222935
TNC KO	19	0.0140144
TNC KO	20	0.0269572
TNC KO	21	0.0386441
TNC KO	22	0.0604415
TNC KO	23	0.10835
TNC KO	24	0.182169
TNC KO	25	0.212267
TNC KO	26	0.350081
TNC KO	27	0.893913
TNC KO	28	0.915488
TNC KO	29	0.866005
TNC KO	30	0.614456
TNC KO	31	0.429181
TNC KO	32	0.852373
TNC KO	33	1.00202
TNC KO	34	1.0174
TNC KO	35	0.690412
TNC KO	36	0.539252
TNC KO	37	0.807425
TNC KO	38	0.784906
TNC KO	39	0.635214
TNC KO	40	0.590277
TNC KO	41	0.658824
TNC KO	42	0.777487
TNC KO	43	0.621805
TNC KO	44	0.569767
TNC KO	45	0.663588
TNC KO	46	0.617992
TNC KO	47	0.490042
TNC KO	48	0.536947
TNC KO	49	0.504614
TNC KO	50	0.438246
TNC KO	51	0.322507
TNC KO	52	0.293292
TNC KO	53	0.286185
TNC KO	54	0.255529
TNC KO	55	0.189549
TNC KO	56	0.105778
TNC KO	57	0.146034
TNC KO	58	0.153301
TNC KO	59	0.101418
TNC KO	60	0.0685998
TNC KO	61	0.0617875
TNC KO	62	0.0297859
TNC KO	63	0.0272731
TNC KO	64	0.0176157
TNC KO	65	0.00153909
TNC KO	66	-0.00560821
TNC KO	67	-0.00625595
TNC KO	68	-0.0100716
TNC KO	69	-0.0169016
TNC KO	70	-0.0238766
TNC KO	71	-0.0303554
TNC KO	72	-0.0306559
TNC KO	73	-0.035325
TNC KO	74	-0.035671
TNC KO	75	-0.0351145
TNC KO	76	-0.0366409
TNC KO	77	-0.0367649
TNC KO	78	-0.0368541
TNC KO	79	-0.0388129
TNC KO	80	-0.0391652
TNC KO	81	-0.0392106
TNC KO	82	-0.0399777
TNC KO	83	-0.0384882
TNC KO	84	-0.0416541
TNC KO	85	-0.0430217
TNC KO	86	-0.0426071
TNC KO	87	-0.0416668
TNC KO	88	-0.0363753
TNC KO	89	-0.0411379
TNC KO	90	-0.0434964
TNC KO	91	-0.0443233
TNC KO	92	-0.039852
TNC KO	93	-0.0390512
TNC KO	94	-0.0374125
TNC KO	95	-0.0387444
TNC KO	96	-0.0315878
TNC KO	97	-0.0240374
TNC KO	98	0.00615951
TNC KO	99	0.0658205
TNC KO	100	0.090128
TNC KO	1	-0.00185439
TNC KO	2	0.00384276
TNC KO	3	0.00306732
TNC KO	4	0.00174959
TNC KO	5	0.000740739
TNC KO	6	-0.00315206
TNC KO	7	-0.0015942
TNC KO	8	0.00239676
TNC KO	9	-0.00350419
TNC KO	10	0.00246062
TNC KO	11	0.0104159
TNC KO	12	0.000678407
TNC KO	13	-0.0051508
TNC KO	14	4.86474e-05
TNC KO	15	0.0151243
TNC KO	16	0.0338033
TNC KO	17	0.0906809
TNC KO	18	0.119126
TNC KO	19	0.270101
TNC KO	20	0.471062
TNC KO	21	0.616566
TNC KO	22	0.611904
TNC KO	23	0.628536
TNC KO	24	0.76831
TNC KO	25	1.03442
TNC KO	26	0.814133
TNC KO	27	0.723566
TNC KO	28	1.00109
TNC KO	29	1.05895
TNC KO	30	0.87109
TNC KO	31	1.03103
TNC KO	32	0.990643
TNC KO	33	0.734968
TNC KO	34	0.586739
TNC KO	35	0.476537
TNC KO	36	0.386106
TNC KO	37	0.382648
TNC KO	38	0.374807
TNC KO	39	0.421248
TNC KO	40	0.411067
TNC KO	41	0.496262
TNC KO	42	0.569848
TNC KO	43	0.585953
TNC KO	44	0.392642
TNC KO	45	0.483674
TNC KO	46	0.490709
TNC KO	47	0.402041
TNC KO	48	0.354432
TNC KO	49	0.294721
TNC KO	50	0.240413
TNC KO	51	0.310032
TNC KO	52	0.324061
TNC KO	53	0.219619
TNC KO	54	0.151174
TNC KO	55	0.149394
TNC KO	56	0.158731
TNC KO	57	0.0954937
TNC KO	58	0.0680203
TNC KO	59	0.0843417
TNC KO	60	0.0827495
TNC KO	61	0.0607294
TNC KO	62	0.0338559
TNC KO	63	0.0300841
TNC KO	64	0.00917213
TNC KO	65	-0.000999636
TNC KO	66	-0.0138662
TNC KO	67	-0.0148066
TNC KO	68	-0.0187417
TNC KO	69	-0.0274322
TNC KO	70	-0.0314029
TNC KO	71	-0.027652
TNC KO	72	-0.0283643
TNC KO	73	-0.0301393
TNC KO	74	-0.0334092
TNC KO	75	-0.0379251
TNC KO	76	-0.0389783
TNC KO	77	-0.0384161
TNC KO	78	-0.0375665
TNC KO	79	-0.0373484
TNC KO	80	-0.0340654
TNC KO	81	-0.0328892
TNC KO	82	-0.0332701
TNC KO	83	-0.0391194
TNC KO	84	-0.0423667
TNC KO	85	-0.0407407
TNC KO	86	-0.0421634
TNC KO	87	-0.0432186
TNC KO	88	-0.044586
TNC KO	89	-0.0429944
TNC KO	90	-0.0422495
TNC KO	91	-0.0423164
TNC KO	92	-0.0430104
TNC KO	93	-0.0408335
TNC KO	94	-0.038946
TNC KO	95	-0.0359026
TNC KO	96	-0.0354374
TNC KO	97	-0.0340558
TNC KO	98	-0.0277484
TNC KO	99	-0.0184836
TNC KO	100	-0.00567641
TNC KO	1	0.092505
TNC KO	2	0.0714224
TNC KO	3	0.0416623
TNC KO	4	0.0421302
TNC KO	5	0.0612572
TNC KO	6	0.065716
TNC KO	7	0.0752418
TNC KO	8	0.0686235
TNC KO	9	0.0676487
TNC KO	10	0.0604869
TNC KO	11	0.0545494
TNC KO	12	0.057206
TNC KO	13	0.0440419
TNC KO	14	0.0454444
TNC KO	15	0.0513864
TNC KO	16	0.0473943
TNC KO	17	0.0609088
TNC KO	18	0.0709547
TNC KO	19	0.0838634
TNC KO	20	0.086704
TNC KO	21	0.0861099
TNC KO	22	0.0841105
TNC KO	23	0.160224
TNC KO	24	0.216516
TNC KO	25	0.333994
TNC KO	26	0.46613
TNC KO	27	0.535103
TNC KO	28	0.622131
TNC KO	29	0.518072
TNC KO	30	0.629198
TNC KO	31	0.467239
TNC KO	32	0.529526
TNC KO	33	0.51334
TNC KO	34	0.509958
TNC KO	35	0.483182
TNC KO	36	0.33817
TNC KO	37	0.386225
TNC KO	38	0.32197
TNC KO	39	0.301997
TNC KO	40	0.27475
TNC KO	41	0.297923
TNC KO	42	0.28846
TNC KO	43	0.251311
TNC KO	44	0.287081
TNC KO	45	0.286478
TNC KO	46	0.184123
TNC KO	47	0.241025
TNC KO	48	0.304899
TNC KO	49	0.341389
TNC KO	50	0.294331
TNC KO	51	0.18838
TNC KO	52	0.125746
TNC KO	53	0.125861
TNC KO	54	0.177487
TNC KO	55	0.200255
TNC KO	56	0.197065
TNC KO	57	0.115355
TNC KO	58	0.101952
TNC KO	59	0.120784
TNC KO	60	0.0896394
TNC KO	61	0.0534092
TNC KO	62	0.0419106
TNC KO	63	0.0313954
TNC KO	64	0.0216694
TNC KO	65	0.02219
TNC KO	66	0.0165714
TNC KO	67	0.0128519
TNC KO	68	0.00408638
TNC KO	69	-0.00332704
TNC KO	70	-0.00312283
TNC KO	71	-0.00921269
TNC KO	72	-0.00902556
TNC KO	73	-0.00864894
TNC KO	74	-0.010002
TNC KO	75	-0.00562501
TNC KO	76	-0.00936874
TNC KO	77	0.00165149
TNC KO	78	-6.37365e-05
TNC KO	79	0.00106817
TNC KO	80	-0.00497303
TNC KO	81	-0.00596107
TNC KO	82	-0.00923257
TNC KO	83	-0.0119042
TNC KO	84	-0.0129124
TNC KO	85	-0.0204245
TNC KO	86	-0.0207828
TNC KO	87	-0.0222048
TNC KO	88	-0.0196614
TNC KO	89	-0.0141532
TNC KO	90	-0.000613793
TNC KO	91	-0.00225619
TNC KO	92	-0.000150518
TNC KO	93	0.00320797
TNC KO	94	0.00392032
TNC KO	95	0.00722527
TNC KO	96	0.00490336
TNC KO	97	0.030558
TNC KO	98	0.0750363
TNC KO	99	0.135339
TNC KO	100	0.159054
TNC KO	1	0.0126435
TNC KO	2	0.0143486
TNC KO	3	0.013501
TNC KO	4	0.0101732
TNC KO	5	0.0181439
TNC KO	6	0.0162719
TNC KO	7	0.00819086
TNC KO	8	0.00493924
TNC KO	9	0.00877235
TNC KO	10	0.0143442
TNC KO	11	0.0217357
TNC KO	12	0.0164813
TNC KO	13	0.00852342
TNC KO	14	0.00955553
TNC KO	15	0.00855339
TNC KO	16	0.00374223
TNC KO	17	0.00814735
TNC KO	18	0.0178752
TNC KO	19	0.0197214
TNC KO	20	0.0206056
TNC KO	21	0.0411084
TNC KO	22	0.0480944
TNC KO	23	0.115623
TNC KO	24	0.188516
TNC KO	25	0.272038
TNC KO	26	0.368221
TNC KO	27	0.466201
TNC KO	28	0.509894
TNC KO	29	0.38735
TNC KO	30	0.501471
TNC KO	31	0.502882
TNC KO	32	0.63115
TNC KO	33	0.520247
TNC KO	34	0.437434
TNC KO	35	0.606021
TNC KO	36	0.574363
TNC KO	37	0.529154
TNC KO	38	0.581628
TNC KO	39	0.646526
TNC KO	40	0.579495
TNC KO	41	0.500461
TNC KO	42	0.44916
TNC KO	43	0.293201
TNC KO	44	0.402363
TNC KO	45	0.309192
TNC KO	46	0.330394
TNC KO	47	0.325802
TNC KO	48	0.26229
TNC KO	49	0.238538
TNC KO	50	0.166046
TNC KO	51	0.202752
TNC KO	52	0.184073
TNC KO	53	0.115749
TNC KO	54	0.0961466
TNC KO	55	0.0685399
TNC KO	56	0.0545938
TNC KO	57	0.0576282
TNC KO	58	0.0589923
TNC KO	59	0.046672
TNC KO	60	0.0266442
TNC KO	61	0.0232695
TNC KO	62	0.0231359
TNC KO	63	0.0163123
TNC KO	64	-0.00521714
TNC KO	65	-0.00370299
TNC KO	66	-0.0045244
TNC KO	67	-0.00932098
TNC KO	68	-0.0151195
TNC KO	69	-0.0179587
TNC KO	70	-0.0186002
TNC KO	71	-0.0239335
TNC KO	72	-0.0240736
TNC KO	73	-0.0305202
TNC KO	74	-0.0304763
TNC KO	75	-0.033546
TNC KO	76	-0.0313075
TNC KO	77	-0.033923
TNC KO	78	-0.033833
TNC KO	79	-0.033418
TNC KO	80	-0.0338414
TNC KO	81	-0.0321332
TNC KO	82	-0.0336188
TNC KO	83	-0.035751
TNC KO	84	-0.033134
TNC KO	85	-0.0339635
TNC KO	86	-0.0348425
TNC KO	87	-0.0373499
TNC KO	88	-0.0348817
TNC KO	89	-0.0355835
TNC KO	90	-0.032714
TNC KO	91	-0.033822
TNC KO	92	-0.0324044
TNC KO	93	-0.0283568
TNC KO	94	-0.0301109
TNC KO	95	-0.0277344
TNC KO	96	-0.0308387
TNC KO	97	-0.0257823
TNC KO	98	-0.0205428
TNC KO	99	-0.0144276
TNC KO	100	-0.00754781
TNC KO	1	0.029199
TNC KO	2	0.00974756
TNC KO	3	-0.00692058
TNC KO	4	-0.0231769
TNC KO	5	-0.0284384
TNC KO	6	-0.0359744
TNC KO	7	-0.0340796
TNC KO	8	-0.0368242
TNC KO	9	-0.0377572
TNC KO	10	-0.0370602
TNC KO	11	-0.0378697
TNC KO	12	-0.0360659
TNC KO	13	-0.0394618
TNC KO	14	-0.0409817
TNC KO	15	-0.0342018
TNC KO	16	-0.0360642
TNC KO	17	-0.0358762
TNC KO	18	-0.0353452
TNC KO	19	-0.035803
TNC KO	20	-0.0349014
TNC KO	21	-0.0340139
TNC KO	22	-0.0372964
TNC KO	23	-0.0359616
TNC KO	24	-0.0339213
TNC KO	25	-0.0318931
TNC KO	26	-0.0263293
TNC KO	27	-0.0152642
TNC KO	28	-0.0136257
TNC KO	29	-0.0122461
TNC KO	30	0.00731778
TNC KO	31	0.0742416
TNC KO	32	0.0960236
TNC KO	33	0.218072
TNC KO	34	0.469202
TNC KO	35	0.506278
TNC KO	36	0.479606
TNC KO	37	0.365696
TNC KO	38	0.28961
TNC KO	39	0.338068
TNC KO	40	0.296468
TNC KO	41	0.273157
TNC KO	42	0.403499
TNC KO	43	0.415181
TNC KO	44	0.437707
TNC KO	45	0.372573
TNC KO	46	0.279223
TNC KO	47	0.328016
TNC KO	48	0.26254
TNC KO	49	0.253751
TNC KO	50	0.28864
TNC KO	51	0.296744
TNC KO	52	0.286202
TNC KO	53	0.221718
TNC KO	54	0.135256
TNC KO	55	0.106753
TNC KO	56	0.0891074
TNC KO	57	0.0798023
TNC KO	58	0.130358
TNC KO	59	0.08736
TNC KO	60	0.0807782
TNC KO	61	0.0937257
TNC KO	62	0.0570498
TNC KO	63	0.0652398
TNC KO	64	0.053646
TNC KO	65	0.0342434
TNC KO	66	0.0226377
TNC KO	67	0.0182613
TNC KO	68	0.0200059
TNC KO	69	0.0146375
TNC KO	70	-0.00336567
TNC KO	71	-0.00693
TNC KO	72	-0.0109099
TNC KO	73	-0.0170467
TNC KO	74	-0.0209187
TNC KO	75	-0.0204274
TNC KO	76	-0.0228503
TNC KO	77	-0.0262288
TNC KO	78	-0.0236284
TNC KO	79	-0.0262392
TNC KO	80	-0.023311
TNC KO	81	-0.0249553
TNC KO	82	-0.0290986
TNC KO	83	-0.0339121
TNC KO	84	-0.0334105
TNC KO	85	-0.0332483
TNC KO	86	-0.0332153
TNC KO	87	-0.0311578
TNC KO	88	-0.0323414
TNC KO	89	-0.0343068
TNC KO	90	-0.0343346
TNC KO	91	-0.0362682
TNC KO	92	-0.0364338
TNC KO	93	-0.0359193
TNC KO	94	-0.034497
TNC KO	95	-0.0352967
TNC KO	96	-0.0355047
TNC KO	97	-0.0347764
TNC KO	98	-0.0277101
TNC KO	99	-0.0246523
TNC KO	100	-0.0227312
TNC KO	1	0.0616732
TNC KO	2	0.0684294
TNC KO	3	0.0805617
TNC KO	4	0.0503274
TNC KO	5	0.0374703
TNC KO	6	0.0581787
TNC KO	7	0.075464
TNC KO	8	0.0850449
TNC KO	9	0.0773988
TNC KO	10	0.061249
TNC KO	11	0.0450165
TNC KO	12	0.0315122
TNC KO	13	0.0506762
TNC KO	14	0.0607097
TNC KO	15	0.0780635
TNC KO	16	0.0438832
TNC KO	17	0.0299345
TNC KO	18	0.0190116
TNC KO	19	0.0138624
TNC KO	20	0.0198918
TNC KO	21	0.0145953
TNC KO	22	0.0237928
TNC KO	23	0.00819839
TNC KO	24	0.00704099
TNC KO	25	0.0215584
TNC KO	26	0.0309896
TNC KO	27	0.0610547
TNC KO	28	0.104737
TNC KO	29	0.231878
TNC KO	30	0.632859
TNC KO	31	0.748429
TNC KO	32	1.35895
TNC KO	33	1.33655
TNC KO	34	1.19443
TNC KO	35	1.35661
TNC KO	36	1.1263
TNC KO	37	1.43932
TNC KO	38	1.24122
TNC KO	39	0.732981
TNC KO	40	0.815956
TNC KO	41	0.929827
TNC KO	42	1.13454
TNC KO	43	0.690099
TNC KO	44	0.666824
TNC KO	45	0.893644
TNC KO	46	0.940775
TNC KO	47	0.993946
TNC KO	48	1.08257
TNC KO	49	0.904846
TNC KO	50	0.719904
TNC KO	51	0.779927
TNC KO	52	0.646049
TNC KO	53	0.422577
TNC KO	54	0.458376
TNC KO	55	0.326054
TNC KO	56	0.243263
TNC KO	57	0.227174
TNC KO	58	0.222484
TNC KO	59	0.193433
TNC KO	60	0.192661
TNC KO	61	0.151498
TNC KO	62	0.123642
TNC KO	63	0.114111
TNC KO	64	0.164835
TNC KO	65	0.130038
TNC KO	66	0.0916877
TNC KO	67	0.0840506
TNC KO	68	0.0866848
TNC KO	69	0.0592295
TNC KO	70	0.05522
TNC KO	71	0.025915
TNC KO	72	0.0200125
TNC KO	73	0.0102734
TNC KO	74	0.00314381
TNC KO	75	0.00377416
TNC KO	76	-0.000129479
TNC KO	77	-0.00790611
TNC KO	78	-0.0154483
TNC KO	79	-0.0209413
TNC KO	80	-0.0236794
TNC KO	81	-0.0254162
TNC KO	82	-0.0283319
TNC KO	83	-0.0313613
TNC KO	84	-0.033378
TNC KO	85	-0.0369034
TNC KO	86	-0.0384389
TNC KO	87	-0.0369468
TNC KO	88	-0.0366919
TNC KO	89	-0.0342245
TNC KO	90	-0.033689
TNC KO	91	-0.033422
TNC KO	92	-0.034115
TNC KO	93	-0.0352057
TNC KO	94	-0.0349361
TNC KO	95	-0.034289
TNC KO	96	-0.035974
TNC KO	97	-0.0305211
TNC KO	98	-0.0272019
TNC KO	99	-0.0147713
TNC KO	100	-0.001265
TNC KO	1	0.0444028
TNC KO	2	0.0567209
TNC KO	3	0.0524817
TNC KO	4	0.0418051
TNC KO	5	0.0615726
TNC KO	6	0.0685468
TNC KO	7	0.0304832
TNC KO	8	0.0265059
TNC KO	9	0.0353163
TNC KO	10	0.0531269
TNC KO	11	0.0361166
TNC KO	12	0.040414
TNC KO	13	0.0346855
TNC KO	14	0.0335498
TNC KO	15	0.0302488
TNC KO	16	0.0310859
TNC KO	17	0.0254594
TNC KO	18	0.0495877
TNC KO	19	0.0324665
TNC KO	20	0.0470617
TNC KO	21	0.0466143
TNC KO	22	0.089113
TNC KO	23	0.0805868
TNC KO	24	0.159203
TNC KO	25	0.213788
TNC KO	26	0.356075
TNC KO	27	0.704037
TNC KO	28	0.555461
TNC KO	29	0.680354
TNC KO	30	0.858957
TNC KO	31	1.01383
TNC KO	32	0.76878
TNC KO	33	0.839857
TNC KO	34	0.972435
TNC KO	35	0.819204
TNC KO	36	0.727847
TNC KO	37	0.719325
TNC KO	38	0.565793
TNC KO	39	0.496862
TNC KO	40	0.497353
TNC KO	41	0.372423
TNC KO	42	0.284557
TNC KO	43	0.780649
TNC KO	44	1.03956
TNC KO	45	1.13955
TNC KO	46	1.01333
TNC KO	47	0.89013
TNC KO	48	0.67312
TNC KO	49	0.505656
TNC KO	50	0.483658
TNC KO	51	0.380103
TNC KO	52	0.327776
TNC KO	53	0.370757
TNC KO	54	0.336443
TNC KO	55	0.235069
TNC KO	56	0.22943
TNC KO	57	0.279302
TNC KO	58	0.234474
TNC KO	59	0.266858
TNC KO	60	0.199448
TNC KO	61	0.181341
TNC KO	62	0.175793
TNC KO	63	0.125598
TNC KO	64	0.118343
TNC KO	65	0.114149
TNC KO	66	0.113379
TNC KO	67	0.0854857
TNC KO	68	0.05797
TNC KO	69	0.0603677
TNC KO	70	0.0407596
TNC KO	71	0.0187331
TNC KO	72	0.0132468
TNC KO	73	-0.000436461
TNC KO	74	-0.00170595
TNC KO	75	-0.00880288
TNC KO	76	-0.0165568
TNC KO	77	-0.0192822
TNC KO	78	-0.0246327
TNC KO	79	-0.030394
TNC KO	80	-0.0281877
TNC KO	81	-0.0301191
TNC KO	82	-0.0309685
TNC KO	83	-0.033637
TNC KO	84	-0.0339006
TNC KO	85	-0.0349529
TNC KO	86	-0.032097
TNC KO	87	-0.0347853
TNC KO	88	-0.0331633
TNC KO	89	-0.0324897
TNC KO	90	-0.0324169
TNC KO	91	-0.0362453
TNC KO	92	-0.0354636
TNC KO	93	-0.0359884
TNC KO	94	-0.0345846
TNC KO	95	-0.0338066
TNC KO	96	-0.0346242
TNC KO	97	-0.0268984
TNC KO	98	-0.0188201
TNC KO	99	0.00170295
TNC KO	100	0.0274729
TNC KO	1	0.142227
TNC KO	2	0.167454
TNC KO	3	0.205188
TNC KO	4	0.21309
TNC KO	5	0.16409
TNC KO	6	0.112198
TNC KO	7	0.135234
TNC KO	8	0.120062
TNC KO	9	0.145048
TNC KO	10	0.120563
TNC KO	11	0.102302
TNC KO	12	0.106995
TNC KO	13	0.123778
TNC KO	14	0.105605
TNC KO	15	0.103237
TNC KO	16	0.0699267
TNC KO	17	0.0818007
TNC KO	18	0.101696
TNC KO	19	0.0683185
TNC KO	20	0.0952934
TNC KO	21	0.089995
TNC KO	22	0.0936267
TNC KO	23	0.0913526
TNC KO	24	0.131302
TNC KO	25	0.225153
TNC KO	26	0.218637
TNC KO	27	0.283543
TNC KO	28	0.451277
TNC KO	29	0.526831
TNC KO	30	0.519859
TNC KO	31	0.551607
TNC KO	32	0.631625
TNC KO	33	0.641358
TNC KO	34	0.613109
TNC KO	35	0.543041
TNC KO	36	0.55609
TNC KO	37	0.416939
TNC KO	38	0.419976
TNC KO	39	0.441449
TNC KO	40	0.360487
TNC KO	41	0.426439
TNC KO	42	0.500416
TNC KO	43	0.47053
TNC KO	44	0.429152
TNC KO	45	0.443573
TNC KO	46	0.354214
TNC KO	47	0.3281
TNC KO	48	0.333034
TNC KO	49	0.290165
TNC KO	50	0.278908
TNC KO	51	0.249307
TNC KO	52	0.214292
TNC KO	53	0.189561
TNC KO	54	0.168571
TNC KO	55	0.152794
TNC KO	56	0.153906
TNC KO	57	0.14677
TNC KO	58	0.112346
TNC KO	59	0.120173
TNC KO	60	0.12252
TNC KO	61	0.0963417
TNC KO	62	0.0966741
TNC KO	63	0.072879
TNC KO	64	0.0437142
TNC KO	65	0.0331906
TNC KO	66	0.035606
TNC KO	67	0.0241298
TNC KO	68	0.0287225
TNC KO	69	0.0235581
TNC KO	70	0.0128398
TNC KO	71	0.00623481
TNC KO	72	0.00216403
TNC KO	73	-0.00731878
TNC KO	74	-0.00753484
TNC KO	75	-0.0178393
TNC KO	76	-0.0184294
TNC KO	77	-0.020534
TNC KO	78	-0.0248091
TNC KO	79	-0.0241065
TNC KO	80	-0.0277828
TNC KO	81	-0.0309151
TNC KO	82	-0.0319831
TNC KO	83	-0.0287844
TNC KO	84	-0.028521
TNC KO	85	-0.0300857
TNC KO	86	-0.029524
TNC KO	87	-0.024435
TNC KO	88	-0.024469
TNC KO	89	-0.0219051
TNC KO	90	-0.0237772
TNC KO	91	-0.026002
TNC KO	92	-0.0249146
TNC KO	93	-0.0265832
TNC KO	94	-0.0226877
TNC KO	95	-0.0210845
TNC KO	96	-0.0154646
TNC KO	97	-0.0149229
TNC KO	98	0.00357994
TNC KO	99	0.00984595
TNC KO	100	0.0331577
TNC KO	1	0.178106
TNC KO	2	0.116728
TNC KO	3	0.170049
TNC KO	4	0.163729
TNC KO	5	0.19285
TNC KO	6	0.180943
TNC KO	7	0.16633
TNC KO	8	0.154894
TNC KO	9	0.152684
TNC KO	10	0.158845
TNC KO	11	0.160198
TNC KO	12	0.17834
TNC KO	13	0.142334
TNC KO	14	0.0842894
TNC KO	15	0.113485
TNC KO	16	0.116515
TNC KO	17	0.0890987
TNC KO	18	0.134094
TNC KO	19	0.104711
TNC KO	20	0.0808908
TNC KO	21	0.10146
TNC KO	22	0.0904804
TNC KO	23	0.0627803
TNC KO	24	0.138722
TNC KO	25	0.140735
TNC KO	26	0.182343
TNC KO	27	0.212128
TNC KO	28	0.293911
TNC KO	29	0.407031
TNC KO	30	0.506335
TNC KO	31	0.682232
TNC KO	32	0.515289
TNC KO	33	0.553897
TNC KO	34	0.606565
TNC KO	35	0.444283
TNC KO	36	0.54152
TNC KO	37	0.574244
TNC KO	38	0.713654
TNC KO	39	0.599116
TNC KO	40	0.443067
TNC KO	41	0.555397
TNC KO	42	0.739076
TNC KO	43	0.648849
TNC KO	44	0.613279
TNC KO	45	0.59795
TNC KO	46	0.561909
TNC KO	47	0.473045
TNC KO	48	0.399623
TNC KO	49	0.352514
TNC KO	50	0.370598
TNC KO	51	0.277386
TNC KO	52	0.238497
TNC KO	53	0.214318
TNC KO	54	0.181649
TNC KO	55	0.160989
TNC KO	56	0.141225
TNC KO	57	0.114373
TNC KO	58	0.107722
TNC KO	59	0.0906235
TNC KO	60	0.0787528
TNC KO	61	0.0734125
TNC KO	62	0.0532906
TNC KO	63	0.0478423
TNC KO	64	0.0390209
TNC KO	65	0.0239563
TNC KO	66	0.0180569
TNC KO	67	0.014485
TNC KO	68	0.00389703
TNC KO	69	0.00284285
TNC KO	70	-0.00451339
TNC KO	71	-0.0159684
TNC KO	72	-0.0168289
TNC KO	73	-0.023975
TNC KO	74	-0.027677
TNC KO	75	-0.0291985
TNC KO	76	-0.0273579
TNC KO	77	-0.0248325
TNC KO	78	-0.0281541
TNC KO	79	-0.0270117
TNC KO	80	-0.0277605
TNC KO	81	-0.0308683
TNC KO	82	-0.0312869
TNC KO	83	-0.0348218
TNC KO	84	-0.0325424
TNC KO	85	-0.0341776
TNC KO	86	-0.0345125
TNC KO	87	-0.0331831
TNC KO	88	-0.0297142
TNC KO	89	-0.0323703
TNC KO	90	-0.0356815
TNC KO	91	-0.0342524
TNC KO	92	-0.0348899
TNC KO	93	-0.0335079
TNC KO	94	-0.0287651
TNC KO	95	-0.0230888
TNC KO	96	-0.0253377
TNC KO	97	-0.0208436
TNC KO	98	-0.00855841
TNC KO	99	0.0225409
TNC KO	100	0.055865
TNC KO	1	0.0785648
TNC KO	2	0.0739117
TNC KO	3	0.0945617
TNC KO	4	0.146045
TNC KO	5	0.121769
TNC KO	6	0.144897
TNC KO	7	0.123742
TNC KO	8	0.106679
TNC KO	9	0.119393
TNC KO	10	0.102817
TNC KO	11	0.0959775
TNC KO	12	0.069597
TNC KO	13	0.0771247
TNC KO	14	0.0697473
TNC KO	15	0.095425
TNC KO	16	0.091651
TNC KO	17	0.0867046
TNC KO	18	0.0837521
TNC KO	19	0.0564611
TNC KO	20	0.0641148
TNC KO	21	0.0825518
TNC KO	22	0.0618176
TNC KO	23	0.0731881
TNC KO	24	0.169863
TNC KO	25	0.11975
TNC KO	26	0.0920164
TNC KO	27	0.189947
TNC KO	28	0.190372
TNC KO	29	0.303884
TNC KO	30	0.300271
TNC KO	31	0.341681
TNC KO	32	0.3789
TNC KO	33	0.403282
TNC KO	34	0.429276
TNC KO	35	0.446453
TNC KO	36	0.412019
TNC KO	37	0.373071
TNC KO	38	0.274921
TNC KO	39	0.411016
TNC KO	40	0.360684
TNC KO	41	0.331502
TNC KO	42	0.350411
TNC KO	43	0.396542
TNC KO	44	0.309541
TNC KO	45	0.296022
TNC KO	46	0.254472
TNC KO	47	0.191608
TNC KO	48	0.209525
TNC KO	49	0.222949
TNC KO	50	0.159559
TNC KO	51	0.102794
TNC KO	52	0.0867889
TNC KO	53	0.0828705
TNC KO	54	0.0934311
TNC KO	55	0.113515
TNC KO	56	0.0836612
TNC KO	57	0.110848
TNC KO	58	0.0957341
TNC KO	59	0.081483
TNC KO	60	0.0847581
TNC KO	61	0.0737896
TNC KO	62	0.0623998
TNC KO	63	0.0490499
TNC KO	64	0.0465627
TNC KO	65	0.0421112
TNC KO	66	0.0374699
TNC KO	67	0.0260095
TNC KO	68	0.014256
TNC KO	69	0.0194673
TNC KO	70	0.0122732
TNC KO	71	0.00834291
TNC KO	72	0.00395177
TNC KO	73	-0.00323095
TNC KO	74	-0.00658915
TNC KO	75	-0.008789
TNC KO	76	-0.0136023
TNC KO	77	-0.0173272
TNC KO	78	-0.0172416
TNC KO	79	-0.0139436
TNC KO	80	-0.0206823
TNC KO	81	-0.0192698
TNC KO	82	-0.0144391
TNC KO	83	-0.0170432
TNC KO	84	-0.0173754
TNC KO	85	-0.0199741
TNC KO	86	-0.0223411
TNC KO	87	-0.0161033
TNC KO	88	-0.0235047
TNC KO	89	-0.0251374
TNC KO	90	-0.022662
TNC KO	91	-0.019364
TNC KO	92	-0.0211223
TNC KO	93	-0.00892902
TNC KO	94	-0.00918697
TNC KO	95	-0.0105937
TNC KO	96	-0.00763836
TNC KO	97	-0.00201594
TNC KO	98	0.00851183
TNC KO	99	0.0260764
[truncated: 1 more rows]

## Sheet: Fig 7 f
Type	Intensity of TNC
Control	0.889041
Control	0.989337
Control	1.00922
Control	0.93622
Control	0.927793
Control	0.823506
Control	1.03329
Control	1.1562
Control	1.33656
Control	1.4334
Control	0.958726
Control	1.0451
Control	1.20561
Control	1.11581
Control	0.849508
Control	1.35279
Control	0.760886
Control	0.687665
Control	0.798931
Control	0.690421
GFP-NCAN	0.874125
GFP-NCAN	1.14123
GFP-NCAN	1.81878
GFP-NCAN	1.08178
GFP-NCAN	1.3774
GFP-NCAN	1.59735
GFP-NCAN	1.54352
GFP-NCAN	1.65654
GFP-NCAN	1.82938
GFP-NCAN	0.974488
GFP-NCAN	1.18788
GFP-NCAN	1.24397
GFP-NCAN	1.34371
GFP-NCAN	1.04868
GFP-NCAN	1.28283
GFP-NCAN	0.988141
GFP-NCAN	1.05151
GFP-NCAN	1.05152
GFP-NCAN	1.1359
GFP-NCAN	1.06742
