# Supplementary material for: Assembly of neuron- and radial glial-cell-derived extracellular matrix molecules promotes radial migration of developing cortical neurons
Source: eLife journal article supplement (doi:10.7554/elife.92342), 2023-11-09
Supplement: fig7-figsupp1-data1 [file Numerical source data for Figure 7-figure supplement 1.xlsx]

## Sheet: Fig7 supp a
Type	X	Relative intensity
WT	1	0.396901
WT	2	0.317322
WT	3	0.264254
WT	4	0.244969
WT	5	0.250869
WT	6	0.234946
WT	7	0.233996
WT	8	0.233877
WT	9	0.232526
WT	10	0.240272
WT	11	0.244646
WT	12	0.2427
WT	13	0.245398
WT	14	0.251451
WT	15	0.26612
WT	16	0.268787
WT	17	0.277175
WT	18	0.264298
WT	19	0.254571
WT	20	0.258953
WT	21	0.278531
WT	22	0.287314
WT	23	0.268035
WT	24	0.278688
WT	25	0.279082
WT	26	0.287739
WT	27	0.306058
WT	28	0.323048
WT	29	0.334498
WT	30	0.393844
WT	31	0.532745
WT	32	0.707463
WT	33	0.811162
WT	34	0.956751
WT	35	0.89501
WT	36	0.869019
WT	37	0.859575
WT	38	1.02926
WT	39	0.952256
WT	40	0.823998
WT	41	0.918474
WT	42	0.796296
WT	43	0.715025
WT	44	0.664997
WT	45	0.66337
WT	46	0.59414
WT	47	0.638534
WT	48	0.543844
WT	49	0.571467
WT	50	0.642422
WT	51	0.701971
WT	52	0.808055
WT	53	0.758168
WT	54	0.650659
WT	55	0.644233
WT	56	0.564475
WT	57	0.528303
WT	58	0.517919
WT	59	0.443112
WT	60	0.399699
WT	61	0.408276
WT	62	0.386193
WT	63	0.351021
WT	64	0.351469
WT	65	0.309303
WT	66	0.306161
WT	67	0.322751
WT	68	0.336621
WT	69	0.298304
WT	70	0.282667
WT	71	0.257306
WT	72	0.239285
WT	73	0.2392
WT	74	0.220747
WT	75	0.203335
WT	76	0.194263
WT	77	0.1913
WT	78	0.180815
WT	79	0.174769
WT	80	0.168019
WT	81	0.167302
WT	82	0.152812
WT	83	0.150937
WT	84	0.147924
WT	85	0.150208
WT	86	0.148602
WT	87	0.153554
WT	88	0.156572
WT	89	0.164074
WT	90	0.172904
WT	91	0.182338
WT	92	0.182027
WT	93	0.17711
WT	94	0.17386
WT	95	0.176357
WT	96	0.176234
WT	97	0.18044
WT	98	0.185851
WT	99	0.22322
WT	100	0.175364
WT	1	0.221901
WT	2	0.203637
WT	3	0.19608
WT	4	0.198484
WT	5	0.200869
WT	6	0.197055
WT	7	0.197278
WT	8	0.199113
WT	9	0.197285
WT	10	0.197475
WT	11	0.192049
WT	12	0.201181
WT	13	0.197201
WT	14	0.193823
WT	15	0.190816
WT	16	0.191852
WT	17	0.188674
WT	18	0.19437
WT	19	0.193698
WT	20	0.194226
WT	21	0.193742
WT	22	0.199025
WT	23	0.209156
WT	24	0.207526
WT	25	0.226202
WT	26	0.30041
WT	27	0.395662
WT	28	0.498192
WT	29	0.669875
WT	30	0.739047
WT	31	0.899877
WT	32	0.923978
WT	33	0.870937
WT	34	0.78038
WT	35	0.865679
WT	36	0.866498
WT	37	0.834212
WT	38	0.882338
WT	39	0.977405
WT	40	0.962703
WT	41	0.935572
WT	42	1.00741
WT	43	0.955907
WT	44	0.923064
WT	45	0.974266
WT	46	0.894148
WT	47	0.810926
WT	48	0.678179
WT	49	0.53923
WT	50	0.496329
WT	51	0.467151
WT	52	0.456631
WT	53	0.384779
WT	54	0.362964
WT	55	0.36422
WT	56	0.375511
WT	57	0.385225
WT	58	0.373281
WT	59	0.335576
WT	60	0.308337
WT	61	0.298077
WT	62	0.28552
WT	63	0.282285
WT	64	0.276322
WT	65	0.250084
WT	66	0.235116
WT	67	0.244356
WT	68	0.234648
WT	69	0.221067
WT	70	0.222904
WT	71	0.201291
WT	72	0.206455
WT	73	0.214743
WT	74	0.199946
WT	75	0.187169
WT	76	0.172021
WT	77	0.184154
WT	78	0.16941
WT	79	0.165484
WT	80	0.162376
WT	81	0.162738
WT	82	0.167034
WT	83	0.15877
WT	84	0.162197
WT	85	0.169819
WT	86	0.171079
WT	87	0.174925
WT	88	0.182009
WT	89	0.18796
WT	90	0.200902
WT	91	0.208478
WT	92	0.213486
WT	93	0.206578
WT	94	0.221564
WT	95	0.213629
WT	96	0.203005
WT	97	0.203827
WT	98	0.2195
WT	99	0.296361
WT	100	0.210812
WT	1	0.316935
WT	2	0.249383
WT	3	0.221818
WT	4	0.200431
WT	5	0.195992
WT	6	0.201209
WT	7	0.197954
WT	8	0.20897
WT	9	0.209658
WT	10	0.210887
WT	11	0.219232
WT	12	0.212394
WT	13	0.207336
WT	14	0.212409
WT	15	0.213915
WT	16	0.212275
WT	17	0.194867
WT	18	0.194084
WT	19	0.200932
WT	20	0.198434
WT	21	0.199971
WT	22	0.198483
WT	23	0.202605
WT	24	0.216821
WT	25	0.226595
WT	26	0.230167
WT	27	0.273459
WT	28	0.346804
WT	29	0.499248
WT	30	0.751081
WT	31	1.07198
WT	32	1.26066
WT	33	1.31436
WT	34	1.1778
WT	35	1.22403
WT	36	1.36719
WT	37	1.12261
WT	38	0.927556
WT	39	0.775153
WT	40	0.717461
WT	41	0.569957
WT	42	0.441642
WT	43	0.323384
WT	44	0.276406
WT	45	0.329041
WT	46	0.369095
WT	47	0.484294
WT	48	0.57006
WT	49	0.616284
WT	50	0.757512
WT	51	0.990439
WT	52	0.968046
WT	53	0.86691
WT	54	0.889895
WT	55	0.808613
WT	56	0.63984
WT	57	0.611664
WT	58	0.642859
WT	59	0.569008
WT	60	0.543322
WT	61	0.548251
WT	62	0.592643
WT	63	0.456278
WT	64	0.422087
WT	65	0.41746
WT	66	0.444481
WT	67	0.42391
WT	68	0.401663
WT	69	0.337159
WT	70	0.327153
WT	71	0.324488
WT	72	0.289367
WT	73	0.283404
WT	74	0.253443
WT	75	0.271752
WT	76	0.243387
WT	77	0.248763
WT	78	0.223802
WT	79	0.214125
WT	80	0.215786
WT	81	0.20381
WT	82	0.192109
WT	83	0.193461
WT	84	0.196506
WT	85	0.175209
WT	86	0.174187
WT	87	0.169843
WT	88	0.166793
WT	89	0.162768
WT	90	0.158957
WT	91	0.155965
WT	92	0.149671
WT	93	0.160553
WT	94	0.154374
WT	95	0.1577
WT	96	0.164914
WT	97	0.169005
WT	98	0.177145
WT	99	0.222532
WT	100	0.24259
WT	1	0.43638
WT	2	0.304699
WT	3	0.251548
WT	4	0.237841
WT	5	0.241214
WT	6	0.237724
WT	7	0.24211
WT	8	0.255594
WT	9	0.261256
WT	10	0.264281
WT	11	0.255178
WT	12	0.250818
WT	13	0.251637
WT	14	0.249864
WT	15	0.24523
WT	16	0.238676
WT	17	0.232223
WT	18	0.245592
WT	19	0.241177
WT	20	0.241062
WT	21	0.247078
WT	22	0.253653
WT	23	0.297283
WT	24	0.358357
WT	25	0.496998
WT	26	0.718229
WT	27	0.991671
WT	28	1.02037
WT	29	1.24778
WT	30	1.15187
WT	31	1.1199
WT	32	1.24078
WT	33	1.32097
WT	34	1.19159
WT	35	1.18992
WT	36	0.991393
WT	37	0.852972
WT	38	0.680506
WT	39	0.591801
WT	40	0.647634
WT	41	0.595201
WT	42	0.659097
WT	43	0.78354
WT	44	0.868575
WT	45	0.930346
WT	46	0.851348
WT	47	0.892793
WT	48	0.79349
WT	49	0.760924
WT	50	0.836235
WT	51	0.694138
WT	52	0.582134
WT	53	0.548447
WT	54	0.512856
WT	55	0.532079
WT	56	0.549766
WT	57	0.504989
WT	58	0.463802
WT	59	0.43155
WT	60	0.430788
WT	61	0.408154
WT	62	0.371754
WT	63	0.323838
WT	64	0.306834
WT	65	0.31057
WT	66	0.288673
WT	67	0.287224
WT	68	0.27824
WT	69	0.271973
WT	70	0.242429
WT	71	0.237935
WT	72	0.227761
WT	73	0.21878
WT	74	0.202721
WT	75	0.197836
WT	76	0.186799
WT	77	0.179312
WT	78	0.17554
WT	79	0.178375
WT	80	0.173989
WT	81	0.167538
WT	82	0.168261
WT	83	0.171656
WT	84	0.163197
WT	85	0.169548
WT	86	0.184191
WT	87	0.179859
WT	88	0.197344
WT	89	0.196285
WT	90	0.209926
WT	91	0.208624
WT	92	0.219988
WT	93	0.212339
WT	94	0.200375
WT	95	0.183884
WT	96	0.182551
WT	97	0.189467
WT	98	0.229992
WT	99	0.233187
WT	100	0.265582
WT	1	0.258231
WT	2	0.27108
WT	3	0.29233
WT	4	0.304296
WT	5	0.31061
WT	6	0.313375
WT	7	0.314786
WT	8	0.313833
WT	9	0.306215
WT	10	0.304457
WT	11	0.289207
WT	12	0.288738
WT	13	0.285595
WT	14	0.290713
WT	15	0.269085
WT	16	0.276225
WT	17	0.261685
WT	18	0.266813
WT	19	0.267978
WT	20	0.282737
WT	21	0.269783
WT	22	0.292567
WT	23	0.334544
WT	24	0.44606
WT	25	0.615507
WT	26	0.782505
WT	27	0.80851
WT	28	0.801504
WT	29	0.879502
WT	30	0.876658
WT	31	0.914716
WT	32	1.06029
WT	33	0.941867
WT	34	0.875583
WT	35	0.802361
WT	36	0.884702
WT	37	0.74611
WT	38	0.724866
WT	39	0.742059
WT	40	0.663004
WT	41	0.634106
WT	42	0.751992
WT	43	0.705037
WT	44	0.712902
WT	45	0.685848
WT	46	0.705165
WT	47	0.782981
WT	48	0.663334
WT	49	0.688283
WT	50	0.607696
WT	51	0.553667
WT	52	0.489188
WT	53	0.468074
WT	54	0.45598
WT	55	0.447646
WT	56	0.43647
WT	57	0.428575
WT	58	0.454886
WT	59	0.446577
WT	60	0.42392
WT	61	0.411241
WT	62	0.3829
WT	63	0.395658
WT	64	0.358489
WT	65	0.361744
WT	66	0.366058
WT	67	0.332119
WT	68	0.316391
WT	69	0.282915
WT	70	0.283615
WT	71	0.292743
WT	72	0.271257
WT	73	0.262447
WT	74	0.269134
WT	75	0.250717
WT	76	0.248007
WT	77	0.232052
WT	78	0.218452
WT	79	0.210459
WT	80	0.226252
WT	81	0.221892
WT	82	0.225733
WT	83	0.219445
WT	84	0.219886
WT	85	0.220756
WT	86	0.216814
WT	87	0.226348
WT	88	0.231903
WT	89	0.235311
WT	90	0.238271
WT	91	0.243742
WT	92	0.286114
WT	93	0.305029
WT	94	0.302655
WT	95	0.335286
WT	96	0.377961
WT	97	0.40072
WT	98	0.415356
WT	99	0.509281
WT	100	0.640899
WT	1	0.28619
WT	2	0.242424
WT	3	0.233456
WT	4	0.249776
WT	5	0.262443
WT	6	0.25797
WT	7	0.278942
WT	8	0.287595
WT	9	0.30146
WT	10	0.264539
WT	11	0.290442
WT	12	0.279091
WT	13	0.282463
WT	14	0.284691
WT	15	0.276006
WT	16	0.277139
WT	17	0.2726
WT	18	0.265138
WT	19	0.286696
WT	20	0.28673
WT	21	0.341082
WT	22	0.387108
WT	23	0.57309
WT	24	0.795349
WT	25	1.1144
WT	26	1.25137
WT	27	1.33731
WT	28	1.23091
WT	29	1.03442
WT	30	0.831766
WT	31	0.706016
WT	32	0.757385
WT	33	0.7407
WT	34	0.805808
WT	35	0.722226
WT	36	0.816108
WT	37	0.848719
WT	38	0.84442
WT	39	0.903318
WT	40	0.922508
WT	41	0.757169
WT	42	0.824264
WT	43	0.760883
WT	44	0.734857
WT	45	0.761748
WT	46	0.594797
WT	47	0.588457
WT	48	0.53702
WT	49	0.524684
WT	50	0.510021
WT	51	0.473407
WT	52	0.457967
WT	53	0.432567
WT	54	0.409022
WT	55	0.407267
WT	56	0.401937
WT	57	0.370101
WT	58	0.369042
WT	59	0.329599
WT	60	0.343606
WT	61	0.315656
WT	62	0.306451
WT	63	0.332779
WT	64	0.316325
WT	65	0.275963
WT	66	0.251774
WT	67	0.255163
WT	68	0.278125
WT	69	0.250231
WT	70	0.228649
WT	71	0.205008
WT	72	0.198688
WT	73	0.229506
WT	74	0.241016
WT	75	0.220087
WT	76	0.21566
WT	77	0.212248
WT	78	0.20419
WT	79	0.197777
WT	80	0.223661
WT	81	0.213842
WT	82	0.206341
WT	83	0.209499
WT	84	0.198656
WT	85	0.195352
WT	86	0.18683
WT	87	0.1929
WT	88	0.184043
WT	89	0.201437
WT	90	0.211768
WT	91	0.20724
WT	92	0.218716
WT	93	0.209214
WT	94	0.213932
WT	95	0.231293
WT	96	0.24307
WT	97	0.249791
WT	98	0.292041
WT	99	0.340285
WT	100	0.280456
WT	1	0.594044
WT	2	0.541717
WT	3	0.537811
WT	4	0.516802
WT	5	0.505601
WT	6	0.491511
WT	7	0.500259
WT	8	0.505406
WT	9	0.504984
WT	10	0.503018
WT	11	0.510866
WT	12	0.515775
WT	13	0.516898
WT	14	0.521612
WT	15	0.511275
WT	16	0.512842
WT	17	0.516906
WT	18	0.518774
WT	19	0.53496
WT	20	0.534194
WT	21	0.516708
WT	22	0.554373
WT	23	0.562033
WT	24	0.544678
WT	25	0.542301
WT	26	0.582103
WT	27	0.629614
WT	28	0.599004
WT	29	0.682167
WT	30	0.837255
WT	31	0.923003
WT	32	0.93566
WT	33	0.939511
WT	34	0.85657
WT	35	0.892637
WT	36	0.93461
WT	37	0.989525
WT	38	1.00949
WT	39	0.886165
WT	40	0.812474
WT	41	0.822467
WT	42	0.804351
WT	43	0.897605
WT	44	0.837299
WT	45	0.864614
WT	46	0.876791
WT	47	0.918305
WT	48	0.894621
WT	49	0.799582
WT	50	0.827257
WT	51	0.747106
WT	52	0.70243
WT	53	0.638882
WT	54	0.598469
WT	55	0.587477
WT	56	0.556479
WT	57	0.527766
WT	58	0.487503
WT	59	0.515554
WT	60	0.487198
WT	61	0.464905
WT	62	0.454275
WT	63	0.439726
WT	64	0.441051
WT	65	0.413743
WT	66	0.403902
WT	67	0.401942
WT	68	0.394568
WT	69	0.379161
WT	70	0.381338
WT	71	0.370658
WT	72	0.360343
WT	73	0.356028
WT	74	0.341511
WT	75	0.335953
WT	76	0.334325
WT	77	0.329983
WT	78	0.329645
WT	79	0.31565
WT	80	0.314054
WT	81	0.305539
WT	82	0.301892
WT	83	0.295601
WT	84	0.293808
WT	85	0.298402
WT	86	0.296505
WT	87	0.299925
WT	88	0.300125
WT	89	0.305712
WT	90	0.316249
WT	91	0.318077
WT	92	0.321878
WT	93	0.328062
WT	94	0.337154
WT	95	0.343363
WT	96	0.349972
WT	97	0.366521
WT	98	0.372715
WT	99	0.402261
WT	100	0.431751
WT	1	0.513627
WT	2	0.5011
WT	3	0.508296
WT	4	0.503003
WT	5	0.502139
WT	6	0.507313
WT	7	0.502889
WT	8	0.496892
WT	9	0.498686
WT	10	0.504958
WT	11	0.512869
WT	12	0.527518
WT	13	0.520666
WT	14	0.524737
WT	15	0.515317
WT	16	0.534997
WT	17	0.535416
WT	18	0.538377
WT	19	0.548393
WT	20	0.568826
WT	21	0.538138
WT	22	0.541425
WT	23	0.564396
WT	24	0.63491
WT	25	0.650475
WT	26	0.885853
WT	27	1.01565
WT	28	1.05849
WT	29	1.34251
WT	30	1.13003
WT	31	1.22025
WT	32	1.25885
WT	33	1.26813
WT	34	1.1234
WT	35	1.06666
WT	36	1.05251
WT	37	0.972295
WT	38	0.950682
WT	39	0.925296
WT	40	0.917559
WT	41	0.929153
WT	42	1.0188
WT	43	1.06165
WT	44	1.00303
WT	45	0.927484
WT	46	0.95367
WT	47	0.920155
WT	48	0.878349
WT	49	0.733989
WT	50	0.718459
WT	51	0.703435
WT	52	0.680727
WT	53	0.636905
WT	54	0.615367
WT	55	0.55135
WT	56	0.513526
WT	57	0.549873
WT	58	0.492505
WT	59	0.479677
WT	60	0.479227
WT	61	0.48191
WT	62	0.451999
WT	63	0.450396
WT	64	0.447202
WT	65	0.44413
WT	66	0.4433
WT	67	0.429195
WT	68	0.418768
WT	69	0.407574
WT	70	0.391954
WT	71	0.394111
WT	72	0.383228
WT	73	0.375182
WT	74	0.36085
WT	75	0.351796
WT	76	0.351384
WT	77	0.32976
WT	78	0.323303
WT	79	0.315397
WT	80	0.320748
WT	81	0.313908
WT	82	0.308559
WT	83	0.310177
WT	84	0.308862
WT	85	0.304565
WT	86	0.308592
WT	87	0.320706
WT	88	0.323109
WT	89	0.32696
WT	90	0.328987
WT	91	0.337955
WT	92	0.344337
WT	93	0.354807
WT	94	0.359256
WT	95	0.377379
WT	96	0.387293
WT	97	0.392367
WT	98	0.412936
WT	99	0.442948
WT	100	0.475389
WT	1	0.618726
WT	2	0.590398
WT	3	0.575313
WT	4	0.568962
WT	5	0.589437
WT	6	0.532696
WT	7	0.544849
WT	8	0.549458
WT	9	0.574793
WT	10	0.551894
WT	11	0.552623
WT	12	0.542527
WT	13	0.532606
WT	14	0.554247
WT	15	0.525301
WT	16	0.537877
WT	17	0.548502
WT	18	0.540685
WT	19	0.586312
WT	20	0.54898
WT	21	0.530626
WT	22	0.546658
WT	23	0.603623
WT	24	0.592896
WT	25	0.628104
WT	26	0.695584
WT	27	0.742245
WT	28	0.880476
WT	29	0.990808
WT	30	0.981516
WT	31	1.11593
WT	32	0.906043
WT	33	0.879349
WT	34	0.89695
WT	35	0.876157
WT	36	0.850094
WT	37	0.771189
WT	38	0.708798
WT	39	0.66604
WT	40	0.665127
WT	41	0.660264
WT	42	0.722434
WT	43	0.792011
WT	44	0.785024
WT	45	0.802558
WT	46	0.820217
WT	47	0.77436
WT	48	0.755485
WT	49	0.733778
WT	50	0.66054
WT	51	0.623041
WT	52	0.569515
WT	53	0.54202
WT	54	0.546263
WT	55	0.547834
WT	56	0.494891
WT	57	0.488813
WT	58	0.476848
WT	59	0.450231
WT	60	0.444799
WT	61	0.446968
WT	62	0.426027
WT	63	0.420383
WT	64	0.413265
WT	65	0.409233
WT	66	0.41938
WT	67	0.41109
WT	68	0.390592
WT	69	0.379121
WT	70	0.379312
WT	71	0.371867
WT	72	0.368236
WT	73	0.355598
WT	74	0.354585
WT	75	0.350392
WT	76	0.345808
WT	77	0.34469
WT	78	0.339632
WT	79	0.33457
WT	80	0.332266
WT	81	0.334336
WT	82	0.330664
WT	83	0.326609
WT	84	0.324427
WT	85	0.328307
WT	86	0.336645
WT	87	0.341554
WT	88	0.340677
WT	89	0.345491
WT	90	0.357822
WT	91	0.361099
WT	92	0.363238
WT	93	0.36587
WT	94	0.373424
WT	95	0.386248
WT	96	0.390184
WT	97	0.394058
WT	98	0.394352
WT	99	0.39285
WT	100	0.393715
WT	1	0.558198
WT	2	0.541583
WT	3	0.586701
WT	4	0.57756
WT	5	0.577497
WT	6	0.576999
WT	7	0.569291
WT	8	0.595844
WT	9	0.602119
WT	10	0.5854
WT	11	0.613805
WT	12	0.621119
WT	13	0.592474
WT	14	0.607405
WT	15	0.589895
WT	16	0.594107
WT	17	0.569864
WT	18	0.529296
WT	19	0.57401
WT	20	0.543054
WT	21	0.527007
WT	22	0.535338
WT	23	0.535893
WT	24	0.550205
WT	25	0.54947
WT	26	0.542866
WT	27	0.591408
WT	28	0.571145
WT	29	0.626316
WT	30	0.753687
WT	31	0.759994
WT	32	0.800658
WT	33	0.999755
WT	34	1.19012
WT	35	1.06511
WT	36	1.10135
WT	37	1.12108
WT	38	1.06843
WT	39	0.986214
WT	40	1.00173
WT	41	0.948354
WT	42	0.990928
WT	43	0.871173
WT	44	0.936416
WT	45	0.995406
WT	46	0.985408
WT	47	0.961262
WT	48	0.851776
WT	49	0.726844
WT	50	0.702709
WT	51	0.712151
WT	52	0.60457
WT	53	0.574145
WT	54	0.505325
WT	55	0.530642
WT	56	0.528018
WT	57	0.508745
WT	58	0.492728
WT	59	0.470265
WT	60	0.503806
WT	61	0.515538
WT	62	0.513886
WT	63	0.514272
WT	64	0.522415
WT	65	0.493248
WT	66	0.496268
WT	67	0.482001
WT	68	0.485325
WT	69	0.481086
WT	70	0.459799
WT	71	0.419943
WT	72	0.435703
WT	73	0.448793
WT	74	0.425288
WT	75	0.417705
WT	76	0.410686
WT	77	0.401413
WT	78	0.390006
WT	79	0.39537
WT	80	0.377615
WT	81	0.362401
WT	82	0.358406
WT	83	0.35439
WT	84	0.363409
WT	85	0.364913
WT	86	0.353413
WT	87	0.363916
WT	88	0.368642
WT	89	0.385182
WT	90	0.399998
WT	91	0.415452
WT	92	0.416255
WT	93	0.427264
WT	94	0.41912
WT	95	0.438312
WT	96	0.434604
WT	97	0.454357
WT	98	0.440622
WT	99	0.471331
WT	100	0.496527
WT	1	0.579691
WT	2	0.567363
WT	3	0.557689
WT	4	0.569245
WT	5	0.53312
WT	6	0.563128
WT	7	0.529955
WT	8	0.530031
WT	9	0.527683
WT	10	0.526383
WT	11	0.539664
WT	12	0.524759
WT	13	0.523191
WT	14	0.551055
WT	15	0.563407
WT	16	0.542731
WT	17	0.520792
WT	18	0.515005
WT	19	0.511126
WT	20	0.484188
WT	21	0.521198
WT	22	0.52192
WT	23	0.505212
WT	24	0.513094
WT	25	0.551143
WT	26	0.542744
WT	27	0.584457
WT	28	0.683256
WT	29	0.734003
WT	30	0.793356
WT	31	0.824252
WT	32	0.84352
WT	33	0.841665
WT	34	0.932957
WT	35	0.97411
WT	36	0.848498
WT	37	0.792748
WT	38	0.786379
WT	39	0.736341
WT	40	0.748258
WT	41	0.750317
WT	42	0.73529
WT	43	0.710305
WT	44	0.777629
WT	45	0.748168
WT	46	0.751158
WT	47	0.765304
WT	48	0.699816
WT	49	0.709984
WT	50	0.731066
WT	51	0.628722
WT	52	0.578232
WT	53	0.567836
WT	54	0.540029
WT	55	0.531472
WT	56	0.472375
WT	57	0.473677
WT	58	0.465635
WT	59	0.452065
WT	60	0.432085
WT	61	0.423514
WT	62	0.414353
WT	63	0.421717
WT	64	0.41683
WT	65	0.411005
WT	66	0.402525
WT	67	0.393763
WT	68	0.385416
WT	69	0.385995
WT	70	0.393859
WT	71	0.379549
WT	72	0.36794
WT	73	0.365379
WT	74	0.359775
WT	75	0.35105
WT	76	0.35921
WT	77	0.337838
WT	78	0.331757
WT	79	0.325619
WT	80	0.325288
WT	81	0.317418
WT	82	0.316099
WT	83	0.317925
WT	84	0.325954
WT	85	0.325181
WT	86	0.321523
WT	87	0.328836
WT	88	0.341384
WT	89	0.346709
WT	90	0.357596
WT	91	0.37084
WT	92	0.391292
WT	93	0.393378
WT	94	0.385522
WT	95	0.397024
WT	96	0.405354
WT	97	0.425491
WT	98	0.4503
WT	99	0.461533
WT	100	0.492888
DKO	1	0.242073
DKO	2	0.226982
DKO	3	0.231359
DKO	4	0.23017
DKO	5	0.231762
DKO	6	0.251229
DKO	7	0.270945
DKO	8	0.275479
DKO	9	0.273516
DKO	10	0.276947
DKO	11	0.278792
DKO	12	0.274034
DKO	13	0.270834
DKO	14	0.255194
DKO	15	0.260445
DKO	16	0.258181
DKO	17	0.258718
DKO	18	0.26559
DKO	19	0.271456
DKO	20	0.263042
DKO	21	0.255404
DKO	22	0.262287
DKO	23	0.263054
DKO	24	0.273026
DKO	25	0.299247
DKO	26	0.336913
DKO	27	0.413654
DKO	28	0.505182
DKO	29	0.508135
DKO	30	0.517537
DKO	31	0.559109
DKO	32	0.594933
DKO	33	0.619255
DKO	34	0.598457
DKO	35	0.575035
DKO	36	0.560569
DKO	37	0.565162
DKO	38	0.524127
DKO	39	0.516524
DKO	40	0.569094
DKO	41	0.535655
DKO	42	0.531796
DKO	43	0.479467
DKO	44	0.452952
DKO	45	0.463596
DKO	46	0.453588
DKO	47	0.450391
DKO	48	0.430016
DKO	49	0.38835
DKO	50	0.426713
DKO	51	0.408812
DKO	52	0.412821
DKO	53	0.376808
DKO	54	0.348938
DKO	55	0.353429
DKO	56	0.348982
DKO	57	0.324187
DKO	58	0.313321
DKO	59	0.32239
DKO	60	0.29696
DKO	61	0.299545
DKO	62	0.278633
DKO	63	0.276269
DKO	64	0.262147
DKO	65	0.240742
DKO	66	0.249588
DKO	67	0.250016
DKO	68	0.234719
DKO	69	0.221996
DKO	70	0.212587
DKO	71	0.20219
DKO	72	0.188916
DKO	73	0.179967
DKO	74	0.18828
DKO	75	0.183722
DKO	76	0.178901
DKO	77	0.174073
DKO	78	0.165508
DKO	79	0.159244
DKO	80	0.166773
DKO	81	0.162289
DKO	82	0.173209
DKO	83	0.165938
DKO	84	0.16494
DKO	85	0.169653
DKO	86	0.169681
DKO	87	0.173784
DKO	88	0.167893
DKO	89	0.178742
DKO	90	0.183756
DKO	91	0.197954
DKO	92	0.19725
DKO	93	0.209127
DKO	94	0.248196
DKO	95	0.263102
DKO	96	0.315753
DKO	97	0.37234
DKO	98	0.46039
DKO	99	0.418895
DKO	100	0.299435
DKO	1	0.373254
DKO	2	0.348349
DKO	3	0.33925
DKO	4	0.343879
DKO	5	0.334992
DKO	6	0.350374
DKO	7	0.342899
DKO	8	0.336422
DKO	9	0.338937
DKO	10	0.366834
DKO	11	0.3516
DKO	12	0.344558
DKO	13	0.351341
DKO	14	0.34069
DKO	15	0.336922
DKO	16	0.309481
DKO	17	0.317681
DKO	18	0.313547
DKO	19	0.319075
DKO	20	0.316618
DKO	21	0.32378
DKO	22	0.325728
DKO	23	0.353635
DKO	24	0.360669
DKO	25	0.362853
DKO	26	0.457067
DKO	27	0.649327
DKO	28	0.669535
DKO	29	0.724255
DKO	30	0.702841
DKO	31	0.623927
DKO	32	0.63081
DKO	33	0.737073
DKO	34	0.70163
DKO	35	0.739682
DKO	36	0.881602
DKO	37	0.846173
DKO	38	0.804321
DKO	39	0.850601
DKO	40	0.761941
DKO	41	0.662458
DKO	42	0.628407
DKO	43	0.646967
DKO	44	0.750062
DKO	45	0.545807
DKO	46	0.481359
DKO	47	0.602119
DKO	48	0.756801
DKO	49	0.714703
DKO	50	0.61901
DKO	51	0.671068
DKO	52	0.753581
DKO	53	0.714807
DKO	54	0.647612
DKO	55	0.596396
DKO	56	0.64319
DKO	57	0.5516
DKO	58	0.533026
DKO	59	0.495507
DKO	60	0.488445
DKO	61	0.508467
DKO	62	0.473431
DKO	63	0.454022
DKO	64	0.429942
DKO	65	0.486503
DKO	66	0.46819
DKO	67	0.427968
DKO	68	0.41394
DKO	69	0.376521
DKO	70	0.373223
DKO	71	0.387077
DKO	72	0.352157
DKO	73	0.336022
DKO	74	0.326426
DKO	75	0.308795
DKO	76	0.280492
DKO	77	0.271304
DKO	78	0.269026
DKO	79	0.254914
DKO	80	0.249222
DKO	81	0.223411
DKO	82	0.218738
DKO	83	0.208116
DKO	84	0.203424
DKO	85	0.207441
DKO	86	0.205997
DKO	87	0.206794
DKO	88	0.215338
DKO	89	0.222187
DKO	90	0.235556
DKO	91	0.25128
DKO	92	0.258427
DKO	93	0.25894
DKO	94	0.251525
DKO	95	0.262571
DKO	96	0.27211
DKO	97	0.255631
DKO	98	0.269528
DKO	99	0.289712
DKO	100	0.305606
DKO	1	0.217446
DKO	2	0.22914
DKO	3	0.22549
DKO	4	0.23269
DKO	5	0.232813
DKO	6	0.239805
DKO	7	0.2475
DKO	8	0.254238
DKO	9	0.251577
DKO	10	0.245408
DKO	11	0.243546
DKO	12	0.25465
DKO	13	0.266287
DKO	14	0.248485
DKO	15	0.250761
DKO	16	0.242799
DKO	17	0.2456
DKO	18	0.231719
DKO	19	0.230353
DKO	20	0.250052
DKO	21	0.27339
DKO	22	0.284512
DKO	23	0.353286
DKO	24	0.440626
DKO	25	0.51541
DKO	26	0.622732
DKO	27	0.617632
DKO	28	0.635209
DKO	29	0.650993
DKO	30	0.656738
DKO	31	0.776288
DKO	32	0.876125
DKO	33	0.920539
DKO	34	0.860547
DKO	35	0.777086
DKO	36	0.799827
DKO	37	0.779159
DKO	38	0.717221
DKO	39	0.696946
DKO	40	0.701277
DKO	41	0.640589
DKO	42	0.605896
DKO	43	0.73722
DKO	44	0.618089
DKO	45	0.550821
DKO	46	0.570585
DKO	47	0.552341
DKO	48	0.560537
DKO	49	0.504229
DKO	50	0.489686
DKO	51	0.542025
DKO	52	0.534387
DKO	53	0.492572
DKO	54	0.486281
DKO	55	0.462601
DKO	56	0.455001
DKO	57	0.432413
DKO	58	0.419625
DKO	59	0.421377
DKO	60	0.389543
DKO	61	0.345014
DKO	62	0.366304
DKO	63	0.33466
DKO	64	0.320409
DKO	65	0.308231
DKO	66	0.309518
DKO	67	0.272115
DKO	68	0.264797
DKO	69	0.252413
DKO	70	0.243667
DKO	71	0.225349
DKO	72	0.238891
DKO	73	0.240207
DKO	74	0.230209
DKO	75	0.225226
DKO	76	0.216151
DKO	77	0.21805
DKO	78	0.216959
DKO	79	0.210697
DKO	80	0.211497
DKO	81	0.19933
DKO	82	0.192629
DKO	83	0.193931
DKO	84	0.183178
DKO	85	0.188496
DKO	86	0.19257
DKO	87	0.189869
DKO	88	0.197055
DKO	89	0.195116
DKO	90	0.201628
DKO	91	0.214256
DKO	92	0.228168
DKO	93	0.232934
DKO	94	0.249169
DKO	95	0.266241
DKO	96	0.289979
DKO	97	0.333878
DKO	98	0.418166
DKO	99	0.49173
DKO	100	0.441466
DKO	1	0.390839
DKO	2	0.320825
DKO	3	0.277173
DKO	4	0.281636
DKO	5	0.29268
DKO	6	0.294397
DKO	7	0.290911
DKO	8	0.296571
DKO	9	0.300525
DKO	10	0.293065
DKO	11	0.304516
DKO	12	0.317278
DKO	13	0.310326
DKO	14	0.307327
DKO	15	0.302162
DKO	16	0.293751
DKO	17	0.289297
DKO	18	0.27694
DKO	19	0.268698
DKO	20	0.279754
DKO	21	0.2722
DKO	22	0.290655
DKO	23	0.283664
DKO	24	0.281617
DKO	25	0.323528
DKO	26	0.383853
DKO	27	0.443824
DKO	28	0.457469
DKO	29	0.525696
DKO	30	0.517007
DKO	31	0.53271
DKO	32	0.583675
DKO	33	0.627853
DKO	34	0.705066
DKO	35	0.814721
DKO	36	0.797099
DKO	37	0.720588
DKO	38	0.755363
DKO	39	0.709812
DKO	40	0.642736
DKO	41	0.621234
DKO	42	0.648002
DKO	43	0.653566
DKO	44	0.617465
DKO	45	0.577026
DKO	46	0.572611
DKO	47	0.567126
DKO	48	0.596625
DKO	49	0.559965
DKO	50	0.531824
DKO	51	0.52991
DKO	52	0.501422
DKO	53	0.486079
DKO	54	0.484698
DKO	55	0.513132
DKO	56	0.46827
DKO	57	0.452504
DKO	58	0.453838
DKO	59	0.433729
DKO	60	0.441197
DKO	61	0.429188
DKO	62	0.419145
DKO	63	0.459173
DKO	64	0.407108
DKO	65	0.365475
DKO	66	0.338746
DKO	67	0.314038
DKO	68	0.332488
DKO	69	0.330124
DKO	70	0.324389
DKO	71	0.29902
DKO	72	0.290908
DKO	73	0.291801
DKO	74	0.283185
DKO	75	0.267787
DKO	76	0.251721
DKO	77	0.221302
DKO	78	0.224112
DKO	79	0.229191
DKO	80	0.21134
DKO	81	0.195577
DKO	82	0.225747
DKO	83	0.219805
DKO	84	0.238289
DKO	85	0.244515
DKO	86	0.22949
DKO	87	0.227992
DKO	88	0.252012
DKO	89	0.281306
DKO	90	0.299496
DKO	91	0.301136
DKO	92	0.31331
DKO	93	0.324384
DKO	94	0.305303
DKO	95	0.300765
DKO	96	0.347093
DKO	97	0.332306
DKO	98	0.3272
DKO	99	0.351176
DKO	100	0.510561
DKO	1	0.328895
DKO	2	0.321615
DKO	3	0.334937
DKO	4	0.350044
DKO	5	0.366971
DKO	6	0.371834
DKO	7	0.395404
DKO	8	0.405962
DKO	9	0.364461
DKO	10	0.357972
DKO	11	0.35077
DKO	12	0.364705
DKO	13	0.351874
DKO	14	0.337499
DKO	15	0.341635
DKO	16	0.335858
DKO	17	0.349945
DKO	18	0.358588
DKO	19	0.343185
DKO	20	0.344471
DKO	21	0.341904
DKO	22	0.354989
DKO	23	0.362434
DKO	24	0.372781
DKO	25	0.387753
DKO	26	0.393391
DKO	27	0.377939
DKO	28	0.353071
DKO	29	0.354157
DKO	30	0.35735
DKO	31	0.384274
DKO	32	0.427761
DKO	33	0.440822
DKO	34	0.410174
DKO	35	0.404763
DKO	36	0.427553
DKO	37	0.412947
DKO	38	0.383086
DKO	39	0.427579
DKO	40	0.425168
DKO	41	0.442676
DKO	42	0.421681
DKO	43	0.397212
DKO	44	0.39142
DKO	45	0.377319
DKO	46	0.376889
DKO	47	0.388109
DKO	48	0.392116
DKO	49	0.365995
DKO	50	0.335099
DKO	51	0.38573
DKO	52	0.402241
DKO	53	0.373488
DKO	54	0.419582
DKO	55	0.448331
DKO	56	0.42148
DKO	57	0.439687
DKO	58	0.416557
DKO	59	0.44312
DKO	60	0.408158
DKO	61	0.413882
DKO	62	0.451071
DKO	63	0.418509
DKO	64	0.41487
DKO	65	0.396058
DKO	66	0.409865
DKO	67	0.379205
DKO	68	0.387242
DKO	69	0.375991
DKO	70	0.349105
DKO	71	0.341342
DKO	72	0.354903
DKO	73	0.345588
DKO	74	0.340742
DKO	75	0.32424
DKO	76	0.301454
DKO	77	0.28926
DKO	78	0.278382
DKO	79	0.278889
DKO	80	0.279522
DKO	81	0.268254
DKO	82	0.269804
DKO	83	0.271886
DKO	84	0.253038
DKO	85	0.274993
DKO	86	0.27945
DKO	87	0.258587
DKO	88	0.256167
DKO	89	0.263757
DKO	90	0.270878
DKO	91	0.298247
DKO	92	0.328033
DKO	93	0.392461
DKO	94	0.378796
DKO	95	0.366857
DKO	96	0.364705
DKO	97	0.393271
DKO	98	0.470982
DKO	99	0.549371
DKO	100	0.63114
DKO	1	0.556272
DKO	2	0.445678
DKO	3	0.397971
DKO	4	0.390854
DKO	5	0.397589
DKO	6	0.42991
DKO	7	0.436889
DKO	8	0.461384
DKO	9	0.456482
DKO	10	0.507212
DKO	11	0.48805
DKO	12	0.486457
DKO	13	0.463209
DKO	14	0.459744
DKO	15	0.448969
DKO	16	0.439001
DKO	17	0.436794
DKO	18	0.463763
DKO	19	0.49391
DKO	20	0.429697
DKO	21	0.427476
DKO	22	0.468229
DKO	23	0.484061
DKO	24	0.512595
DKO	25	0.563123
DKO	26	0.587167
DKO	27	0.565358
DKO	28	0.574386
DKO	29	0.539986
DKO	30	0.464941
DKO	31	0.419242
DKO	32	0.389663
DKO	33	0.404394
DKO	34	0.433615
DKO	35	0.464327
DKO	36	0.457133
DKO	37	0.475366
DKO	38	0.507029
DKO	39	0.526722
DKO	40	0.511552
DKO	41	0.547409
DKO	42	0.459426
DKO	43	0.411801
DKO	44	0.39233
DKO	45	0.366202
DKO	46	0.377177
DKO	47	0.376843
DKO	48	0.383864
DKO	49	0.389928
DKO	50	0.376041
DKO	51	0.419188
DKO	52	0.429324
DKO	53	0.452436
DKO	54	0.426283
DKO	55	0.437868
DKO	56	0.448441
DKO	57	0.451383
DKO	58	0.468993
DKO	59	0.468409
DKO	60	0.420996
DKO	61	0.439859
DKO	62	0.468556
DKO	63	0.413845
DKO	64	0.424205
DKO	65	0.418046
DKO	66	0.385552
DKO	67	0.406951
DKO	68	0.358193
DKO	69	0.368536
DKO	70	0.349906
DKO	71	0.329847
DKO	72	0.351694
DKO	73	0.324401
DKO	74	0.314409
DKO	75	0.31022
DKO	76	0.291926
DKO	77	0.262033
DKO	78	0.263144
DKO	79	0.245851
DKO	80	0.240216
DKO	81	0.231406
DKO	82	0.23948
DKO	83	0.236606
DKO	84	0.230497
DKO	85	0.238886
DKO	86	0.25227
DKO	87	0.263872
DKO	88	0.274982
DKO	89	0.288977
DKO	90	0.338353
DKO	91	0.372951
DKO	92	0.363629
DKO	93	0.359266
DKO	94	0.373765
DKO	95	0.380663
DKO	96	0.386254
DKO	97	0.365679
DKO	98	0.396023
DKO	99	0.446501
DKO	100	0.332578
DKO	1	0.506063
DKO	2	0.491767
DKO	3	0.501207
DKO	4	0.518294
DKO	5	0.533118
DKO	6	0.478003
DKO	7	0.48104
DKO	8	0.479062
DKO	9	0.47
DKO	10	0.494854
DKO	11	0.481188
DKO	12	0.512617
DKO	13	0.525166
DKO	14	0.55905
DKO	15	0.569459
DKO	16	0.58426
DKO	17	0.545465
DKO	18	0.57707
DKO	19	0.525821
DKO	20	0.58426
DKO	21	0.521732
DKO	22	0.50798
DKO	23	0.501061
DKO	24	0.565774
DKO	25	0.560985
DKO	26	0.572617
DKO	27	0.605287
DKO	28	0.583917
DKO	29	0.63048
DKO	30	0.589833
DKO	31	0.597703
DKO	32	0.692346
DKO	33	0.658764
DKO	34	0.604761
DKO	35	0.625745
DKO	36	0.657557
DKO	37	0.633062
DKO	38	0.63237
DKO	39	0.671843
DKO	40	0.695166
DKO	41	0.656333
DKO	42	0.610429
DKO	43	0.576519
DKO	44	0.518171
DKO	45	0.544321
DKO	46	0.544932
DKO	47	0.490935
DKO	48	0.491267
DKO	49	0.542167
DKO	50	0.538773
DKO	51	0.520437
DKO	52	0.510135
DKO	53	0.48903
DKO	54	0.495945
DKO	55	0.524264
DKO	56	0.533581
DKO	57	0.505397
DKO	58	0.483835
DKO	59	0.478196
DKO	60	0.46512
DKO	61	0.488906
DKO	62	0.481346
DKO	63	0.46576
DKO	64	0.447988
DKO	65	0.433145
DKO	66	0.419271
DKO	67	0.412844
DKO	68	0.416089
DKO	69	0.425751
DKO	70	0.418828
DKO	71	0.425894
DKO	72	0.415317
DKO	73	0.416681
DKO	74	0.406775
DKO	75	0.392633
DKO	76	0.383669
DKO	77	0.361131
DKO	78	0.356981
DKO	79	0.345226
DKO	80	0.333802
DKO	81	0.338399
DKO	82	0.334648
DKO	83	0.328296
DKO	84	0.323011
DKO	85	0.316757
DKO	86	0.313191
DKO	87	0.306042
DKO	88	0.302369
DKO	89	0.301262
DKO	90	0.300592
DKO	91	0.306921
DKO	92	0.308556
DKO	93	0.318917
DKO	94	0.325537
DKO	95	0.329841
DKO	96	0.338351
DKO	97	0.343622
DKO	98	0.358625
DKO	99	0.380506
DKO	100	0.390873
DKO	1	0.440254
DKO	2	0.39583
DKO	3	0.376266
DKO	4	0.380772
DKO	5	0.389085
DKO	6	0.402146
DKO	7	0.392251
DKO	8	0.395172
DKO	9	0.395987
DKO	10	0.398157
DKO	11	0.400598
DKO	12	0.40046
DKO	13	0.407402
DKO	14	0.41731
DKO	15	0.407617
DKO	16	0.402474
DKO	17	0.4014
DKO	18	0.386156
DKO	19	0.387358
DKO	20	0.396698
DKO	21	0.399215
DKO	22	0.409124
DKO	23	0.423063
DKO	24	0.41355
DKO	25	0.41593
DKO	26	0.430976
DKO	27	0.481893
DKO	28	0.552358
DKO	29	0.611695
DKO	30	0.657371
DKO	31	0.773373
DKO	32	0.890693
DKO	33	0.938899
DKO	34	0.963613
DKO	35	0.849877
DKO	36	0.733608
DKO	37	0.715734
DKO	38	0.632683
DKO	39	0.587633
DKO	40	0.580572
DKO	41	0.661116
DKO	42	0.610782
DKO	43	0.641575
DKO	44	0.63854
DKO	45	0.692397
DKO	46	0.645527
DKO	47	0.700668
DKO	48	0.719616
DKO	49	0.658802
DKO	50	0.629924
DKO	51	0.620464
DKO	52	0.632171
DKO	53	0.631211
DKO	54	0.533614
DKO	55	0.5807
DKO	56	0.499127
DKO	57	0.492666
DKO	58	0.467219
DKO	59	0.448297
DKO	60	0.434234
DKO	61	0.427345
DKO	62	0.401968
DKO	63	0.412091
DKO	64	0.385556
DKO	65	0.408299
DKO	66	0.438434
DKO	67	0.465139
DKO	68	0.435653
DKO	69	0.44389
DKO	70	0.448398
DKO	71	0.470319
DKO	72	0.43171
DKO	73	0.416846
DKO	74	0.413489
DKO	75	0.412855
DKO	76	0.483177
DKO	77	0.471489
DKO	78	0.46161
DKO	79	0.425377
DKO	80	0.424981
DKO	81	0.412534
DKO	82	0.399256
DKO	83	0.360417
DKO	84	0.365769
DKO	85	0.344709
DKO	86	0.339967
DKO	87	0.325683
DKO	88	0.314244
DKO	89	0.314181
DKO	90	0.311153
DKO	91	0.315719
DKO	92	0.306998
DKO	93	0.307051
DKO	94	0.306387
DKO	95	0.312878
DKO	96	0.319273
DKO	97	0.319965
DKO	98	0.328682
DKO	99	0.340683
DKO	100	0.35044
DKO	1	0.477953
DKO	2	0.47153
DKO	3	0.466987
DKO	4	0.473283
DKO	5	0.485564
DKO	6	0.49252
DKO	7	0.47185
DKO	8	0.499919
DKO	9	0.475859
DKO	10	0.466754
DKO	11	0.491907
DKO	12	0.490381
DKO	13	0.493979
DKO	14	0.480841
DKO	15	0.492946
DKO	16	0.491892
DKO	17	0.470495
DKO	18	0.485253
DKO	19	0.479202
DKO	20	0.488832
DKO	21	0.497633
DKO	22	0.569341
DKO	23	0.68104
DKO	24	0.634752
DKO	25	0.684461
DKO	26	0.671825
DKO	27	0.720129
DKO	28	0.702476
DKO	29	0.628961
DKO	30	0.590044
DKO	31	0.61974
DKO	32	0.595713
DKO	33	0.55667
DKO	34	0.558703
DKO	35	0.536037
DKO	36	0.510672
DKO	37	0.496042
DKO	38	0.470408
DKO	39	0.494259
DKO	40	0.491412
DKO	41	0.470011
DKO	42	0.467348
DKO	43	0.468377
DKO	44	0.504373
DKO	45	0.509896
DKO	46	0.514743
DKO	47	0.501875
DKO	48	0.488589
DKO	49	0.459118
DKO	50	0.46688
DKO	51	0.431401
DKO	52	0.414714
DKO	53	0.417673
DKO	54	0.402147
DKO	55	0.414795
DKO	56	0.41421
DKO	57	0.400565
DKO	58	0.419953
DKO	59	0.419985
DKO	60	0.419622
DKO	61	0.409458
DKO	62	0.388197
DKO	63	0.389269
DKO	64	0.370565
DKO	65	0.388738
DKO	66	0.406756
DKO	67	0.404663
DKO	68	0.437461
DKO	69	0.435727
DKO	70	0.422903
DKO	71	0.416986
DKO	72	0.426151
DKO	73	0.39618
DKO	74	0.391412
DKO	75	0.39604
DKO	76	0.391209
DKO	77	0.383558
DKO	78	0.384528
DKO	79	0.372424
DKO	80	0.358608
DKO	81	0.355426
DKO	82	0.356653
DKO	83	0.345432
DKO	84	0.345952
DKO	85	0.346757
DKO	86	0.34608
DKO	87	0.338718
DKO	88	0.338772
DKO	89	0.350966
DKO	90	0.362881
DKO	91	0.374367
DKO	92	0.394335
DKO	93	0.398081
DKO	94	0.406499
DKO	95	0.421389
DKO	96	0.41163
DKO	97	0.424891
DKO	98	0.429924
DKO	99	0.48499
[truncated: 201 more rows]

## Sheet: Fig7 supp b
Type	X	Relative intensity
WT	1	0.564935
WT	2	0.46951
WT	3	0.483745
WT	4	0.477522
WT	5	0.510771
WT	6	0.495534
WT	7	0.548565
WT	8	0.509355
WT	9	0.505943
WT	10	0.521479
WT	11	0.543531
WT	12	0.545416
WT	13	0.534762
WT	14	0.51742
WT	15	0.551116
WT	16	0.56449
WT	17	0.589664
WT	18	0.543106
WT	19	0.525552
WT	20	0.577425
WT	21	0.545308
WT	22	0.559085
WT	23	0.622083
WT	24	0.660008
WT	25	0.679581
WT	26	0.732152
WT	27	0.650522
WT	28	0.613483
WT	29	0.646685
WT	30	0.572071
WT	31	0.622758
WT	32	0.603067
WT	33	0.597239
WT	34	0.54263
WT	35	0.52393
WT	36	0.497244
WT	37	0.519619
WT	38	0.50572
WT	39	0.435132
WT	40	0.45339
WT	41	0.451707
WT	42	0.427914
WT	43	0.420604
WT	44	0.412094
WT	45	0.446699
WT	46	0.380897
WT	47	0.357862
WT	48	0.418534
WT	49	0.400671
WT	50	0.370622
WT	51	0.389305
WT	52	0.376785
WT	53	0.398158
WT	54	0.393714
WT	55	0.379245
WT	56	0.346198
WT	57	0.395434
WT	58	0.390251
WT	59	0.374488
WT	60	0.357367
WT	61	0.338852
WT	62	0.308858
WT	63	0.321605
WT	64	0.330104
WT	65	0.301259
WT	66	0.306316
WT	67	0.296859
WT	68	0.309219
WT	69	0.296776
WT	70	0.30568
WT	71	0.292122
WT	72	0.285742
WT	73	0.290254
WT	74	0.302888
WT	75	0.33178
WT	76	0.325441
WT	77	0.36727
WT	78	0.399584
WT	79	0.448986
WT	80	0.484375
WT	81	0.44379
WT	82	0.463522
WT	83	0.499866
WT	84	0.499558
WT	85	0.530661
WT	86	0.53744
WT	87	0.528555
WT	88	0.543929
WT	89	0.561957
WT	90	0.589215
WT	91	0.571025
WT	92	0.59215
WT	93	0.590648
WT	94	0.563551
WT	95	0.590047
WT	96	0.566198
WT	97	0.617982
WT	98	0.676778
WT	99	0.7633
WT	100	0.836599
WT	1	0.52157
WT	2	0.464051
WT	3	0.412397
WT	4	0.394325
WT	5	0.424863
WT	6	0.414298
WT	7	0.42203
WT	8	0.399113
WT	9	0.386432
WT	10	0.371547
WT	11	0.370192
WT	12	0.356298
WT	13	0.381798
WT	14	0.419719
WT	15	0.396372
WT	16	0.343123
WT	17	0.321751
WT	18	0.319255
WT	19	0.328237
WT	20	0.333636
WT	21	0.356496
WT	22	0.42536
WT	23	0.545351
WT	24	0.646048
WT	25	0.712827
WT	26	0.774266
WT	27	0.874476
WT	28	0.748405
WT	29	0.849097
WT	30	0.866455
WT	31	0.802482
WT	32	0.951206
WT	33	0.965158
WT	34	0.814916
WT	35	0.898717
WT	36	0.873638
WT	37	0.764531
WT	38	0.860247
WT	39	0.634458
WT	40	0.660482
WT	41	0.67453
WT	42	0.5634
WT	43	0.501329
WT	44	0.466361
WT	45	0.448589
WT	46	0.408684
WT	47	0.411905
WT	48	0.446565
WT	49	0.390694
WT	50	0.374684
WT	51	0.358966
WT	52	0.340204
WT	53	0.334412
WT	54	0.348721
WT	55	0.338332
WT	56	0.328297
WT	57	0.316238
WT	58	0.321927
WT	59	0.322279
WT	60	0.313672
WT	61	0.292049
WT	62	0.293807
WT	63	0.274847
WT	64	0.283277
WT	65	0.276313
WT	66	0.280644
WT	67	0.269127
WT	68	0.26916
WT	69	0.28063
WT	70	0.279437
WT	71	0.288635
WT	72	0.275255
WT	73	0.309308
WT	74	0.314245
WT	75	0.350829
WT	76	0.306148
WT	77	0.279398
WT	78	0.300139
WT	79	0.286257
WT	80	0.310542
WT	81	0.324574
WT	82	0.344704
WT	83	0.358445
WT	84	0.402277
WT	85	0.388303
WT	86	0.434364
WT	87	0.441157
WT	88	0.43026
WT	89	0.515502
WT	90	0.479569
WT	91	0.475963
WT	92	0.501107
WT	93	0.585939
WT	94	0.620798
WT	95	0.653522
WT	96	0.639262
WT	97	0.59232
WT	98	0.646993
WT	99	0.690999
WT	100	0.78025
WT	1	0.498937
WT	2	0.452115
WT	3	0.429196
WT	4	0.404704
WT	5	0.438108
WT	6	0.428174
WT	7	0.367932
WT	8	0.383102
WT	9	0.402159
WT	10	0.33394
WT	11	0.367898
WT	12	0.361813
WT	13	0.383876
WT	14	0.4095
WT	15	0.503034
WT	16	0.452767
WT	17	0.54566
WT	18	0.644384
WT	19	0.750359
WT	20	0.96988
WT	21	0.820241
WT	22	0.751854
WT	23	0.996143
WT	24	0.948543
WT	25	0.691538
WT	26	0.68604
WT	27	0.769746
WT	28	0.717146
WT	29	0.598812
WT	30	0.607388
WT	31	0.482439
WT	32	0.52558
WT	33	0.554849
WT	34	0.470332
WT	35	0.437205
WT	36	0.374197
WT	37	0.415544
WT	38	0.404722
WT	39	0.386812
WT	40	0.370175
WT	41	0.382532
WT	42	0.310819
WT	43	0.324817
WT	44	0.309694
WT	45	0.34453
WT	46	0.321261
WT	47	0.389333
WT	48	0.356735
WT	49	0.311966
WT	50	0.326505
WT	51	0.313979
WT	52	0.295075
WT	53	0.311071
WT	54	0.34344
WT	55	0.322391
WT	56	0.28476
WT	57	0.297412
WT	58	0.272404
WT	59	0.301103
WT	60	0.306822
WT	61	0.394797
WT	62	0.287762
WT	63	0.28454
WT	64	0.296966
WT	65	0.299638
WT	66	0.341455
WT	67	0.330052
WT	68	0.327876
WT	69	0.316864
WT	70	0.32237
WT	71	0.33877
WT	72	0.391576
WT	73	0.375057
WT	74	0.413816
WT	75	0.427733
WT	76	0.387913
WT	77	0.383718
WT	78	0.402322
WT	79	0.408241
WT	80	0.438883
WT	81	0.421392
WT	82	0.444993
WT	83	0.430649
WT	84	0.484736
WT	85	0.525562
WT	86	0.514938
WT	87	0.537406
WT	88	0.542051
WT	89	0.584062
WT	90	0.61648
WT	91	0.656109
WT	92	0.579441
WT	93	0.602907
WT	94	0.66143
WT	95	0.613007
WT	96	0.675755
WT	97	0.664467
WT	98	0.771843
WT	99	0.743524
WT	100	0.69256
WT	1	0.472531
WT	2	0.430628
WT	3	0.395146
WT	4	0.401257
WT	5	0.39354
WT	6	0.380339
WT	7	0.385321
WT	8	0.398167
WT	9	0.374141
WT	10	0.382045
WT	11	0.39733
WT	12	0.369175
WT	13	0.403991
WT	14	0.401861
WT	15	0.396008
WT	16	0.364847
WT	17	0.373312
WT	18	0.388498
WT	19	0.364395
WT	20	0.401695
WT	21	0.427864
WT	22	0.453414
WT	23	0.451639
WT	24	0.521516
WT	25	0.573071
WT	26	0.740259
WT	27	0.819257
WT	28	0.775289
WT	29	0.878052
WT	30	0.866119
WT	31	0.814869
WT	32	0.784871
WT	33	0.920251
WT	34	0.68227
WT	35	0.802848
WT	36	0.876934
WT	37	0.813048
WT	38	1.03457
WT	39	0.917907
WT	40	0.903166
WT	41	0.922056
WT	42	0.82249
WT	43	0.776382
WT	44	0.760909
WT	45	0.665588
WT	46	0.62233
WT	47	0.56479
WT	48	0.515608
WT	49	0.466482
WT	50	0.43841
WT	51	0.442653
WT	52	0.446274
WT	53	0.469491
WT	54	0.395701
WT	55	0.414546
WT	56	0.391182
WT	57	0.387697
WT	58	0.389521
WT	59	0.360635
WT	60	0.394581
WT	61	0.367729
WT	62	0.382317
WT	63	0.352802
WT	64	0.358603
WT	65	0.373268
WT	66	0.400382
WT	67	0.37803
WT	68	0.347238
WT	69	0.346603
WT	70	0.352059
WT	71	0.346273
WT	72	0.310467
WT	73	0.337146
WT	74	0.345049
WT	75	0.305551
WT	76	0.329432
WT	77	0.329732
WT	78	0.366207
WT	79	0.342779
WT	80	0.354939
WT	81	0.379623
WT	82	0.385195
WT	83	0.41923
WT	84	0.440219
WT	85	0.507883
WT	86	0.493029
WT	87	0.504143
WT	88	0.534452
WT	89	0.525509
WT	90	0.534411
WT	91	0.607189
WT	92	0.59335
WT	93	0.623841
WT	94	0.628183
WT	95	0.698112
WT	96	0.728702
WT	97	0.756789
WT	98	0.729975
WT	99	0.793173
WT	100	0.900979
WT	1	0.747411
WT	2	0.684549
WT	3	0.784293
WT	4	0.717717
WT	5	0.668233
WT	6	0.603108
WT	7	0.523028
WT	8	0.677656
WT	9	0.725098
WT	10	0.605283
WT	11	0.52319
WT	12	0.5463
WT	13	0.558434
WT	14	0.662407
WT	15	0.567313
WT	16	0.558075
WT	17	0.566658
WT	18	0.645967
WT	19	0.724009
WT	20	0.613981
WT	21	0.658547
WT	22	0.689807
WT	23	0.746166
WT	24	0.912045
WT	25	1.08854
WT	26	1.33822
WT	27	1.41924
WT	28	1.12749
WT	29	1.11298
WT	30	1.04743
WT	31	1.06085
WT	32	1.36122
WT	33	1.29557
WT	34	1.20991
WT	35	0.978145
WT	36	0.955816
WT	37	0.757867
WT	38	0.660543
WT	39	0.75957
WT	40	0.745508
WT	41	0.618933
WT	42	0.594612
WT	43	0.602518
WT	44	0.547918
WT	45	0.453961
WT	46	0.525186
WT	47	0.557895
WT	48	0.510401
WT	49	0.526409
WT	50	0.532107
WT	51	0.490118
WT	52	0.469385
WT	53	0.430426
WT	54	0.472477
WT	55	0.439425
WT	56	0.396596
WT	57	0.49171
WT	58	0.405001
WT	59	0.422956
WT	60	0.449395
WT	61	0.424541
WT	62	0.384733
WT	63	0.346653
WT	64	0.384702
WT	65	0.382065
WT	66	0.385169
WT	67	0.390272
WT	68	0.386748
WT	69	0.387948
WT	70	0.381584
WT	71	0.394092
WT	72	0.427184
WT	73	0.426162
WT	74	0.455812
WT	75	0.48168
WT	76	0.488785
WT	77	0.558904
WT	78	0.562774
WT	79	0.583526
WT	80	0.558364
WT	81	0.54213
WT	82	0.589679
WT	83	0.552551
WT	84	0.587705
WT	85	0.570855
WT	86	0.642179
WT	87	0.607495
WT	88	0.599941
WT	89	0.635342
WT	90	0.61493
WT	91	0.689093
WT	92	0.703807
WT	93	0.713623
WT	94	0.817317
WT	95	0.864861
WT	96	0.810108
WT	97	0.864952
WT	98	0.832588
WT	99	0.792549
WT	100	0.615563
WT	1	0.561362
WT	2	0.568051
WT	3	0.576694
WT	4	0.728434
WT	5	0.739906
WT	6	0.788379
WT	7	0.744442
WT	8	0.565323
WT	9	0.555522
WT	10	0.576123
WT	11	0.548788
WT	12	0.557512
WT	13	0.582909
WT	14	0.602801
WT	15	0.659483
WT	16	0.655046
WT	17	0.639788
WT	18	0.65014
WT	19	0.541343
WT	20	0.47005
WT	21	0.653046
WT	22	0.694862
WT	23	0.636281
WT	24	0.678198
WT	25	0.766952
WT	26	1.12457
WT	27	1.21549
WT	28	1.34846
WT	29	1.29927
WT	30	1.20071
WT	31	0.780315
WT	32	1.07376
WT	33	1.1397
WT	34	1.57291
WT	35	1.40033
WT	36	1.41616
WT	37	1.37251
WT	38	1.22175
WT	39	1.02909
WT	40	0.943231
WT	41	1.08952
WT	42	1.10624
WT	43	1.10067
WT	44	0.91911
WT	45	0.837578
WT	46	0.802242
WT	47	0.665771
WT	48	0.616266
WT	49	0.602067
WT	50	0.556566
WT	51	0.586611
WT	52	0.581741
WT	53	0.5379
WT	54	0.579052
WT	55	0.58376
WT	56	0.501427
WT	57	0.510927
WT	58	0.579669
WT	59	0.517344
WT	60	0.470557
WT	61	0.497143
WT	62	0.4743
WT	63	0.426094
WT	64	0.457226
WT	65	0.492048
WT	66	0.447826
WT	67	0.463782
WT	68	0.425113
WT	69	0.463035
WT	70	0.395577
WT	71	0.409845
WT	72	0.411727
WT	73	0.440798
WT	74	0.414621
WT	75	0.400978
WT	76	0.415431
WT	77	0.426147
WT	78	0.438525
WT	79	0.474439
WT	80	0.522887
WT	81	0.498128
WT	82	0.471135
WT	83	0.518191
WT	84	0.580092
WT	85	0.561439
WT	86	0.631975
WT	87	0.625324
WT	88	0.619692
WT	89	0.67106
WT	90	0.696066
WT	91	0.668165
WT	92	0.629211
WT	93	0.633632
WT	94	0.61854
WT	95	0.741913
WT	96	0.776976
WT	97	0.765078
WT	98	0.787963
WT	99	0.928853
WT	100	1.01706
WT	1	0.500413
WT	2	0.557875
WT	3	0.468313
WT	4	0.537319
WT	5	0.599782
WT	6	0.614105
WT	7	0.615152
WT	8	0.523795
WT	9	0.552859
WT	10	0.644514
WT	11	0.566536
WT	12	0.572527
WT	13	0.565222
WT	14	0.51678
WT	15	0.541546
WT	16	0.560403
WT	17	0.621162
WT	18	0.60685
WT	19	0.578517
WT	20	0.794611
WT	21	1.02374
WT	22	1.67386
WT	23	1.76975
WT	24	1.78816
WT	25	1.74433
WT	26	1.40628
WT	27	1.25127
WT	28	1.25613
WT	29	1.17062
WT	30	1.1776
WT	31	1.17329
WT	32	1.61748
WT	33	1.45873
WT	34	1.4937
WT	35	1.59546
WT	36	1.16728
WT	37	0.941901
WT	38	0.804119
WT	39	0.946942
WT	40	0.833296
WT	41	0.666689
WT	42	0.647207
WT	43	0.581024
WT	44	0.605996
WT	45	0.530186
WT	46	0.464265
WT	47	0.491783
WT	48	0.533649
WT	49	0.398988
WT	50	0.459878
WT	51	0.448729
WT	52	0.420613
WT	53	0.467034
WT	54	0.45305
WT	55	0.456272
WT	56	0.460899
WT	57	0.439455
WT	58	0.446258
WT	59	0.378319
WT	60	0.361557
WT	61	0.385164
WT	62	0.363548
WT	63	0.429454
WT	64	0.403767
WT	65	0.386322
WT	66	0.413273
WT	67	0.393377
WT	68	0.37675
WT	69	0.367996
WT	70	0.371144
WT	71	0.382155
WT	72	0.372756
WT	73	0.369266
WT	74	0.394218
WT	75	0.392952
WT	76	0.367191
WT	77	0.474507
WT	78	0.482029
WT	79	0.497998
WT	80	0.48844
WT	81	0.474341
WT	82	0.549948
WT	83	0.604197
WT	84	0.5453
WT	85	0.570529
WT	86	0.5872
WT	87	0.587278
WT	88	0.597551
WT	89	0.594229
WT	90	0.640685
WT	91	0.659308
WT	92	0.602746
WT	93	0.632964
WT	94	0.653604
WT	95	0.680602
WT	96	0.771861
WT	97	0.709564
WT	98	0.629465
WT	99	0.703034
WT	100	0.708309
NCAN KO	1	0.216311
NCAN KO	2	0.208945
NCAN KO	3	0.202546
NCAN KO	4	0.209957
NCAN KO	5	0.211898
NCAN KO	6	0.206239
NCAN KO	7	0.210206
NCAN KO	8	0.207525
NCAN KO	9	0.215412
NCAN KO	10	0.22609
NCAN KO	11	0.220529
NCAN KO	12	0.216333
NCAN KO	13	0.238412
NCAN KO	14	0.234757
NCAN KO	15	0.239907
NCAN KO	16	0.24323
NCAN KO	17	0.249301
NCAN KO	18	0.249456
NCAN KO	19	0.247673
NCAN KO	20	0.245108
NCAN KO	21	0.237012
NCAN KO	22	0.238772
NCAN KO	23	0.260365
NCAN KO	24	0.299404
NCAN KO	25	0.309677
NCAN KO	26	0.303683
NCAN KO	27	0.318123
NCAN KO	28	0.323004
NCAN KO	29	0.291543
NCAN KO	30	0.292856
NCAN KO	31	0.300884
NCAN KO	32	0.303907
NCAN KO	33	0.302
NCAN KO	34	0.330914
NCAN KO	35	0.296372
NCAN KO	36	0.239466
NCAN KO	37	0.245532
NCAN KO	38	0.235384
NCAN KO	39	0.25361
NCAN KO	40	0.267032
NCAN KO	41	0.285794
NCAN KO	42	0.320194
NCAN KO	43	0.310363
NCAN KO	44	0.296939
NCAN KO	45	0.30635
NCAN KO	46	0.291953
NCAN KO	47	0.285676
NCAN KO	48	0.29801
NCAN KO	49	0.301092
NCAN KO	50	0.29565
NCAN KO	51	0.283109
NCAN KO	52	0.271742
NCAN KO	53	0.281977
NCAN KO	54	0.284223
NCAN KO	55	0.314715
NCAN KO	56	0.300469
NCAN KO	57	0.247035
NCAN KO	58	0.285947
NCAN KO	59	0.272023
NCAN KO	60	0.283163
NCAN KO	61	0.265891
NCAN KO	62	0.250518
NCAN KO	63	0.26403
NCAN KO	64	0.255996
NCAN KO	65	0.275307
NCAN KO	66	0.280199
NCAN KO	67	0.272146
NCAN KO	68	0.262149
NCAN KO	69	0.284896
NCAN KO	70	0.257227
NCAN KO	71	0.28177
NCAN KO	72	0.266754
NCAN KO	73	0.239987
NCAN KO	74	0.24781
NCAN KO	75	0.252299
NCAN KO	76	0.261545
NCAN KO	77	0.280708
NCAN KO	78	0.290478
NCAN KO	79	0.268228
NCAN KO	80	0.285738
NCAN KO	81	0.295473
NCAN KO	82	0.315454
NCAN KO	83	0.352605
NCAN KO	84	0.402894
NCAN KO	85	0.438492
NCAN KO	86	0.430533
NCAN KO	87	0.483547
NCAN KO	88	0.483249
NCAN KO	89	0.43853
NCAN KO	90	0.493452
NCAN KO	91	0.461372
NCAN KO	92	0.491697
NCAN KO	93	0.509631
NCAN KO	94	0.512234
NCAN KO	95	0.505052
NCAN KO	96	0.503272
NCAN KO	97	0.525267
NCAN KO	98	0.580374
NCAN KO	99	0.565095
NCAN KO	100	0.610621
NCAN KO	1	0.329598
NCAN KO	2	0.316904
NCAN KO	3	0.346226
NCAN KO	4	0.343242
NCAN KO	5	0.326012
NCAN KO	6	0.31317
NCAN KO	7	0.306134
NCAN KO	8	0.317881
NCAN KO	9	0.308036
NCAN KO	10	0.315239
NCAN KO	11	0.312679
NCAN KO	12	0.315407
NCAN KO	13	0.304207
NCAN KO	14	0.289059
NCAN KO	15	0.290553
NCAN KO	16	0.294894
NCAN KO	17	0.301016
NCAN KO	18	0.298928
NCAN KO	19	0.301532
NCAN KO	20	0.311806
NCAN KO	21	0.319084
NCAN KO	22	0.351954
NCAN KO	23	0.386477
NCAN KO	24	0.409799
NCAN KO	25	0.453744
NCAN KO	26	0.493526
NCAN KO	27	0.498467
NCAN KO	28	0.485017
NCAN KO	29	0.455895
NCAN KO	30	0.415194
NCAN KO	31	0.388805
NCAN KO	32	0.362638
NCAN KO	33	0.408579
NCAN KO	34	0.4513
NCAN KO	35	0.399994
NCAN KO	36	0.363448
NCAN KO	37	0.396182
NCAN KO	38	0.387256
NCAN KO	39	0.38334
NCAN KO	40	0.420096
NCAN KO	41	0.400077
NCAN KO	42	0.401774
NCAN KO	43	0.369176
NCAN KO	44	0.334935
NCAN KO	45	0.362836
NCAN KO	46	0.380939
NCAN KO	47	0.34737
NCAN KO	48	0.332679
NCAN KO	49	0.351793
NCAN KO	50	0.333203
NCAN KO	51	0.309416
NCAN KO	52	0.311789
NCAN KO	53	0.326908
NCAN KO	54	0.305215
NCAN KO	55	0.295924
NCAN KO	56	0.288778
NCAN KO	57	0.298447
NCAN KO	58	0.284693
NCAN KO	59	0.279421
NCAN KO	60	0.29915
NCAN KO	61	0.284204
NCAN KO	62	0.309948
NCAN KO	63	0.267801
NCAN KO	64	0.256631
NCAN KO	65	0.253361
NCAN KO	66	0.266411
NCAN KO	67	0.242699
NCAN KO	68	0.235403
NCAN KO	69	0.246645
NCAN KO	70	0.2407
NCAN KO	71	0.22464
NCAN KO	72	0.236518
NCAN KO	73	0.223841
NCAN KO	74	0.230423
NCAN KO	75	0.219015
NCAN KO	76	0.217692
NCAN KO	77	0.230231
NCAN KO	78	0.21773
NCAN KO	79	0.229554
NCAN KO	80	0.231766
NCAN KO	81	0.264236
NCAN KO	82	0.256356
NCAN KO	83	0.29958
NCAN KO	84	0.327625
NCAN KO	85	0.341719
NCAN KO	86	0.380558
NCAN KO	87	0.404924
NCAN KO	88	0.361263
NCAN KO	89	0.416227
NCAN KO	90	0.451614
NCAN KO	91	0.471034
NCAN KO	92	0.442842
NCAN KO	93	0.445515
NCAN KO	94	0.501907
NCAN KO	95	0.468806
NCAN KO	96	0.470608
NCAN KO	97	0.479786
NCAN KO	98	0.526467
NCAN KO	99	0.567496
NCAN KO	100	0.607621
NCAN KO	1	0.462321
NCAN KO	2	0.554675
NCAN KO	3	0.60895
NCAN KO	4	0.508685
NCAN KO	5	0.438911
NCAN KO	6	0.443111
NCAN KO	7	0.437619
NCAN KO	8	0.381016
NCAN KO	9	0.369071
NCAN KO	10	0.364043
NCAN KO	11	0.384744
NCAN KO	12	0.392766
NCAN KO	13	0.34571
NCAN KO	14	0.357462
NCAN KO	15	0.387087
NCAN KO	16	0.354591
NCAN KO	17	0.400663
NCAN KO	18	0.39693
NCAN KO	19	0.406298
NCAN KO	20	0.438488
NCAN KO	21	0.549543
NCAN KO	22	0.625596
NCAN KO	23	0.692238
NCAN KO	24	0.695068
NCAN KO	25	0.562424
NCAN KO	26	0.627312
NCAN KO	27	0.635005
NCAN KO	28	0.661976
NCAN KO	29	0.629788
NCAN KO	30	0.549003
NCAN KO	31	0.595342
NCAN KO	32	0.512532
NCAN KO	33	0.463359
NCAN KO	34	0.507041
NCAN KO	35	0.538464
NCAN KO	36	0.478832
NCAN KO	37	0.444398
NCAN KO	38	0.435096
NCAN KO	39	0.45485
NCAN KO	40	0.411303
NCAN KO	41	0.410535
NCAN KO	42	0.346783
NCAN KO	43	0.373176
NCAN KO	44	0.35905
NCAN KO	45	0.347756
NCAN KO	46	0.386429
NCAN KO	47	0.347424
NCAN KO	48	0.373836
NCAN KO	49	0.328076
NCAN KO	50	0.369759
NCAN KO	51	0.391591
NCAN KO	52	0.371304
NCAN KO	53	0.373823
NCAN KO	54	0.321748
NCAN KO	55	0.341664
NCAN KO	56	0.339307
NCAN KO	57	0.339055
NCAN KO	58	0.308812
NCAN KO	59	0.312805
NCAN KO	60	0.323656
NCAN KO	61	0.33679
NCAN KO	62	0.326988
NCAN KO	63	0.317666
NCAN KO	64	0.315714
NCAN KO	65	0.300166
NCAN KO	66	0.304983
NCAN KO	67	0.300932
NCAN KO	68	0.335923
NCAN KO	69	0.313681
NCAN KO	70	0.287648
NCAN KO	71	0.300584
NCAN KO	72	0.297692
NCAN KO	73	0.274395
NCAN KO	74	0.300221
NCAN KO	75	0.257742
NCAN KO	76	0.315216
NCAN KO	77	0.304057
NCAN KO	78	0.305485
NCAN KO	79	0.281315
NCAN KO	80	0.316078
NCAN KO	81	0.290544
NCAN KO	82	0.332508
NCAN KO	83	0.354547
NCAN KO	84	0.36108
NCAN KO	85	0.3929
NCAN KO	86	0.462667
NCAN KO	87	0.460908
NCAN KO	88	0.547779
NCAN KO	89	0.517456
NCAN KO	90	0.509176
NCAN KO	91	0.52804
NCAN KO	92	0.494742
NCAN KO	93	0.587776
NCAN KO	94	0.555124
NCAN KO	95	0.550753
NCAN KO	96	0.539636
NCAN KO	97	0.599856
NCAN KO	98	0.667058
NCAN KO	99	0.639065
NCAN KO	100	0.607865
NCAN KO	1	0.618901
NCAN KO	2	0.573289
NCAN KO	3	0.592951
NCAN KO	4	0.576212
NCAN KO	5	0.514926
NCAN KO	6	0.531302
NCAN KO	7	0.504502
NCAN KO	8	0.509249
NCAN KO	9	0.519484
NCAN KO	10	0.515786
NCAN KO	11	0.457044
NCAN KO	12	0.488447
NCAN KO	13	0.501769
NCAN KO	14	0.464833
NCAN KO	15	0.512163
NCAN KO	16	0.471218
NCAN KO	17	0.46239
NCAN KO	18	0.471586
NCAN KO	19	0.521856
NCAN KO	20	0.478738
NCAN KO	21	0.569753
NCAN KO	22	0.770442
NCAN KO	23	0.719698
NCAN KO	24	0.688328
NCAN KO	25	0.773293
NCAN KO	26	0.720749
NCAN KO	27	0.725931
NCAN KO	28	0.906379
NCAN KO	29	0.852553
NCAN KO	30	0.90718
NCAN KO	31	0.87158
NCAN KO	32	1.04341
NCAN KO	33	0.837206
NCAN KO	34	0.818386
NCAN KO	35	0.755636
NCAN KO	36	0.81389
NCAN KO	37	0.810837
NCAN KO	38	0.974563
NCAN KO	39	0.903667
NCAN KO	40	0.778881
NCAN KO	41	0.711583
NCAN KO	42	0.631421
NCAN KO	43	0.612584
NCAN KO	44	0.62564
NCAN KO	45	0.608698
NCAN KO	46	0.556647
NCAN KO	47	0.586985
NCAN KO	48	0.54717
NCAN KO	49	0.547151
NCAN KO	50	0.528453
NCAN KO	51	0.520157
NCAN KO	52	0.466339
NCAN KO	53	0.545265
NCAN KO	54	0.528366
NCAN KO	55	0.507845
NCAN KO	56	0.515277
NCAN KO	57	0.514522
NCAN KO	58	0.466124
NCAN KO	59	0.47784
NCAN KO	60	0.517257
NCAN KO	61	0.495826
NCAN KO	62	0.480297
NCAN KO	63	0.448873
NCAN KO	64	0.429942
NCAN KO	65	0.405871
NCAN KO	66	0.462164
NCAN KO	67	0.460555
NCAN KO	68	0.432005
NCAN KO	69	0.428561
NCAN KO	70	0.450077
NCAN KO	71	0.441379
NCAN KO	72	0.446897
NCAN KO	73	0.438901
NCAN KO	74	0.391505
NCAN KO	75	0.399443
NCAN KO	76	0.44714
NCAN KO	77	0.481866
NCAN KO	78	0.449269
NCAN KO	79	0.413928
NCAN KO	80	0.40285
NCAN KO	81	0.46365
NCAN KO	82	0.46212
NCAN KO	83	0.493998
NCAN KO	84	0.482933
NCAN KO	85	0.473518
NCAN KO	86	0.586386
NCAN KO	87	0.661765
NCAN KO	88	0.672366
NCAN KO	89	0.733338
NCAN KO	90	0.659337
NCAN KO	91	0.78151
NCAN KO	92	0.788275
NCAN KO	93	0.765983
NCAN KO	94	0.79029
NCAN KO	95	0.824776
NCAN KO	96	0.802444
NCAN KO	97	0.813011
NCAN KO	98	0.810816
NCAN KO	99	0.792932
NCAN KO	100	0.941527
NCAN KO	1	0.55194
NCAN KO	2	0.540118
NCAN KO	3	0.542436
NCAN KO	4	0.494231
NCAN KO	5	0.498819
NCAN KO	6	0.500281
NCAN KO	7	0.498428
NCAN KO	8	0.47898
NCAN KO	9	0.421436
NCAN KO	10	0.417884
NCAN KO	11	0.449012
NCAN KO	12	0.471024
NCAN KO	13	0.440887
NCAN KO	14	0.423618
NCAN KO	15	0.416873
NCAN KO	16	0.404392
NCAN KO	17	0.428071
NCAN KO	18	0.45548
NCAN KO	19	0.503353
NCAN KO	20	0.526351
NCAN KO	21	0.603089
NCAN KO	22	0.62719
NCAN KO	23	0.660383
NCAN KO	24	0.789437
NCAN KO	25	0.798264
NCAN KO	26	0.777787
NCAN KO	27	0.951538
NCAN KO	28	0.979706
NCAN KO	29	0.929384
NCAN KO	30	0.880331
NCAN KO	31	0.843823
NCAN KO	32	0.802851
NCAN KO	33	0.914594
NCAN KO	34	0.851152
NCAN KO	35	0.899289
NCAN KO	36	0.803456
NCAN KO	37	0.805754
NCAN KO	38	0.825724
NCAN KO	39	0.771982
NCAN KO	40	0.803119
NCAN KO	41	0.761861
NCAN KO	42	0.846086
NCAN KO	43	0.737438
NCAN KO	44	0.64525
NCAN KO	45	0.60704
NCAN KO	46	0.55131
NCAN KO	47	0.458867
NCAN KO	48	0.418917
NCAN KO	49	0.479273
NCAN KO	50	0.505048
NCAN KO	51	0.43452
NCAN KO	52	0.464862
NCAN KO	53	0.417327
NCAN KO	54	0.415441
NCAN KO	55	0.433707
NCAN KO	56	0.405611
NCAN KO	57	0.37558
NCAN KO	58	0.347831
NCAN KO	59	0.348546
NCAN KO	60	0.360515
NCAN KO	61	0.356694
NCAN KO	62	0.346531
NCAN KO	63	0.334455
NCAN KO	64	0.355504
NCAN KO	65	0.313908
NCAN KO	66	0.348669
NCAN KO	67	0.361062
NCAN KO	68	0.352442
NCAN KO	69	0.345356
NCAN KO	70	0.357249
NCAN KO	71	0.320282
NCAN KO	72	0.321995
NCAN KO	73	0.355593
NCAN KO	74	0.356702
NCAN KO	75	0.314564
NCAN KO	76	0.339266
NCAN KO	77	0.366032
NCAN KO	78	0.328986
NCAN KO	79	0.317042
NCAN KO	80	0.303978
NCAN KO	81	0.350692
NCAN KO	82	0.371666
NCAN KO	83	0.367508
NCAN KO	84	0.414471
NCAN KO	85	0.411966
NCAN KO	86	0.445642
NCAN KO	87	0.462274
NCAN KO	88	0.477361
NCAN KO	89	0.533111
NCAN KO	90	0.510873
NCAN KO	91	0.554214
NCAN KO	92	0.579097
NCAN KO	93	0.57821
NCAN KO	94	0.576447
NCAN KO	95	0.631354
NCAN KO	96	0.66688
NCAN KO	97	0.698811
NCAN KO	98	0.642972
NCAN KO	99	0.66736
NCAN KO	100	0.72116
NCAN KO	1	0.590863
NCAN KO	2	0.629862
NCAN KO	3	0.655144
NCAN KO	4	0.612821
NCAN KO	5	0.619643
NCAN KO	6	0.7101
NCAN KO	7	0.696083
NCAN KO	8	0.57053
NCAN KO	9	0.490763
NCAN KO	10	0.486992
NCAN KO	11	0.470844
NCAN KO	12	0.491393
NCAN KO	13	0.508381
NCAN KO	14	0.491693
NCAN KO	15	0.529789
NCAN KO	16	0.543494
NCAN KO	17	0.658473
NCAN KO	18	0.581895
NCAN KO	19	0.603295
NCAN KO	20	0.641378
NCAN KO	21	0.750529
NCAN KO	22	0.968846
NCAN KO	23	1.09633
NCAN KO	24	1.06392
NCAN KO	25	1.00264
NCAN KO	26	1.02659
NCAN KO	27	0.909236
NCAN KO	28	1.2419
NCAN KO	29	1.32941
NCAN KO	30	1.1713
NCAN KO	31	0.956483
NCAN KO	32	0.88396
NCAN KO	33	0.953809
NCAN KO	34	0.93747
NCAN KO	35	0.996285
NCAN KO	36	1.01853
NCAN KO	37	0.827744
NCAN KO	38	0.810769
NCAN KO	39	0.606794
NCAN KO	40	0.682713
NCAN KO	41	0.729023
NCAN KO	42	0.747403
NCAN KO	43	0.68043
NCAN KO	44	0.558463
NCAN KO	45	0.432411
NCAN KO	46	0.467759
NCAN KO	47	0.508111
NCAN KO	48	0.461808
NCAN KO	49	0.437826
NCAN KO	50	0.472609
NCAN KO	51	0.410024
NCAN KO	52	0.44426
NCAN KO	53	0.441321
NCAN KO	54	0.417698
NCAN KO	55	0.448162
NCAN KO	56	0.481368
NCAN KO	57	0.387097
NCAN KO	58	0.393055
NCAN KO	59	0.369379
NCAN KO	60	0.404096
NCAN KO	61	0.387522
NCAN KO	62	0.398877
NCAN KO	63	0.346152
NCAN KO	64	0.387405
NCAN KO	65	0.343378
NCAN KO	66	0.377826
NCAN KO	67	0.399987
NCAN KO	68	0.383832
NCAN KO	69	0.384356
NCAN KO	70	0.375448
NCAN KO	71	0.389819
NCAN KO	72	0.405096
NCAN KO	73	0.347922
NCAN KO	74	0.389251
NCAN KO	75	0.360956
NCAN KO	76	0.386331
NCAN KO	77	0.323087
NCAN KO	78	0.388653
NCAN KO	79	0.345416
NCAN KO	80	0.317296
NCAN KO	81	0.355118
NCAN KO	82	0.36668
NCAN KO	83	0.388885
NCAN KO	84	0.43255
NCAN KO	85	0.41634
NCAN KO	86	0.477103
NCAN KO	87	0.476778
NCAN KO	88	0.542249
NCAN KO	89	0.529054
NCAN KO	90	0.500562
NCAN KO	91	0.554357
NCAN KO	92	0.509386
NCAN KO	93	0.512799
NCAN KO	94	0.575601
NCAN KO	95	0.653297
NCAN KO	96	0.671084
NCAN KO	97	0.668046
NCAN KO	98	0.70127
NCAN KO	99	0.692036
NCAN KO	100	0.651631
NCAN KO	1	0.730018
NCAN KO	2	0.848223
NCAN KO	3	0.790449
NCAN KO	4	0.755437
NCAN KO	5	0.831941
NCAN KO	6	0.791527
NCAN KO	7	0.878295
NCAN KO	8	0.728621
NCAN KO	9	0.825578
NCAN KO	10	0.819566
NCAN KO	11	0.780527
NCAN KO	12	0.82094
NCAN KO	13	0.780809
NCAN KO	14	0.811505
NCAN KO	15	0.728713
NCAN KO	16	0.74437
NCAN KO	17	0.791412
NCAN KO	18	0.817016
NCAN KO	19	0.824032
NCAN KO	20	1.00725
NCAN KO	21	1.18965
NCAN KO	22	1.23015
NCAN KO	23	1.50153
NCAN KO	24	1.97026
NCAN KO	25	1.67426
NCAN KO	26	1.55102
NCAN KO	27	1.66185
NCAN KO	28	1.5024
NCAN KO	29	1.47197
NCAN KO	30	1.37705
NCAN KO	31	1.37372
NCAN KO	32	1.38443
NCAN KO	33	1.14407
NCAN KO	34	0.904969
NCAN KO	35	0.822196
NCAN KO	36	0.74096
NCAN KO	37	0.810191
NCAN KO	38	0.974001
NCAN KO	39	0.965034
NCAN KO	40	0.975973
NCAN KO	41	0.894089
NCAN KO	42	1.05717
NCAN KO	43	1.02012
NCAN KO	44	0.953327
NCAN KO	45	0.903835
NCAN KO	46	0.79521
NCAN KO	47	0.776016
NCAN KO	48	0.793592
NCAN KO	49	0.68073
NCAN KO	50	0.681595
NCAN KO	51	0.645366
NCAN KO	52	0.695257
NCAN KO	53	0.706504
NCAN KO	54	0.610103
NCAN KO	55	0.579984
NCAN KO	56	0.514434
NCAN KO	57	0.592332
NCAN KO	58	0.515652
NCAN KO	59	0.491268
NCAN KO	60	0.447748
NCAN KO	61	0.428185
NCAN KO	62	0.431089
NCAN KO	63	0.468757
NCAN KO	64	0.498466
NCAN KO	65	0.437295
NCAN KO	66	0.417142
NCAN KO	67	0.406344
NCAN KO	68	0.424
NCAN KO	69	0.456645
NCAN KO	70	0.471487
NCAN KO	71	0.466662
NCAN KO	72	0.505942
NCAN KO	73	0.411226
NCAN KO	74	0.401257
NCAN KO	75	0.424023
NCAN KO	76	0.40428
NCAN KO	77	0.390938
NCAN KO	78	0.418289
NCAN KO	79	0.427636
NCAN KO	80	0.431483
NCAN KO	81	0.452405
NCAN KO	82	0.479692
NCAN KO	83	0.509404
NCAN KO	84	0.544724
NCAN KO	85	0.597129
NCAN KO	86	0.540576
NCAN KO	87	0.565914
NCAN KO	88	0.618765
NCAN KO	89	0.634652
NCAN KO	90	0.630381
NCAN KO	91	0.666825
NCAN KO	92	0.651004
NCAN KO	93	0.676092
NCAN KO	94	0.65551
NCAN KO	95	0.711694
NCAN KO	96	0.837158
NCAN KO	97	0.783019
NCAN KO	98	0.836479
NCAN KO	99	0.811713
NCAN KO	100	0.895689
TNC KO	1	0.288493
TNC KO	2	0.283733
TNC KO	3	0.284132
TNC KO	4	0.266131
TNC KO	5	0.277965
TNC KO	6	0.260395
TNC KO	7	0.261968
TNC KO	8	0.28883
TNC KO	9	0.255498
TNC KO	10	0.269918
TNC KO	11	0.243453
TNC KO	12	0.238498
TNC KO	13	0.258977
TNC KO	14	0.269795
TNC KO	15	0.267412
TNC KO	16	0.254723
TNC KO	17	0.280542
TNC KO	18	0.244446
TNC KO	19	0.303292
TNC KO	20	0.362065
TNC KO	21	0.42202
TNC KO	22	0.524063
TNC KO	23	0.527689
TNC KO	24	0.496511
TNC KO	25	0.528569
TNC KO	26	0.61019
TNC KO	27	0.580694
TNC KO	28	0.528044
TNC KO	29	0.603978
TNC KO	30	0.639125
TNC KO	31	0.567936
TNC KO	32	0.507265
TNC KO	33	0.457873
TNC KO	34	0.484868
TNC KO	35	0.672422
TNC KO	36	0.570121
TNC KO	37	0.489025
TNC KO	38	0.440422
TNC KO	39	0.476792
TNC KO	40	0.405189
TNC KO	41	0.351881
TNC KO	42	0.403092
TNC KO	43	0.370593
TNC KO	44	0.341878
TNC KO	45	0.288779
TNC KO	46	0.280835
TNC KO	47	0.288509
TNC KO	48	0.278776
TNC KO	49	0.269936
TNC KO	50	0.282264
TNC KO	51	0.279756
TNC KO	52	0.272605
TNC KO	53	0.254173
TNC KO	54	0.266585
TNC KO	55	0.264543
TNC KO	56	0.249831
TNC KO	57	0.248526
TNC KO	58	0.25096
TNC KO	59	0.261366
TNC KO	60	0.289911
TNC KO	61	0.249015
TNC KO	62	0.243719
TNC KO	63	0.251707
TNC KO	64	0.263622
TNC KO	65	0.233149
TNC KO	66	0.255618
TNC KO	67	0.254105
TNC KO	68	0.245478
TNC KO	69	0.251638
TNC KO	70	0.232211
TNC KO	71	0.219582
TNC KO	72	0.224146
TNC KO	73	0.236148
TNC KO	74	0.266627
TNC KO	75	0.241905
TNC KO	76	0.221207
TNC KO	77	0.221038
TNC KO	78	0.257707
TNC KO	79	0.298976
TNC KO	80	0.320525
TNC KO	81	0.322033
TNC KO	82	0.281973
TNC KO	83	0.286293
TNC KO	84	0.324691
TNC KO	85	0.328068
TNC KO	86	0.33742
TNC KO	87	0.350471
TNC KO	88	0.361462
TNC KO	89	0.380426
TNC KO	90	0.383737
TNC KO	91	0.455957
TNC KO	92	0.431347
TNC KO	93	0.418607
TNC KO	94	0.465047
TNC KO	95	0.463977
TNC KO	96	0.474453
TNC KO	97	0.528001
TNC KO	98	0.518875
TNC KO	99	0.510239
TNC KO	100	0.577087
TNC KO	1	0.356264
TNC KO	2	0.324585
TNC KO	3	0.293891
TNC KO	4	0.29291
TNC KO	5	0.317668
TNC KO	6	0.295543
TNC KO	7	0.311829
TNC KO	8	0.288869
TNC KO	9	0.27204
TNC KO	10	0.259259
TNC KO	11	0.253489
TNC KO	12	0.252455
TNC KO	13	0.258483
TNC KO	14	0.261645
TNC KO	15	0.273554
TNC KO	16	0.284248
TNC KO	17	0.285348
TNC KO	18	0.284443
TNC KO	19	0.388438
TNC KO	20	0.785372
TNC KO	21	0.907731
TNC KO	22	1.03505
TNC KO	23	0.928261
TNC KO	24	0.758723
TNC KO	25	0.964032
TNC KO	26	0.951206
TNC KO	27	0.900443
TNC KO	28	0.825944
TNC KO	29	0.737832
TNC KO	30	0.683486
TNC KO	31	0.817799
TNC KO	32	0.97961
TNC KO	33	0.854352
TNC KO	34	0.780947
TNC KO	35	0.573463
TNC KO	36	0.49216
TNC KO	37	0.649573
TNC KO	38	0.755376
TNC KO	39	0.64855
TNC KO	40	0.464654
TNC KO	41	0.393719
TNC KO	42	0.490588
TNC KO	43	0.519211
TNC KO	44	0.372775
TNC KO	45	0.366104
TNC KO	46	0.410563
TNC KO	47	0.35903
TNC KO	48	0.355466
TNC KO	49	0.341041
TNC KO	50	0.351052
TNC KO	51	0.358722
TNC KO	52	0.362503
TNC KO	53	0.362449
TNC KO	54	0.367497
TNC KO	55	0.348738
TNC KO	56	0.337482
TNC KO	57	0.294164
TNC KO	58	0.28528
TNC KO	59	0.296324
TNC KO	60	0.291812
TNC KO	61	0.29237
TNC KO	62	0.257341
TNC KO	63	0.217112
TNC KO	64	0.253693
TNC KO	65	0.250874
TNC KO	66	0.25549
TNC KO	67	0.241139
TNC KO	68	0.230936
TNC KO	69	0.210768
TNC KO	70	0.213716
TNC KO	71	0.204802
TNC KO	72	0.19317
TNC KO	73	0.200979
TNC KO	74	0.186812
TNC KO	75	0.193142
TNC KO	76	0.1801
TNC KO	77	0.180055
TNC KO	78	0.194271
TNC KO	79	0.193616
TNC KO	80	0.219729
TNC KO	81	0.195502
TNC KO	82	0.187845
TNC KO	83	0.204686
TNC KO	84	0.245382
TNC KO	85	0.247774
TNC KO	86	0.255786
TNC KO	87	0.277767
TNC KO	88	0.263086
TNC KO	89	0.260977
TNC KO	90	0.254712
TNC KO	91	0.27761
TNC KO	92	0.273284
TNC KO	93	0.257634
TNC KO	94	0.284808
TNC KO	95	0.293402
TNC KO	96	0.291584
TNC KO	97	0.327538
TNC KO	98	0.329894
TNC KO	99	0.361132
TNC KO	100	0.343167
TNC KO	1	0.396059
TNC KO	2	0.391126
TNC KO	3	0.346703
TNC KO	4	0.351753
TNC KO	5	0.361332
TNC KO	6	0.350886
TNC KO	7	0.336385
TNC KO	8	0.290538
TNC KO	9	0.308966
TNC KO	10	0.314482
TNC KO	11	0.345694
TNC KO	12	0.358495
TNC KO	13	0.330293
TNC KO	14	0.336574
TNC KO	15	0.336138
TNC KO	16	0.327687
TNC KO	17	0.304534
TNC KO	18	0.334674
TNC KO	19	0.327525
TNC KO	20	0.330295
TNC KO	21	0.33884
TNC KO	22	0.344945
TNC KO	23	0.387486
TNC KO	24	0.597263
TNC KO	25	0.666339
TNC KO	26	0.669591
TNC KO	27	0.656437
TNC KO	28	0.690304
TNC KO	29	0.949112
TNC KO	30	1.03117
TNC KO	31	1.15953
TNC KO	32	1.02618
TNC KO	33	0.942309
TNC KO	34	0.727198
TNC KO	35	0.774131
TNC KO	36	0.851253
TNC KO	37	0.869075
TNC KO	38	0.908803
TNC KO	39	0.872825
TNC KO	40	0.872758
TNC KO	41	0.920108
TNC KO	42	0.802653
TNC KO	43	0.626686
TNC KO	44	0.685436
TNC KO	45	0.74181
TNC KO	46	0.607393
TNC KO	47	0.548806
TNC KO	48	0.501104
TNC KO	49	0.48339
TNC KO	50	0.500059
TNC KO	51	0.440695
TNC KO	52	0.388226
TNC KO	53	0.438267
TNC KO	54	0.372246
TNC KO	55	0.391941
TNC KO	56	0.328209
TNC KO	57	0.305895
TNC KO	58	0.337753
TNC KO	59	0.312215
TNC KO	60	0.298299
TNC KO	61	0.280461
TNC KO	62	0.254198
TNC KO	63	0.257721
TNC KO	64	0.267016
TNC KO	65	0.258013
TNC KO	66	0.237374
TNC KO	67	0.247608
TNC KO	68	0.255754
TNC KO	69	0.251595
TNC KO	70	0.253767
TNC KO	71	0.237111
TNC KO	72	0.243147
TNC KO	73	0.223612
TNC KO	74	0.214635
TNC KO	75	0.246133
TNC KO	76	0.239839
TNC KO	77	0.243473
TNC KO	78	0.247112
TNC KO	79	0.244177
TNC KO	80	0.253933
TNC KO	81	0.258063
TNC KO	82	0.240482
TNC KO	83	0.256734
TNC KO	84	0.27012
TNC KO	85	0.29793
TNC KO	86	0.310899
TNC KO	87	0.318415
TNC KO	88	0.312134
TNC KO	89	0.346526
TNC KO	90	0.340077
TNC KO	91	0.387325
TNC KO	92	0.370687
TNC KO	93	0.447225
TNC KO	94	0.429723
TNC KO	95	0.439259
TNC KO	96	0.44016
TNC KO	97	0.441233
TNC KO	98	0.455656
TNC KO	99	0.482706
TNC KO	100	0.497456
TNC KO	1	0.354468
TNC KO	2	0.345549
TNC KO	3	0.358089
TNC KO	4	0.330332
TNC KO	5	0.300744
TNC KO	6	0.272136
TNC KO	7	0.272964
TNC KO	8	0.263578
TNC KO	9	0.239951
TNC KO	10	0.230209
TNC KO	11	0.235607
TNC KO	12	0.250831
TNC KO	13	0.253993
TNC KO	14	0.25049
TNC KO	15	0.22327
TNC KO	16	0.239666
TNC KO	17	0.277708
TNC KO	18	0.2691
TNC KO	19	0.221126
TNC KO	20	0.245661
TNC KO	21	0.24796
TNC KO	22	0.268449
TNC KO	23	0.262117
TNC KO	24	0.322592
TNC KO	25	0.444316
TNC KO	26	0.766426
TNC KO	27	1.06719
TNC KO	28	0.980721
TNC KO	29	0.891656
TNC KO	30	0.78428
TNC KO	31	0.878475
TNC KO	32	0.888494
TNC KO	33	0.793759
TNC KO	34	0.825216
TNC KO	35	0.646374
TNC KO	36	0.706173
TNC KO	37	0.774517
TNC KO	38	0.705368
TNC KO	39	0.876602
TNC KO	40	0.884601
TNC KO	41	0.742332
TNC KO	42	0.830172
TNC KO	43	0.726404
TNC KO	44	0.647866
TNC KO	45	0.597301
TNC KO	46	0.440917
TNC KO	47	0.385294
TNC KO	48	0.378251
TNC KO	49	0.389082
TNC KO	50	0.383213
TNC KO	51	0.3441
TNC KO	52	0.361088
TNC KO	53	0.325999
TNC KO	54	0.311999
TNC KO	55	0.316676
TNC KO	56	0.309921
TNC KO	57	0.296469
TNC KO	58	0.257374
TNC KO	59	0.295559
TNC KO	60	0.253114
TNC KO	61	0.241388
TNC KO	62	0.259806
TNC KO	63	0.243128
TNC KO	64	0.252577
TNC KO	65	0.240485
TNC KO	66	0.238682
TNC KO	67	0.224083
TNC KO	68	0.22194
TNC KO	69	0.216963
TNC KO	70	0.230703
TNC KO	71	0.22826
TNC KO	72	0.231895
TNC KO	73	0.235326
TNC KO	74	0.223457
TNC KO	75	0.221263
TNC KO	76	0.238893
TNC KO	77	0.21875
TNC KO	78	0.225058
TNC KO	79	0.229788
TNC KO	80	0.228585
TNC KO	81	0.241419
TNC KO	82	0.264483
TNC KO	83	0.268575
TNC KO	84	0.293855
TNC KO	85	0.301488
TNC KO	86	0.327694
TNC KO	87	0.343507
TNC KO	88	0.356946
TNC KO	89	0.31171
TNC KO	90	0.360806
TNC KO	91	0.387083
TNC KO	92	0.38311
TNC KO	93	0.373367
TNC KO	94	0.390075
TNC KO	95	0.428009
TNC KO	96	0.411097
TNC KO	97	0.428873
TNC KO	98	0.417146
TNC KO	99	0.41234
TNC KO	100	0.457419
TNC KO	1	0.352497
TNC KO	2	0.333001
TNC KO	3	0.362293
TNC KO	4	0.316806
TNC KO	5	0.332976
TNC KO	6	0.354241
TNC KO	7	0.3381
TNC KO	8	0.337588
TNC KO	9	0.399983
TNC KO	10	0.407385
TNC KO	11	0.382505
TNC KO	12	0.369057
TNC KO	13	0.381181
TNC KO	14	0.332259
TNC KO	15	0.335469
TNC KO	16	0.353417
TNC KO	17	0.359256
TNC KO	18	0.403896
TNC KO	19	0.393572
TNC KO	20	0.361994
TNC KO	21	0.34244
TNC KO	22	0.362125
TNC KO	23	0.395905
TNC KO	24	0.404622
TNC KO	25	0.546654
TNC KO	26	0.629164
TNC KO	27	0.858085
TNC KO	28	0.961914
TNC KO	29	0.8799
TNC KO	30	0.842505
TNC KO	31	0.760261
TNC KO	32	0.856198
TNC KO	33	0.886755
TNC KO	34	0.833378
TNC KO	35	0.67577
TNC KO	36	0.821499
TNC KO	37	0.800971
TNC KO	38	0.938586
TNC KO	39	1.04296
TNC KO	40	0.924569
TNC KO	41	0.948889
TNC KO	42	0.969373
TNC KO	43	0.843687
TNC KO	44	0.716406
TNC KO	45	0.652292
TNC KO	46	0.676069
TNC KO	47	0.629163
TNC KO	48	0.534744
TNC KO	49	0.485444
TNC KO	50	0.464646
TNC KO	51	0.450417
TNC KO	52	0.415232
TNC KO	53	0.35267
TNC KO	54	0.364553
TNC KO	55	0.410988
TNC KO	56	0.362654
TNC KO	57	0.370406
TNC KO	58	0.364239
TNC KO	59	0.36
TNC KO	60	0.35031
TNC KO	61	0.322422
TNC KO	62	0.34358
TNC KO	63	0.336332
TNC KO	64	0.300795
TNC KO	65	0.300318
TNC KO	66	0.312634
TNC KO	67	0.296659
TNC KO	68	0.307264
TNC KO	69	0.284291
TNC KO	70	0.268458
TNC KO	71	0.2994
TNC KO	72	0.285616
TNC KO	73	0.261086
TNC KO	74	0.245892
TNC KO	75	0.233046
TNC KO	76	0.236352
TNC KO	77	0.235933
TNC KO	78	0.221116
TNC KO	79	0.236411
TNC KO	80	0.252958
TNC KO	81	0.265146
TNC KO	82	0.25016
TNC KO	83	0.274094
TNC KO	84	0.278521
TNC KO	85	0.301245
TNC KO	86	0.327082
TNC KO	87	0.289295
TNC KO	88	0.31322
TNC KO	89	0.333951
TNC KO	90	0.354532
TNC KO	91	0.356491
TNC KO	92	0.364993
TNC KO	93	0.359494
TNC KO	94	0.387741
TNC KO	95	0.404576
TNC KO	96	0.447961
TNC KO	97	0.408356
TNC KO	98	0.420316
TNC KO	99	0.413573
TNC KO	100	0.43724
TNC KO	1	0.31139
TNC KO	2	0.2884
TNC KO	3	0.295349
TNC KO	4	0.295038
TNC KO	5	0.299268
TNC KO	6	0.341506
TNC KO	7	0.352917
TNC KO	8	0.316476
TNC KO	9	0.306904
TNC KO	10	0.265836
TNC KO	11	0.258389
TNC KO	12	0.260976
TNC KO	13	0.265235
TNC KO	14	0.262052
TNC KO	15	0.250704
TNC KO	16	0.246794
TNC KO	17	0.254417
TNC KO	18	0.262464
TNC KO	19	0.260151
TNC KO	20	0.270429
TNC KO	21	0.290516
TNC KO	22	0.303977
TNC KO	23	0.306328
TNC KO	24	0.322412
TNC KO	25	0.450443
TNC KO	26	0.460597
TNC KO	27	0.431463
TNC KO	28	0.398263
TNC KO	29	0.400059
TNC KO	30	0.474999
TNC KO	31	0.485501
TNC KO	32	0.444982
TNC KO	33	0.430415
TNC KO	34	0.40893
TNC KO	35	0.439852
TNC KO	36	0.453688
TNC KO	37	0.44279
TNC KO	38	0.42353
TNC KO	39	0.466267
TNC KO	40	0.365806
TNC KO	41	0.359086
TNC KO	42	0.42963
TNC KO	43	0.435592
TNC KO	44	0.369987
TNC KO	45	0.358193
TNC KO	46	0.338326
TNC KO	47	0.326122
TNC KO	48	0.290355
TNC KO	49	0.325203
TNC KO	50	0.297648
TNC KO	51	0.304883
TNC KO	52	0.296281
TNC KO	53	0.247575
TNC KO	54	0.28701
TNC KO	55	0.252528
TNC KO	56	0.265857
TNC KO	57	0.26903
TNC KO	58	0.285195
TNC KO	59	0.282004
TNC KO	60	0.268602
TNC KO	61	0.258242
TNC KO	62	0.244658
TNC KO	63	0.239182
TNC KO	64	0.240266
TNC KO	65	0.245114
TNC KO	66	0.234173
TNC KO	67	0.229494
TNC KO	68	0.240188
TNC KO	69	0.248914
TNC KO	70	0.227773
TNC KO	71	0.193182
TNC KO	72	0.207191
TNC KO	73	0.212331
TNC KO	74	0.215863
TNC KO	75	0.223958
TNC KO	76	0.207446
TNC KO	77	0.210611
TNC KO	78	0.214431
TNC KO	79	0.254301
TNC KO	80	0.22911
TNC KO	81	0.239551
TNC KO	82	0.217219
TNC KO	83	0.22592
TNC KO	84	0.233944
TNC KO	85	0.265001
TNC KO	86	0.297982
TNC KO	87	0.333464
TNC KO	88	0.350866
TNC KO	89	0.36233
TNC KO	90	0.361992
TNC KO	91	0.365908
TNC KO	92	0.375748
TNC KO	93	0.399497
TNC KO	94	0.411344
TNC KO	95	0.442407
TNC KO	96	0.465772
TNC KO	97	0.479604
TNC KO	98	0.50078
TNC KO	99	0.517075
[truncated: 301 more rows]
