# Supplementary material for: Assembly of neuron- and radial glial-cell-derived extracellular matrix molecules promotes radial migration of developing cortical neurons
Source: eLife journal article supplement (doi:10.7554/elife.92342), 2023-11-09
Supplement: fig8-data1 [file Numerical source data for Figure 8.xlsx]

## Sheet: Fig8 a
HA					NCAN					TNC
Type	X	Intensity			Type	X	Intensity			Type	X	Intensity
PBS	1	0.467951			PBS	1	0.0324591			PBS	1	0.171353
PBS	2	0.438051			PBS	2	0.0281911			PBS	2	0.100354
PBS	3	0.425149			PBS	3	0.0296428			PBS	3	0.0876481
PBS	4	0.414127			PBS	4	0.0317239			PBS	4	0.0799814
PBS	5	0.399127			PBS	5	0.0346414			PBS	5	0.0795382
PBS	6	0.386198			PBS	6	0.0343995			PBS	6	0.0785851
PBS	7	0.380158			PBS	7	0.0352123			PBS	7	0.0700497
PBS	8	0.364319			PBS	8	0.0361589			PBS	8	0.0686748
PBS	9	0.371873			PBS	9	0.0360157			PBS	9	0.0694193
PBS	10	0.370167			PBS	10	0.0367889			PBS	10	0.0734099
PBS	11	0.375697			PBS	11	0.036593			PBS	11	0.0764953
PBS	12	0.396764			PBS	12	0.0372112			PBS	12	0.0680362
PBS	13	0.430542			PBS	13	0.039835			PBS	13	0.0715091
PBS	14	0.418571			PBS	14	0.0399568			PBS	14	0.0728274
PBS	15	0.417038			PBS	15	0.0386541			PBS	15	0.0605184
PBS	16	0.434675			PBS	16	0.0390925			PBS	16	0.0634082
PBS	17	0.451984			PBS	17	0.038904			PBS	17	0.0621798
PBS	18	0.449584			PBS	18	0.0354315			PBS	18	0.0637859
PBS	19	0.45598			PBS	19	0.0382868			PBS	19	0.064317
PBS	20	0.48161			PBS	20	0.0415305			PBS	20	0.0754459
PBS	21	0.532724			PBS	21	0.0637211			PBS	21	0.117154
PBS	22	0.586857			PBS	22	0.114202			PBS	22	0.197149
PBS	23	0.890673			PBS	23	0.179437			PBS	23	0.272488
PBS	24	1.0448			PBS	24	0.276789			PBS	24	0.314489
PBS	25	1.08369			PBS	25	0.299354			PBS	25	0.298233
PBS	26	1.16583			PBS	26	0.348118			PBS	26	0.294192
PBS	27	1.25173			PBS	27	0.487145			PBS	27	0.391916
PBS	28	1.33743			PBS	28	0.600491			PBS	28	0.405158
PBS	29	1.25934			PBS	29	0.813572			PBS	29	0.512365
PBS	30	1.18998			PBS	30	0.691766			PBS	30	0.469049
PBS	31	1.09599			PBS	31	0.731854			PBS	31	0.604982
PBS	32	1.19191			PBS	32	0.706132			PBS	32	0.523373
PBS	33	1.04587			PBS	33	1.07618			PBS	33	0.632781
PBS	34	1.01724			PBS	34	1.00683			PBS	34	0.696282
PBS	35	0.92352			PBS	35	1.26834			PBS	35	0.843089
PBS	36	0.989862			PBS	36	1.15664			PBS	36	0.802521
PBS	37	0.929277			PBS	37	1.05225			PBS	37	0.814429
PBS	38	0.924698			PBS	38	1.03439			PBS	38	0.890499
PBS	39	1.10084			PBS	39	1.00022			PBS	39	0.831635
PBS	40	1.11579			PBS	40	0.970566			PBS	40	0.90628
PBS	41	1.24138			PBS	41	1.08043			PBS	41	1.04622
PBS	42	1.27069			PBS	42	1.1538			PBS	42	1.0393
PBS	43	1.21217			PBS	43	1.07136			PBS	43	0.911059
PBS	44	1.36277			PBS	44	0.833812			PBS	44	0.725257
PBS	45	1.09122			PBS	45	0.697324			PBS	45	0.627095
PBS	46	1.0235			PBS	46	0.603803			PBS	46	0.589334
PBS	47	0.948913			PBS	47	0.584009			PBS	47	0.514127
PBS	48	0.815727			PBS	48	0.484051			PBS	48	0.408294
PBS	49	0.835144			PBS	49	0.438568			PBS	49	0.445238
PBS	50	0.74017			PBS	50	0.391068			PBS	50	0.398265
PBS	51	0.778455			PBS	51	0.249533			PBS	51	0.366064
PBS	52	0.754513			PBS	52	0.214172			PBS	52	0.355414
PBS	53	0.694942			PBS	53	0.242063			PBS	53	0.350991
PBS	54	0.676967			PBS	54	0.211762			PBS	54	0.38483
PBS	55	0.598823			PBS	55	0.165627			PBS	55	0.323782
PBS	56	0.607122			PBS	56	0.128647			PBS	56	0.314597
PBS	57	0.581665			PBS	57	0.124751			PBS	57	0.276007
PBS	58	0.577623			PBS	58	0.130066			PBS	58	0.268801
PBS	59	0.548773			PBS	59	0.101393			PBS	59	0.234606
PBS	60	0.532751			PBS	60	0.0930628			PBS	60	0.229112
PBS	61	0.537048			PBS	61	0.0981385			PBS	61	0.239884
PBS	62	0.54047			PBS	62	0.103873			PBS	62	0.253957
PBS	63	0.507532			PBS	63	0.107921			PBS	63	0.25077
PBS	64	0.485789			PBS	64	0.114406			PBS	64	0.241402
PBS	65	0.543371			PBS	65	0.102996			PBS	65	0.236897
PBS	66	0.483836			PBS	66	0.10047			PBS	66	0.220336
PBS	67	0.459666			PBS	67	0.0668462			PBS	67	0.188192
PBS	68	0.436391			PBS	68	0.062923			PBS	68	0.187227
PBS	69	0.432933			PBS	69	0.0558215			PBS	69	0.172776
PBS	70	0.42119			PBS	70	0.0465786			PBS	70	0.152775
PBS	71	0.418297			PBS	71	0.0458626			PBS	71	0.161127
PBS	72	0.415314			PBS	72	0.0425942			PBS	72	0.134467
PBS	73	0.434967			PBS	73	0.0350952			PBS	73	0.121582
PBS	74	0.416162			PBS	74	0.0327601			PBS	74	0.116665
PBS	75	0.380208			PBS	75	0.0305389			PBS	75	0.102418
PBS	76	0.382567			PBS	76	0.031075			PBS	76	0.0996063
PBS	77	0.36941			PBS	77	0.0287631			PBS	77	0.100469
PBS	78	0.350185			PBS	78	0.0277185			PBS	78	0.0963308
PBS	79	0.347485			PBS	79	0.0308789			PBS	79	0.0987031
PBS	80	0.337576			PBS	80	0.0343664			PBS	80	0.0972193
PBS	81	0.303296			PBS	81	0.0384154			PBS	81	0.0896196
PBS	82	0.299419			PBS	82	0.0378213			PBS	82	0.0838822
PBS	83	0.282941			PBS	83	0.0303728			PBS	83	0.0877958
PBS	84	0.266681			PBS	84	0.0281253			PBS	84	0.0909482
PBS	85	0.256859			PBS	85	0.0299129			PBS	85	0.0977568
PBS	86	0.250696			PBS	86	0.0323417			PBS	86	0.0930778
PBS	87	0.247594			PBS	87	0.0295082			PBS	87	0.0800015
PBS	88	0.247219			PBS	88	0.0278909			PBS	88	0.081165
PBS	89	0.247767			PBS	89	0.0273587			PBS	89	0.0826982
PBS	90	0.245796			PBS	90	0.0215898			PBS	90	0.0774737
PBS	91	0.253269			PBS	91	0.0177395			PBS	91	0.0783029
PBS	92	0.263962			PBS	92	0.0170879			PBS	92	0.0798786
PBS	93	0.267731			PBS	93	0.0167557			PBS	93	0.0914885
PBS	94	0.27638			PBS	94	0.0172077			PBS	94	0.0950256
PBS	95	0.283181			PBS	95	0.0188674			PBS	95	0.102427
PBS	96	0.294783			PBS	96	0.0209525			PBS	96	0.114167
PBS	97	0.310486			PBS	97	0.0224777			PBS	97	0.133145
PBS	98	0.341873			PBS	98	0.0316483			PBS	98	0.172107
PBS	99	0.371007			PBS	99	0.0554062			PBS	99	0.229815
PBS	100	0.383954			PBS	100	0.118405			PBS	100	0.239318
PBS	1	0.517128			PBS	1	0.028677			PBS	1	0.109143
PBS	2	0.520617			PBS	2	0.027767			PBS	2	0.0891227
PBS	3	0.516902			PBS	3	0.0277006			PBS	3	0.0775652
PBS	4	0.509043			PBS	4	0.0292133			PBS	4	0.0747227
PBS	5	0.497655			PBS	5	0.0294955			PBS	5	0.074044
PBS	6	0.495387			PBS	6	0.029471			PBS	6	0.0707958
PBS	7	0.469999			PBS	7	0.0309626			PBS	7	0.0724692
PBS	8	0.464502			PBS	8	0.0317816			PBS	8	0.0744847
PBS	9	0.480186			PBS	9	0.032118			PBS	9	0.0765848
PBS	10	0.474189			PBS	10	0.0323259			PBS	10	0.0710188
PBS	11	0.458352			PBS	11	0.0301981			PBS	11	0.0685673
PBS	12	0.448678			PBS	12	0.0288477			PBS	12	0.0748911
PBS	13	0.453472			PBS	13	0.0290222			PBS	13	0.077169
PBS	14	0.443726			PBS	14	0.0277129			PBS	14	0.0750149
PBS	15	0.442035			PBS	15	0.0276589			PBS	15	0.0795261
PBS	16	0.459975			PBS	16	0.0270731			PBS	16	0.0904054
PBS	17	0.466929			PBS	17	0.0284072			PBS	17	0.0951838
PBS	18	0.451208			PBS	18	0.0253278			PBS	18	0.0929557
PBS	19	0.464888			PBS	19	0.0231004			PBS	19	0.089405
PBS	20	0.559877			PBS	20	0.0242335			PBS	20	0.0862454
PBS	21	0.695919			PBS	21	0.0301733			PBS	21	0.096036
PBS	22	0.881283			PBS	22	0.0544213			PBS	22	0.109579
PBS	23	0.89603			PBS	23	0.0959067			PBS	23	0.210118
PBS	24	0.852163			PBS	24	0.116456			PBS	24	0.291799
PBS	25	1.00992			PBS	25	0.238266			PBS	25	0.359234
PBS	26	1.02617			PBS	26	0.289039			PBS	26	0.415849
PBS	27	1.04053			PBS	27	0.342477			PBS	27	0.443055
PBS	28	0.965321			PBS	28	0.399883			PBS	28	0.470167
PBS	29	0.895884			PBS	29	0.435862			PBS	29	0.469974
PBS	30	0.930577			PBS	30	0.370436			PBS	30	0.409897
PBS	31	0.876011			PBS	31	0.397177			PBS	31	0.42712
PBS	32	0.874621			PBS	32	0.434287			PBS	32	0.44609
PBS	33	0.940402			PBS	33	0.435538			PBS	33	0.415631
PBS	34	0.875062			PBS	34	0.418911			PBS	34	0.471949
PBS	35	0.911194			PBS	35	0.607169			PBS	35	0.510228
PBS	36	0.895853			PBS	36	0.77029			PBS	36	0.584887
PBS	37	0.93821			PBS	37	0.786019			PBS	37	0.723293
PBS	38	0.958541			PBS	38	0.836377			PBS	38	0.950392
PBS	39	0.875827			PBS	39	1.14927			PBS	39	1.17573
PBS	40	0.854687			PBS	40	1.2276			PBS	40	1.27264
PBS	41	0.899481			PBS	41	1.24909			PBS	41	1.49999
PBS	42	0.893086			PBS	42	0.955938			PBS	42	1.10452
PBS	43	0.801503			PBS	43	0.877102			PBS	43	1.0366
PBS	44	0.725987			PBS	44	0.73798			PBS	44	0.950189
PBS	45	0.746864			PBS	45	0.669965			PBS	45	0.838202
PBS	46	0.725626			PBS	46	0.525166			PBS	46	0.765057
PBS	47	0.704637			PBS	47	0.4888			PBS	47	0.640864
PBS	48	0.699043			PBS	48	0.540002			PBS	48	0.663568
PBS	49	0.625252			PBS	49	0.504679			PBS	49	0.67061
PBS	50	0.641762			PBS	50	0.391214			PBS	50	0.623591
PBS	51	0.597195			PBS	51	0.288063			PBS	51	0.586937
PBS	52	0.584155			PBS	52	0.238777			PBS	52	0.516199
PBS	53	0.584224			PBS	53	0.194744			PBS	53	0.466492
PBS	54	0.571008			PBS	54	0.144549			PBS	54	0.400177
PBS	55	0.557694			PBS	55	0.130519			PBS	55	0.372535
PBS	56	0.511642			PBS	56	0.126106			PBS	56	0.36329
PBS	57	0.492951			PBS	57	0.120246			PBS	57	0.35607
PBS	58	0.495817			PBS	58	0.110522			PBS	58	0.353866
PBS	59	0.464325			PBS	59	0.0930062			PBS	59	0.291131
PBS	60	0.44796			PBS	60	0.0794165			PBS	60	0.275503
PBS	61	0.463742			PBS	61	0.0695018			PBS	61	0.257269
PBS	62	0.475949			PBS	62	0.0555059			PBS	62	0.219605
PBS	63	0.455962			PBS	63	0.0502868			PBS	63	0.222002
PBS	64	0.466292			PBS	64	0.0530915			PBS	64	0.233218
PBS	65	0.468615			PBS	65	0.0545208			PBS	65	0.212836
PBS	66	0.453918			PBS	66	0.0456483			PBS	66	0.19392
PBS	67	0.462833			PBS	67	0.040288			PBS	67	0.183556
PBS	68	0.450833			PBS	68	0.0430222			PBS	68	0.182432
PBS	69	0.458042			PBS	69	0.0441192			PBS	69	0.170814
PBS	70	0.453155			PBS	70	0.0399057			PBS	70	0.157672
PBS	71	0.435423			PBS	71	0.0358249			PBS	71	0.141752
PBS	72	0.448875			PBS	72	0.0325209			PBS	72	0.128441
PBS	73	0.417127			PBS	73	0.0289349			PBS	73	0.122038
PBS	74	0.420697			PBS	74	0.0270026			PBS	74	0.122632
PBS	75	0.425854			PBS	75	0.0274096			PBS	75	0.116512
PBS	76	0.408576			PBS	76	0.0253609			PBS	76	0.102726
PBS	77	0.394018			PBS	77	0.0235492			PBS	77	0.0961246
PBS	78	0.371292			PBS	78	0.021916			PBS	78	0.0958823
PBS	79	0.366122			PBS	79	0.0209643			PBS	79	0.0837203
PBS	80	0.371536			PBS	80	0.0217425			PBS	80	0.0836678
PBS	81	0.344554			PBS	81	0.0219656			PBS	81	0.0853795
PBS	82	0.361852			PBS	82	0.0242265			PBS	82	0.0951393
PBS	83	0.330842			PBS	83	0.0209933			PBS	83	0.0784413
PBS	84	0.321761			PBS	84	0.0206111			PBS	84	0.0766443
PBS	85	0.326495			PBS	85	0.0203616			PBS	85	0.0754953
PBS	86	0.327438			PBS	86	0.020424			PBS	86	0.0747528
PBS	87	0.32182			PBS	87	0.0181926			PBS	87	0.0756192
PBS	88	0.330834			PBS	88	0.0173071			PBS	88	0.0758319
PBS	89	0.332348			PBS	89	0.0151592			PBS	89	0.0745739
PBS	90	0.330745			PBS	90	0.0145149			PBS	90	0.0735641
PBS	91	0.356992			PBS	91	0.0115145			PBS	91	0.0728656
PBS	92	0.397812			PBS	92	0.0118343			PBS	92	0.0768173
PBS	93	0.400175			PBS	93	0.0101055			PBS	93	0.073351
PBS	94	0.424036			PBS	94	0.0118427			PBS	94	0.0783424
PBS	95	0.453323			PBS	95	0.0113565			PBS	95	0.0871174
PBS	96	0.45869			PBS	96	0.0105255			PBS	96	0.0917574
PBS	97	0.474201			PBS	97	0.0127901			PBS	97	0.113605
PBS	98	0.495441			PBS	98	0.0105544			PBS	98	0.122959
PBS	99	0.523434			PBS	99	0.0151673			PBS	99	0.154424
PBS	100	0.550641			PBS	100	0.0284663			PBS	100	0.258386
PBS	1	0.530499			PBS	1	0.0222665			PBS	1	0.0721098
PBS	2	0.480304			PBS	2	0.018148			PBS	2	0.0472124
PBS	3	0.465183			PBS	3	0.0169904			PBS	3	0.0406969
PBS	4	0.457011			PBS	4	0.0167988			PBS	4	0.0415874
PBS	5	0.428476			PBS	5	0.0169433			PBS	5	0.0423562
PBS	6	0.432245			PBS	6	0.0190319			PBS	6	0.0409753
PBS	7	0.430569			PBS	7	0.0206238			PBS	7	0.0456839
PBS	8	0.422683			PBS	8	0.0202404			PBS	8	0.0480142
PBS	9	0.40366			PBS	9	0.023733			PBS	9	0.0491421
PBS	10	0.391649			PBS	10	0.0264283			PBS	10	0.0527959
PBS	11	0.395765			PBS	11	0.0280161			PBS	11	0.0572376
PBS	12	0.387155			PBS	12	0.0314147			PBS	12	0.0616932
PBS	13	0.381067			PBS	13	0.0305542			PBS	13	0.0680359
PBS	14	0.389137			PBS	14	0.0302846			PBS	14	0.0673839
PBS	15	0.388414			PBS	15	0.0293926			PBS	15	0.0632079
PBS	16	0.415825			PBS	16	0.0304096			PBS	16	0.0646852
PBS	17	0.454207			PBS	17	0.0320431			PBS	17	0.0687259
PBS	18	0.533265			PBS	18	0.0334249			PBS	18	0.0647601
PBS	19	0.684734			PBS	19	0.0358697			PBS	19	0.0703057
PBS	20	0.768483			PBS	20	0.0351227			PBS	20	0.0697046
PBS	21	0.863401			PBS	21	0.0401053			PBS	21	0.0806614
PBS	22	0.814313			PBS	22	0.0397337			PBS	22	0.0962191
PBS	23	0.802785			PBS	23	0.0460974			PBS	23	0.119401
PBS	24	0.802972			PBS	24	0.0791623			PBS	24	0.165182
PBS	25	0.800148			PBS	25	0.183352			PBS	25	0.27129
PBS	26	0.791027			PBS	26	0.395858			PBS	26	0.325181
PBS	27	0.747676			PBS	27	0.551957			PBS	27	0.419171
PBS	28	0.699486			PBS	28	0.715648			PBS	28	0.503755
PBS	29	0.758265			PBS	29	0.798334			PBS	29	0.516667
PBS	30	0.808237			PBS	30	0.805429			PBS	30	0.587713
PBS	31	0.723452			PBS	31	1.08678			PBS	31	0.671133
PBS	32	0.710129			PBS	32	1.03126			PBS	32	0.733595
PBS	33	0.750433			PBS	33	0.868129			PBS	33	0.721659
PBS	34	0.785617			PBS	34	0.861573			PBS	34	0.616409
PBS	35	0.860254			PBS	35	0.810165			PBS	35	0.513456
PBS	36	0.882084			PBS	36	0.81442			PBS	36	0.539252
PBS	37	0.904649			PBS	37	0.702185			PBS	37	0.544514
PBS	38	0.896198			PBS	38	0.589602			PBS	38	0.579068
PBS	39	0.857668			PBS	39	0.652752			PBS	39	0.571715
PBS	40	0.861487			PBS	40	0.841455			PBS	40	0.659407
PBS	41	0.797272			PBS	41	0.890325			PBS	41	0.666897
PBS	42	0.813658			PBS	42	1.21591			PBS	42	0.781637
PBS	43	0.773238			PBS	43	1.1592			PBS	43	0.793973
PBS	44	0.71166			PBS	44	1.06698			PBS	44	0.777242
PBS	45	0.67723			PBS	45	1.26013			PBS	45	0.933913
PBS	46	0.644917			PBS	46	1.47017			PBS	46	1.04751
PBS	47	0.6618			PBS	47	1.26946			PBS	47	1.04617
PBS	48	0.671317			PBS	48	0.881118			PBS	48	0.928506
PBS	49	0.642425			PBS	49	0.784394			PBS	49	0.798909
PBS	50	0.592077			PBS	50	0.709161			PBS	50	0.679013
PBS	51	0.580396			PBS	51	0.677439			PBS	51	0.667992
PBS	52	0.554014			PBS	52	0.522482			PBS	52	0.626927
PBS	53	0.511864			PBS	53	0.450967			PBS	53	0.554679
PBS	54	0.519474			PBS	54	0.413404			PBS	54	0.546951
PBS	55	0.485613			PBS	55	0.396108			PBS	55	0.565123
PBS	56	0.474919			PBS	56	0.322762			PBS	56	0.478016
PBS	57	0.464423			PBS	57	0.286349			PBS	57	0.467777
PBS	58	0.444249			PBS	58	0.253272			PBS	58	0.426428
PBS	59	0.454076			PBS	59	0.209612			PBS	59	0.36811
PBS	60	0.448417			PBS	60	0.160797			PBS	60	0.322976
PBS	61	0.432304			PBS	61	0.14454			PBS	61	0.312325
PBS	62	0.416651			PBS	62	0.150498			PBS	62	0.287849
PBS	63	0.415287			PBS	63	0.126914			PBS	63	0.283399
PBS	64	0.429319			PBS	64	0.116956			PBS	64	0.234495
PBS	65	0.400019			PBS	65	0.107022			PBS	65	0.218756
PBS	66	0.388108			PBS	66	0.0976504			PBS	66	0.212981
PBS	67	0.389661			PBS	67	0.0943142			PBS	67	0.213251
PBS	68	0.390107			PBS	68	0.0778913			PBS	68	0.209262
PBS	69	0.381055			PBS	69	0.0577993			PBS	69	0.194903
PBS	70	0.367287			PBS	70	0.0510566			PBS	70	0.181391
PBS	71	0.362823			PBS	71	0.0550693			PBS	71	0.167233
PBS	72	0.36341			PBS	72	0.0479676			PBS	72	0.141747
PBS	73	0.349211			PBS	73	0.0411107			PBS	73	0.139707
PBS	74	0.343792			PBS	74	0.0353846			PBS	74	0.126732
PBS	75	0.331515			PBS	75	0.0349192			PBS	75	0.120687
PBS	76	0.326326			PBS	76	0.0321227			PBS	76	0.116274
PBS	77	0.315439			PBS	77	0.0301867			PBS	77	0.0993086
PBS	78	0.309711			PBS	78	0.0266392			PBS	78	0.0889251
PBS	79	0.316899			PBS	79	0.0246446			PBS	79	0.0821162
PBS	80	0.320487			PBS	80	0.0240345			PBS	80	0.0795246
PBS	81	0.312986			PBS	81	0.0248282			PBS	81	0.0781312
PBS	82	0.311259			PBS	82	0.0241399			PBS	82	0.0796689
PBS	83	0.300698			PBS	83	0.0229299			PBS	83	0.0716079
PBS	84	0.299927			PBS	84	0.0225873			PBS	84	0.0690101
PBS	85	0.30002			PBS	85	0.0220318			PBS	85	0.0713452
PBS	86	0.310638			PBS	86	0.0231854			PBS	86	0.0774229
PBS	87	0.315815			PBS	87	0.022857			PBS	87	0.0791891
PBS	88	0.334833			PBS	88	0.0223135			PBS	88	0.0743282
PBS	89	0.339147			PBS	89	0.0256378			PBS	89	0.0718998
PBS	90	0.3619			PBS	90	0.0162002			PBS	90	0.0708184
PBS	91	0.356179			PBS	91	0.0137323			PBS	91	0.0623736
PBS	92	0.386168			PBS	92	0.011898			PBS	92	0.0572794
PBS	93	0.393884			PBS	93	0.0111625			PBS	93	0.0612225
PBS	94	0.421611			PBS	94	0.0106252			PBS	94	0.0616645
PBS	95	0.46545			PBS	95	0.0095435			PBS	95	0.0668338
PBS	96	0.539713			PBS	96	0.0126215			PBS	96	0.0788674
PBS	97	0.511067			PBS	97	0.0103845			PBS	97	0.0869583
PBS	98	0.535919			PBS	98	0.00836219			PBS	98	0.0850054
PBS	99	0.500715			PBS	99	0.00767768			PBS	99	0.087569
PBS	100	0.467322			PBS	100	0.00794308			PBS	100	0.109917
PBS	1	0.953509			PBS	1	0.0393612			PBS	1	0.116848
PBS	2	0.989926			PBS	2	0.03826			PBS	2	0.107148
PBS	3	0.897059			PBS	3	0.0363357			PBS	3	0.107781
PBS	4	0.856311			PBS	4	0.0380026			PBS	4	0.109485
PBS	5	0.803611			PBS	5	0.0407908			PBS	5	0.116031
PBS	6	0.806348			PBS	6	0.0401799			PBS	6	0.124494
PBS	7	0.842209			PBS	7	0.0373541			PBS	7	0.117834
PBS	8	0.759901			PBS	8	0.0373832			PBS	8	0.120746
PBS	9	0.749687			PBS	9	0.0337301			PBS	9	0.118374
PBS	10	0.696582			PBS	10	0.0342082			PBS	10	0.11723
PBS	11	0.73424			PBS	11	0.0314409			PBS	11	0.11057
PBS	12	0.710262			PBS	12	0.0298824			PBS	12	0.101151
PBS	13	0.708628			PBS	13	0.0302979			PBS	13	0.101161
PBS	14	0.695751			PBS	14	0.0306637			PBS	14	0.10127
PBS	15	0.649878			PBS	15	0.0317731			PBS	15	0.106856
PBS	16	0.564257			PBS	16	0.0301232			PBS	16	0.123197
PBS	17	0.595927			PBS	17	0.0248915			PBS	17	0.115858
PBS	18	0.636612			PBS	18	0.0284153			PBS	18	0.114496
PBS	19	0.702177			PBS	19	0.0335767			PBS	19	0.121325
PBS	20	0.646141			PBS	20	0.0385135			PBS	20	0.122976
PBS	21	0.625042			PBS	21	0.0601808			PBS	21	0.158499
PBS	22	0.651389			PBS	22	0.116166			PBS	22	0.263786
PBS	23	0.718035			PBS	23	0.206193			PBS	23	0.4199
PBS	24	0.865695			PBS	24	0.290577			PBS	24	0.515813
PBS	25	1.06193			PBS	25	0.22907			PBS	25	0.41223
PBS	26	1.07253			PBS	26	0.3622			PBS	26	0.496367
PBS	27	1.24471			PBS	27	0.425947			PBS	27	0.570735
PBS	28	1.27476			PBS	28	0.454496			PBS	28	0.607552
PBS	29	1.12123			PBS	29	0.526587			PBS	29	0.544762
PBS	30	1.06286			PBS	30	0.422493			PBS	30	0.418424
PBS	31	1.13777			PBS	31	0.413363			PBS	31	0.469161
PBS	32	1.0255			PBS	32	0.476504			PBS	32	0.505122
PBS	33	0.948349			PBS	33	0.66209			PBS	33	0.590483
PBS	34	0.950071			PBS	34	0.784556			PBS	34	0.720649
PBS	35	0.964481			PBS	35	0.741442			PBS	35	0.786034
PBS	36	1.00807			PBS	36	1.18947			PBS	36	1.02496
PBS	37	0.969571			PBS	37	1.06289			PBS	37	1.18786
PBS	38	0.913502			PBS	38	1.06921			PBS	38	1.09054
PBS	39	0.875323			PBS	39	1.09096			PBS	39	1.03604
PBS	40	0.941412			PBS	40	0.816446			PBS	40	0.916179
PBS	41	1.15662			PBS	41	0.82162			PBS	41	0.914768
PBS	42	1.19763			PBS	42	0.750268			PBS	42	0.723511
PBS	43	1.01882			PBS	43	0.663083			PBS	43	0.789876
PBS	44	0.914179			PBS	44	0.571967			PBS	44	0.626731
PBS	45	1.00553			PBS	45	0.515118			PBS	45	0.679815
PBS	46	0.891079			PBS	46	0.441621			PBS	46	0.619486
PBS	47	0.742296			PBS	47	0.356527			PBS	47	0.472905
PBS	48	0.752607			PBS	48	0.31591			PBS	48	0.469498
PBS	49	0.733775			PBS	49	0.288105			PBS	49	0.399325
PBS	50	0.6812			PBS	50	0.244719			PBS	50	0.409575
PBS	51	0.709805			PBS	51	0.250097			PBS	51	0.400954
PBS	52	0.685125			PBS	52	0.217592			PBS	52	0.415072
PBS	53	0.603627			PBS	53	0.216341			PBS	53	0.433023
PBS	54	0.579618			PBS	54	0.182306			PBS	54	0.397181
PBS	55	0.563955			PBS	55	0.175803			PBS	55	0.355411
PBS	56	0.525737			PBS	56	0.156492			PBS	56	0.349305
PBS	57	0.467705			PBS	57	0.136956			PBS	57	0.319926
PBS	58	0.439653			PBS	58	0.103657			PBS	58	0.292864
PBS	59	0.490944			PBS	59	0.10871			PBS	59	0.295112
PBS	60	0.501646			PBS	60	0.0933793			PBS	60	0.275639
PBS	61	0.479102			PBS	61	0.0914189			PBS	61	0.288417
PBS	62	0.456537			PBS	62	0.0819232			PBS	62	0.264202
PBS	63	0.43477			PBS	63	0.0721325			PBS	63	0.252025
PBS	64	0.470433			PBS	64	0.0684548			PBS	64	0.251199
PBS	65	0.446147			PBS	65	0.0684341			PBS	65	0.243736
PBS	66	0.461582			PBS	66	0.0505234			PBS	66	0.218452
PBS	67	0.441027			PBS	67	0.0405208			PBS	67	0.202353
PBS	68	0.458818			PBS	68	0.045574			PBS	68	0.216312
PBS	69	0.487989			PBS	69	0.0385885			PBS	69	0.169581
PBS	70	0.481692			PBS	70	0.0294583			PBS	70	0.150006
PBS	71	0.457069			PBS	71	0.0266284			PBS	71	0.143282
PBS	72	0.478854			PBS	72	0.0213716			PBS	72	0.129971
PBS	73	0.472519			PBS	73	0.0195304			PBS	73	0.119533
PBS	74	0.462111			PBS	74	0.0198132			PBS	74	0.11311
PBS	75	0.454954			PBS	75	0.0169127			PBS	75	0.0962238
PBS	76	0.457821			PBS	76	0.015043			PBS	76	0.0898457
PBS	77	0.451409			PBS	77	0.0151755			PBS	77	0.081868
PBS	78	0.463999			PBS	78	0.0167422			PBS	78	0.0837053
PBS	79	0.440551			PBS	79	0.0166925			PBS	79	0.0781841
PBS	80	0.444042			PBS	80	0.0162276			PBS	80	0.0820086
PBS	81	0.437229			PBS	81	0.0151506			PBS	81	0.0740245
PBS	82	0.417462			PBS	82	0.0168295			PBS	82	0.0700976
PBS	83	0.422878			PBS	83	0.0184293			PBS	83	0.0708947
PBS	84	0.422839			PBS	84	0.0162351			PBS	84	0.0757328
PBS	85	0.401619			PBS	85	0.0142821			PBS	85	0.0690478
PBS	86	0.406076			PBS	86	0.0126487			PBS	86	0.0678147
PBS	87	0.418352			PBS	87	0.0100682			PBS	87	0.0670226
PBS	88	0.421189			PBS	88	0.0114063			PBS	88	0.0666066
PBS	89	0.437449			PBS	89	0.00999339			PBS	89	0.0685774
PBS	90	0.454203			PBS	90	0.00763724			PBS	90	0.0662249
PBS	91	0.508224			PBS	91	0.00686439			PBS	91	0.0688897
PBS	92	0.546238			PBS	92	0.0057547			PBS	92	0.0732371
PBS	93	0.545744			PBS	93	0.0060831			PBS	93	0.0744551
PBS	94	0.567441			PBS	94	0.00522288			PBS	94	0.0797242
PBS	95	0.573924			PBS	95	0.00534725			PBS	95	0.0887466
PBS	96	0.589685			PBS	96	0.00761615			PBS	96	0.109232
PBS	97	0.608036			PBS	97	0.0089753			PBS	97	0.127802
PBS	98	0.639731			PBS	98	0.014091			PBS	98	0.158484
PBS	99	0.707573			PBS	99	0.0300029			PBS	99	0.213906
PBS	100	0.69679			PBS	100	0.0492702			PBS	100	0.261071
PBS	1	0.426256			PBS	1	0.037575			PBS	1	0.115192
PBS	2	0.433182			PBS	2	0.0328854			PBS	2	0.10588
PBS	3	0.431862			PBS	3	0.0322478			PBS	3	0.10568
PBS	4	0.415392			PBS	4	0.0339489			PBS	4	0.098815
PBS	5	0.419675			PBS	5	0.0307889			PBS	5	0.0916751
PBS	6	0.424963			PBS	6	0.027797			PBS	6	0.0911156
PBS	7	0.424384			PBS	7	0.0286533			PBS	7	0.0928724
PBS	8	0.422206			PBS	8	0.0262361			PBS	8	0.0873683
PBS	9	0.406952			PBS	9	0.0252861			PBS	9	0.0867205
PBS	10	0.400904			PBS	10	0.0250323			PBS	10	0.0857158
PBS	11	0.396735			PBS	11	0.0223485			PBS	11	0.0829547
PBS	12	0.390605			PBS	12	0.0210305			PBS	12	0.0845581
PBS	13	0.409777			PBS	13	0.0186642			PBS	13	0.0815006
PBS	14	0.428449			PBS	14	0.0184453			PBS	14	0.0829969
PBS	15	0.403005			PBS	15	0.0201701			PBS	15	0.0899829
PBS	16	0.410653			PBS	16	0.0231504			PBS	16	0.0926162
PBS	17	0.435445			PBS	17	0.0241828			PBS	17	0.096545
PBS	18	0.456543			PBS	18	0.0212418			PBS	18	0.0986886
PBS	19	0.548588			PBS	19	0.0250708			PBS	19	0.110714
PBS	20	0.676847			PBS	20	0.0478534			PBS	20	0.132087
PBS	21	0.659293			PBS	21	0.0591213			PBS	21	0.159645
PBS	22	0.654914			PBS	22	0.084638			PBS	22	0.210851
PBS	23	0.708121			PBS	23	0.160761			PBS	23	0.289238
PBS	24	0.838754			PBS	24	0.368981			PBS	24	0.368725
PBS	25	0.832851			PBS	25	0.402718			PBS	25	0.370398
PBS	26	0.723547			PBS	26	0.474406			PBS	26	0.412553
PBS	27	0.676813			PBS	27	0.614813			PBS	27	0.494133
PBS	28	0.723			PBS	28	0.823181			PBS	28	0.566004
PBS	29	0.784307			PBS	29	0.726407			PBS	29	0.559162
PBS	30	0.714391			PBS	30	0.772771			PBS	30	0.574374
PBS	31	0.802435			PBS	31	0.765437			PBS	31	0.581393
PBS	32	0.833447			PBS	32	0.726896			PBS	32	0.546947
PBS	33	0.75025			PBS	33	0.798498			PBS	33	0.51799
PBS	34	0.64941			PBS	34	0.801279			PBS	34	0.529059
PBS	35	0.65642			PBS	35	0.963456			PBS	35	0.525294
PBS	36	0.748265			PBS	36	1.01806			PBS	36	0.596582
PBS	37	0.719258			PBS	37	0.937963			PBS	37	0.650562
PBS	38	0.778137			PBS	38	1.09665			PBS	38	0.732514
PBS	39	0.749221			PBS	39	1.10293			PBS	39	0.829743
PBS	40	0.632565			PBS	40	1.02148			PBS	40	0.81167
PBS	41	0.704531			PBS	41	0.958532			PBS	41	0.872118
PBS	42	0.675214			PBS	42	0.82385			PBS	42	0.893272
PBS	43	0.663223			PBS	43	0.865903			PBS	43	0.936215
PBS	44	0.646015			PBS	44	0.826592			PBS	44	0.861622
PBS	45	0.51762			PBS	45	0.719715			PBS	45	0.769114
PBS	46	0.513884			PBS	46	0.648473			PBS	46	0.724386
PBS	47	0.467093			PBS	47	0.599282			PBS	47	0.746412
PBS	48	0.438803			PBS	48	0.621595			PBS	48	0.671525
PBS	49	0.429659			PBS	49	0.476182			PBS	49	0.619047
PBS	50	0.424979			PBS	50	0.433476			PBS	50	0.654481
PBS	51	0.411937			PBS	51	0.436863			PBS	51	0.576229
PBS	52	0.392733			PBS	52	0.286665			PBS	52	0.484368
PBS	53	0.397117			PBS	53	0.235078			PBS	53	0.407319
PBS	54	0.411614			PBS	54	0.268017			PBS	54	0.440643
PBS	55	0.387239			PBS	55	0.229911			PBS	55	0.396283
PBS	56	0.410551			PBS	56	0.191116			PBS	56	0.403642
PBS	57	0.388438			PBS	57	0.163221			PBS	57	0.377165
PBS	58	0.39015			PBS	58	0.15667			PBS	58	0.328914
PBS	59	0.393459			PBS	59	0.133641			PBS	59	0.310272
PBS	60	0.378083			PBS	60	0.12285			PBS	60	0.319421
PBS	61	0.368965			PBS	61	0.0978693			PBS	61	0.288889
PBS	62	0.393837			PBS	62	0.0914199			PBS	62	0.288697
PBS	63	0.382025			PBS	63	0.0810163			PBS	63	0.278919
PBS	64	0.365704			PBS	64	0.068039			PBS	64	0.269761
PBS	65	0.364023			PBS	65	0.0649491			PBS	65	0.258338
PBS	66	0.378248			PBS	66	0.0566418			PBS	66	0.260771
PBS	67	0.379068			PBS	67	0.0479511			PBS	67	0.231759
PBS	68	0.368081			PBS	68	0.0460698			PBS	68	0.204653
PBS	69	0.351705			PBS	69	0.041541			PBS	69	0.188192
PBS	70	0.344455			PBS	70	0.0380316			PBS	70	0.162886
PBS	71	0.360186			PBS	71	0.0294003			PBS	71	0.164907
PBS	72	0.351721			PBS	72	0.0265139			PBS	72	0.152165
PBS	73	0.354179			PBS	73	0.024539			PBS	73	0.141068
PBS	74	0.354024			PBS	74	0.0201505			PBS	74	0.128955
PBS	75	0.355745			PBS	75	0.019517			PBS	75	0.135121
PBS	76	0.348942			PBS	76	0.0179994			PBS	76	0.129696
PBS	77	0.351652			PBS	77	0.0142758			PBS	77	0.111636
PBS	78	0.330171			PBS	78	0.0137947			PBS	78	0.109105
PBS	79	0.327812			PBS	79	0.0142289			PBS	79	0.114367
PBS	80	0.327023			PBS	80	0.0122772			PBS	80	0.106058
PBS	81	0.313146			PBS	81	0.0117688			PBS	81	0.104766
PBS	82	0.30812			PBS	82	0.0119642			PBS	82	0.105983
PBS	83	0.323827			PBS	83	0.011992			PBS	83	0.105405
PBS	84	0.335173			PBS	84	0.0138183			PBS	84	0.111869
PBS	85	0.351883			PBS	85	0.010216			PBS	85	0.0993044
PBS	86	0.352761			PBS	86	0.0097116			PBS	86	0.090845
PBS	87	0.384279			PBS	87	0.00851883			PBS	87	0.0901226
PBS	88	0.410321			PBS	88	0.00705191			PBS	88	0.0896194
PBS	89	0.433215			PBS	89	0.00526446			PBS	89	0.0853227
PBS	90	0.439978			PBS	90	0.00354413			PBS	90	0.0832894
PBS	91	0.461511			PBS	91	0.00343006			PBS	91	0.0829361
PBS	92	0.488149			PBS	92	0.00238587			PBS	92	0.0834866
PBS	93	0.529571			PBS	93	0.00328533			PBS	93	0.0837984
PBS	94	0.533026			PBS	94	0.00452131			PBS	94	0.0990245
PBS	95	0.576832			PBS	95	0.00578882			PBS	95	0.125264
PBS	96	0.583314			PBS	96	0.00540931			PBS	96	0.129044
PBS	97	0.587007			PBS	97	0.00677437			PBS	97	0.130423
PBS	98	0.657101			PBS	98	0.00764263			PBS	98	0.161407
PBS	99	0.670373			PBS	99	0.014804			PBS	99	0.287527
PBS	100	0.658628			PBS	100	0.0489381			PBS	100	0.548264
Hase	1	0.432705			HAase	1	0.0408207			HAase	1	0.114153
Hase	2	0.425082			HAase	2	0.0430463			HAase	2	0.123935
Hase	3	0.433531			HAase	3	0.0452439			HAase	3	0.123607
Hase	4	0.430013			HAase	4	0.0459136			HAase	4	0.132091
Hase	5	0.423613			HAase	5	0.0449551			HAase	5	0.119545
Hase	6	0.40685			HAase	6	0.0491556			HAase	6	0.110331
Hase	7	0.408074			HAase	7	0.0473447			HAase	7	0.10513
Hase	8	0.404882			HAase	8	0.044675			HAase	8	0.105744
Hase	9	0.393837			HAase	9	0.0483737			HAase	9	0.10314
Hase	10	0.390371			HAase	10	0.052093			HAase	10	0.0950679
Hase	11	0.393781			HAase	11	0.0537711			HAase	11	0.0995605
Hase	12	0.374105			HAase	12	0.0541112			HAase	12	0.0976359
Hase	13	0.387445			HAase	13	0.0533113			HAase	13	0.0985213
Hase	14	0.379354			HAase	14	0.0490111			HAase	14	0.0959252
Hase	15	0.379465			HAase	15	0.0501768			HAase	15	0.0976031
Hase	16	0.379401			HAase	16	0.0464532			HAase	16	0.0943825
Hase	17	0.385507			HAase	17	0.0495315			HAase	17	0.0939587
Hase	18	0.39055			HAase	18	0.0453951			HAase	18	0.0917244
Hase	19	0.379663			HAase	19	0.052351			HAase	19	0.0977242
Hase	20	0.395751			HAase	20	0.072224			HAase	20	0.113468
Hase	21	0.400284			HAase	21	0.0941814			HAase	21	0.144004
Hase	22	0.422691			HAase	22	0.10277			HAase	22	0.167112
Hase	23	0.423296			HAase	23	0.162232			HAase	23	0.211881
Hase	24	0.433166			HAase	24	0.217128			HAase	24	0.252241
Hase	25	0.426408			HAase	25	0.211153			HAase	25	0.253389
Hase	26	0.437809			HAase	26	0.243886			HAase	26	0.273625
Hase	27	0.43026			HAase	27	0.301458			HAase	27	0.290254
Hase	28	0.442853			HAase	28	0.289662			HAase	28	0.276011
Hase	29	0.426917			HAase	29	0.342321			HAase	29	0.248337
Hase	30	0.409088			HAase	30	0.403856			HAase	30	0.253925
Hase	31	0.382085			HAase	31	0.433405			HAase	31	0.24087
Hase	32	0.367856			HAase	32	0.491756			HAase	32	0.242506
Hase	33	0.356715			HAase	33	0.509219			HAase	33	0.280444
Hase	34	0.350853			HAase	34	0.605307			HAase	34	0.33056
Hase	35	0.329877			HAase	35	0.682003			HAase	35	0.353522
Hase	36	0.318736			HAase	36	0.63092			HAase	36	0.353578
Hase	37	0.328789			HAase	37	0.591933			HAase	37	0.363817
Hase	38	0.347339			HAase	38	0.594307			HAase	38	0.354729
Hase	39	0.352253			HAase	39	0.620127			HAase	39	0.435889
Hase	40	0.348632			HAase	40	0.641703			HAase	40	0.469841
Hase	41	0.344368			HAase	41	0.555008			HAase	41	0.476315
Hase	42	0.354222			HAase	42	0.555849			HAase	42	0.555117
Hase	43	0.346163			HAase	43	0.567844			HAase	43	0.614246
Hase	44	0.357605			HAase	44	0.344864			HAase	44	0.444399
Hase	45	0.342907			HAase	45	0.323213			HAase	45	0.364735
Hase	46	0.338832			HAase	46	0.292212			HAase	46	0.352357
Hase	47	0.340088			HAase	47	0.305639			HAase	47	0.431364
Hase	48	0.341509			HAase	48	0.298673			HAase	48	0.363766
Hase	49	0.341279			HAase	49	0.248993			HAase	49	0.309773
Hase	50	0.335812			HAase	50	0.282628			HAase	50	0.328809
Hase	51	0.30546			HAase	51	0.287683			HAase	51	0.303509
Hase	52	0.305373			HAase	52	0.294934			HAase	52	0.316172
Hase	53	0.305651			HAase	53	0.25233			HAase	53	0.274786
Hase	54	0.303406			HAase	54	0.22043			HAase	54	0.233339
Hase	55	0.29964			HAase	55	0.197801			HAase	55	0.255684
Hase	56	0.29297			HAase	56	0.188425			HAase	56	0.288926
Hase	57	0.27986			HAase	57	0.186438			HAase	57	0.282098
Hase	58	0.276471			HAase	58	0.181256			HAase	58	0.240516
Hase	59	0.286324			HAase	59	0.161426			HAase	59	0.200388
Hase	60	0.282036			HAase	60	0.151625			HAase	60	0.250136
Hase	61	0.282115			HAase	61	0.134322			HAase	61	0.230765
Hase	62	0.282316			HAase	62	0.134556			HAase	62	0.243448
Hase	63	0.267116			HAase	63	0.126022			HAase	63	0.258306
Hase	64	0.263693			HAase	64	0.116686			HAase	64	0.258963
Hase	65	0.255277			HAase	65	0.0822873			HAase	65	0.208982
Hase	66	0.246712			HAase	66	0.0726708			HAase	66	0.182122
Hase	67	0.251028			HAase	67	0.0589061			HAase	67	0.168006
Hase	68	0.252386			HAase	68	0.0534699			HAase	68	0.158307
Hase	69	0.246923			HAase	69	0.0497974			HAase	69	0.15732
Hase	70	0.240569			HAase	70	0.038408			HAase	70	0.130796
Hase	71	0.244089			HAase	71	0.0349008			HAase	71	0.140046
Hase	72	0.240079			HAase	72	0.0377781			HAase	72	0.128368
Hase	73	0.234496			HAase	73	0.0325452			HAase	73	0.123651
Hase	74	0.228352			HAase	74	0.0293495			HAase	74	0.111571
Hase	75	0.219259			HAase	75	0.0255871			HAase	75	0.102995
Hase	76	0.224182			HAase	76	0.0223194			HAase	76	0.0938332
Hase	77	0.22847			HAase	77	0.0229664			HAase	77	0.0942662
Hase	78	0.221316			HAase	78	0.0251139			HAase	78	0.0867671
Hase	79	0.21621			HAase	79	0.0250981			HAase	79	0.0921221
Hase	80	0.214407			HAase	80	0.0225441			HAase	80	0.0912786
Hase	81	0.214002			HAase	81	0.0220476			HAase	81	0.0959676
Hase	82	0.218407			HAase	82	0.0214882			HAase	82	0.0974293
Hase	83	0.222181			HAase	83	0.0209486			HAase	83	0.0945549
Hase	84	0.220037			HAase	84	0.0219888			HAase	84	0.102893
Hase	85	0.226778			HAase	85	0.0217541			HAase	85	0.106463
Hase	86	0.228242			HAase	86	0.0184454			HAase	86	0.0926489
Hase	87	0.235449			HAase	87	0.0150757			HAase	87	0.086139
Hase	88	0.250893			HAase	88	0.0133649			HAase	88	0.083668
Hase	89	0.261073			HAase	89	0.0125239			HAase	89	0.0921786
Hase	90	0.26428			HAase	90	0.0144442			HAase	90	0.101444
Hase	91	0.286697			HAase	91	0.0143071			HAase	91	0.106691
Hase	92	0.313543			HAase	92	0.015571			HAase	92	0.116968
Hase	93	0.331798			HAase	93	0.0146204			HAase	93	0.121321
Hase	94	0.348275			HAase	94	0.0147531			HAase	94	0.126061
Hase	95	0.345091			HAase	95	0.0171977			HAase	95	0.148021
Hase	96	0.326431			HAase	96	0.0183554			HAase	96	0.170705
Hase	97	0.29297			HAase	97	0.0228476			HAase	97	0.200283
Hase	98	0.319571			HAase	98	0.0243119			HAase	98	0.209267
Hase	99	0.304015			HAase	99	0.0317002			HAase	99	0.252168
Hase	100	0.201677			HAase	100	0.0470315			HAase	100	0.294251
Hase	1	0.44338			HAase	1	0.0530526			HAase	1	0.119713
Hase	2	0.371992			HAase	2	0.0565362			HAase	2	0.12236
Hase	3	0.346739			HAase	3	0.0616297			HAase	3	0.114949
Hase	4	0.360953			HAase	4	0.0638948			HAase	4	0.114157
Hase	5	0.354793			HAase	5	0.0725105			HAase	5	0.116254
Hase	6	0.339197			HAase	6	0.0640547			HAase	6	0.115879
Hase	7	0.323725			HAase	7	0.0735715			HAase	7	0.113243
Hase	8	0.32784			HAase	8	0.0699146			HAase	8	0.0985113
Hase	9	0.303098			HAase	9	0.0663481			HAase	9	0.0999278
Hase	10	0.304163			HAase	10	0.0618868			HAase	10	0.102462
Hase	11	0.281432			HAase	11	0.0573212			HAase	11	0.103254
Hase	12	0.291761			HAase	12	0.0720533			HAase	12	0.107811
Hase	13	0.281489			HAase	13	0.107113			HAase	13	0.111922
Hase	14	0.28755			HAase	14	0.0924679			HAase	14	0.113507
Hase	15	0.298953			HAase	15	0.113731			HAase	15	0.130943
Hase	16	0.346392			HAase	16	0.105606			HAase	16	0.126426
Hase	17	0.327256			HAase	17	0.0761204			HAase	17	0.106894
Hase	18	0.310861			HAase	18	0.0736424			HAase	18	0.0979035
Hase	19	0.321692			HAase	19	0.0787855			HAase	19	0.101414
Hase	20	0.297822			HAase	20	0.0748037			HAase	20	0.0974494
Hase	21	0.28586			HAase	21	0.0663463			HAase	21	0.0940957
Hase	22	0.292731			HAase	22	0.0655831			HAase	22	0.100329
Hase	23	0.30635			HAase	23	0.0625383			HAase	23	0.0997207
Hase	24	0.31158			HAase	24	0.0729154			HAase	24	0.112984
Hase	25	0.302219			HAase	25	0.080225			HAase	25	0.118192
Hase	26	0.342242			HAase	26	0.105619			HAase	26	0.132511
Hase	27	0.398461			HAase	27	0.137681			HAase	27	0.180816
Hase	28	0.449399			HAase	28	0.17719			HAase	28	0.212677
Hase	29	0.475791			HAase	29	0.322343			HAase	29	0.235283
Hase	30	0.500387			HAase	30	0.33868			HAase	30	0.252519
Hase	31	0.488038			HAase	31	0.341202			HAase	31	0.248452
Hase	32	0.443884			HAase	32	0.428109			HAase	32	0.264034
Hase	33	0.392247			HAase	33	0.485015			HAase	33	0.268689
Hase	34	0.422177			HAase	34	0.414616			HAase	34	0.233456
Hase	35	0.391992			HAase	35	0.47002			HAase	35	0.241079
Hase	36	0.33288			HAase	36	0.452705			HAase	36	0.256314
Hase	37	0.295774			HAase	37	0.458199			HAase	37	0.257637
Hase	38	0.274008			HAase	38	0.53085			HAase	38	0.26404
Hase	39	0.296288			HAase	39	0.469355			HAase	39	0.231803
Hase	40	0.301435			HAase	40	0.502884			HAase	40	0.242696
Hase	41	0.305787			HAase	41	0.542401			HAase	41	0.295531
Hase	42	0.313962			HAase	42	0.632207			HAase	42	0.374566
Hase	43	0.320673			HAase	43	0.589267			HAase	43	0.407688
Hase	44	0.33801			HAase	44	0.528682			HAase	44	0.357796
Hase	45	0.347475			HAase	45	0.596591			HAase	45	0.365724
Hase	46	0.345414			HAase	46	0.620239			HAase	46	0.344469
Hase	47	0.352731			HAase	47	0.515188			HAase	47	0.345399
Hase	48	0.34494			HAase	48	0.500539			HAase	48	0.334972
Hase	49	0.329263			HAase	49	0.500818			HAase	49	0.400495
Hase	50	0.348935			HAase	50	0.443857			HAase	50	0.326354
Hase	51	0.361071			HAase	51	0.421678			HAase	51	0.320472
Hase	52	0.353786			HAase	52	0.387692			HAase	52	0.315893
Hase	53	0.35566			HAase	53	0.34091			HAase	53	0.268986
Hase	54	0.361042			HAase	54	0.293489			HAase	54	0.275385
Hase	55	0.311636			HAase	55	0.265927			HAase	55	0.268587
Hase	56	0.291722			HAase	56	0.277297			HAase	56	0.239135
Hase	57	0.285603			HAase	57	0.237082			HAase	57	0.208761
Hase	58	0.279309			HAase	58	0.266361			HAase	58	0.204051
Hase	59	0.274048			HAase	59	0.275914			HAase	59	0.22059
Hase	60	0.271152			HAase	60	0.220817			HAase	60	0.20519
Hase	61	0.27385			HAase	61	0.191436			HAase	61	0.195019
Hase	62	0.254318			HAase	62	0.144898			HAase	62	0.18276
Hase	63	0.261564			HAase	63	0.107087			HAase	63	0.171472
Hase	64	0.264203			HAase	64	0.100046			HAase	64	0.188597
Hase	65	0.256015			HAase	65	0.0989438			HAase	65	0.176881
Hase	66	0.242368			HAase	66	0.103151			HAase	66	0.181524
Hase	67	0.234017			HAase	67	0.0739443			HAase	67	0.188126
Hase	68	0.249416			HAase	68	0.0715414			HAase	68	0.177742
Hase	69	0.239314			HAase	69	0.06616			HAase	69	0.171017
Hase	70	0.230148			HAase	70	0.0466918			HAase	70	0.144676
Hase	71	0.234293			HAase	71	0.0494512			HAase	71	0.143396
Hase	72	0.233506			HAase	72	0.041306			HAase	72	0.127837
Hase	73	0.238869			HAase	73	0.0353929			HAase	73	0.125645
Hase	74	0.230754			HAase	74	0.0343996			HAase	74	0.113229
Hase	75	0.233442			HAase	75	0.0336908			HAase	75	0.108663
Hase	76	0.235805			HAase	76	0.032525			HAase	76	0.109862
Hase	77	0.227344			HAase	77	0.0304903			HAase	77	0.10074
Hase	78	0.216334			HAase	78	0.031054			HAase	78	0.0923814
Hase	79	0.217202			HAase	79	0.0297946			HAase	79	0.0906675
Hase	80	0.216389			HAase	80	0.027924			HAase	80	0.0921517
Hase	81	0.20545			HAase	81	0.0284278			HAase	81	0.0859141
Hase	82	0.206306			HAase	82	0.0285755			HAase	82	0.0874719
Hase	83	0.205124			HAase	83	0.0310312			HAase	83	0.0887183
Hase	84	0.199588			HAase	84	0.030701			HAase	84	0.0876325
Hase	85	0.192383			HAase	85	0.0280437			HAase	85	0.0884383
Hase	86	0.190623			HAase	86	0.0248875			HAase	86	0.0854328
Hase	87	0.192438			HAase	87	0.024462			HAase	87	0.0938423
Hase	88	0.198798			HAase	88	0.0240811			HAase	88	0.0864489
Hase	89	0.197186			HAase	89	0.021452			HAase	89	0.0801138
Hase	90	0.202885			HAase	90	0.0209336			HAase	90	0.0858502
Hase	91	0.209798			HAase	91	0.0184087			HAase	91	0.085582
Hase	92	0.223004			HAase	92	0.0188678			HAase	92	0.0884332
Hase	93	0.23277			HAase	93	0.0171172			HAase	93	0.0903138
Hase	94	0.244375			HAase	94	0.0169443			HAase	94	0.0947349
Hase	95	0.250905			HAase	95	0.0133845			HAase	95	0.0931441
Hase	96	0.264569			HAase	96	0.0134293			HAase	96	0.0963984
Hase	97	0.276312			HAase	97	0.0174318			HAase	97	0.112953
Hase	98	0.306636			HAase	98	0.0182922			HAase	98	0.127
Hase	99	0.335263			HAase	99	0.0163017			HAase	99	0.129184
Hase	100	0.351521			HAase	100	0.0165135			HAase	100	0.145866
Hase	1	0.316227			HAase	1	0.0208751			HAase	1	0.0986574
Hase	2	0.300599			HAase	2	0.0202398			HAase	2	0.089568
Hase	3	0.305099			HAase	3	0.0220513			HAase	3	0.0871541
Hase	4	0.30888			HAase	4	0.020214			HAase	4	0.0789377
Hase	5	0.291734			HAase	5	0.0199737			HAase	5	0.0719259
Hase	6	0.282716			HAase	6	0.0194199			HAase	6	0.0760019
Hase	7	0.268193			HAase	7	0.0212611			HAase	7	0.0759593
Hase	8	0.271993			HAase	8	0.0244581			HAase	8	0.0784052
Hase	9	0.271647			HAase	9	0.0270623			HAase	9	0.0818783
Hase	10	0.260553			HAase	10	0.0254228			HAase	10	0.0800513
Hase	11	0.262187			HAase	11	0.0250974			HAase	11	0.0867687
Hase	12	0.257444			HAase	12	0.0235571			HAase	12	0.082851
Hase	13	0.253143			HAase	13	0.0253484			HAase	13	0.0869228
Hase	14	0.258196			HAase	14	0.0250869			HAase	14	0.0818454
Hase	15	0.253483			HAase	15	0.0255925			HAase	15	0.0756983
Hase	16	0.253526			HAase	16	0.0256885			HAase	16	0.0744086
Hase	17	0.251021			HAase	17	0.0253678			HAase	17	0.0708187
Hase	18	0.250029			HAase	18	0.0239411			HAase	18	0.0693774
Hase	19	0.2563			HAase	19	0.0234094			HAase	19	0.0764421
Hase	20	0.26234			HAase	20	0.0245213			HAase	20	0.0802495
Hase	21	0.263298			HAase	21	0.0333545			HAase	21	0.0970205
Hase	22	0.264246			HAase	22	0.0397139			HAase	22	0.116806
Hase	23	0.293172			HAase	23	0.0488566			HAase	23	0.146834
Hase	24	0.329873			HAase	24	0.0654146			HAase	24	0.199517
Hase	25	0.373939			HAase	25	0.0805757			HAase	25	0.249706
Hase	26	0.484516			HAase	26	0.0936336			HAase	26	0.284532
Hase	27	0.461247			HAase	27	0.120677			HAase	27	0.315018
Hase	28	0.446972			HAase	28	0.127149			HAase	28	0.311819
Hase	29	0.419089			HAase	29	0.148577			HAase	29	0.310682
Hase	30	0.448333			HAase	30	0.236144			HAase	30	0.314534
Hase	31	0.406586			HAase	31	0.286431			HAase	31	0.345305
Hase	32	0.344174			HAase	32	0.29201			HAase	32	0.383949
Hase	33	0.31412			HAase	33	0.365773			HAase	33	0.357288
Hase	34	0.291878			HAase	34	0.447075			HAase	34	0.366758
Hase	35	0.254913			HAase	35	0.477251			HAase	35	0.37702
Hase	36	0.239642			HAase	36	0.526761			HAase	36	0.373745
Hase	37	0.232083			HAase	37	0.524751			HAase	37	0.410099
Hase	38	0.242177			HAase	38	0.539461			HAase	38	0.44941
Hase	39	0.248013			HAase	39	0.53567			HAase	39	0.54226
Hase	40	0.264901			HAase	40	0.575324			HAase	40	0.563458
Hase	41	0.260256			HAase	41	0.536359			HAase	41	0.583858
Hase	42	0.271059			HAase	42	0.552005			HAase	42	0.605297
Hase	43	0.296022			HAase	43	0.530949			HAase	43	0.629532
Hase	44	0.30789			HAase	44	0.516506			HAase	44	0.661634
Hase	45	0.29763			HAase	45	0.485389			HAase	45	0.615248
Hase	46	0.30614			HAase	46	0.448849			HAase	46	0.611327
Hase	47	0.297349			HAase	47	0.512569			HAase	47	0.79206
Hase	48	0.321221			HAase	48	0.458863			HAase	48	0.768601
Hase	49	0.345961			HAase	49	0.375858			HAase	49	0.702644
Hase	50	0.327029			HAase	50	0.339347			HAase	50	0.586972
Hase	51	0.329312			HAase	51	0.28289			HAase	51	0.496962
Hase	52	0.320354			HAase	52	0.249467			HAase	52	0.467772
Hase	53	0.293657			HAase	53	0.188201			HAase	53	0.367535
Hase	54	0.289694			HAase	54	0.15855			HAase	54	0.320067
Hase	55	0.296405			HAase	55	0.154257			HAase	55	0.3059
Hase	56	0.290143			HAase	56	0.140081			HAase	56	0.267299
Hase	57	0.293282			HAase	57	0.126306			HAase	57	0.285676
Hase	58	0.297372			HAase	58	0.111106			HAase	58	0.256977
Hase	59	0.28634			HAase	59	0.0903797			HAase	59	0.247106
Hase	60	0.289871			HAase	60	0.0721649			HAase	60	0.224207
Hase	61	0.283652			HAase	61	0.0560188			HAase	61	0.211455
Hase	62	0.279747			HAase	62	0.046453			HAase	62	0.187758
Hase	63	0.284398			HAase	63	0.0439805			HAase	63	0.170436
Hase	64	0.274565			HAase	64	0.0458089			HAase	64	0.163617
Hase	65	0.277458			HAase	65	0.0391784			HAase	65	0.148308
Hase	66	0.277424			HAase	66	0.0358071			HAase	66	0.134678
Hase	67	0.268704			HAase	67	0.0300505			HAase	67	0.12748
Hase	68	0.269793			HAase	68	0.0272471			HAase	68	0.115939
Hase	69	0.252548			HAase	69	0.0261382			HAase	69	0.0997703
Hase	70	0.255985			HAase	70	0.0234607			HAase	70	0.0954308
Hase	71	0.245304			HAase	71	0.0220978			HAase	71	0.0883929
Hase	72	0.245776			HAase	72	0.0213627			HAase	72	0.0809274
Hase	73	0.237575			HAase	73	0.0233758			HAase	73	0.0810154
Hase	74	0.232487			HAase	74	0.0211264			HAase	74	0.0752846
Hase	75	0.225734			HAase	75	0.0203358			HAase	75	0.0708784
Hase	76	0.22922			HAase	76	0.0198844			HAase	76	0.0762996
Hase	77	0.227451			HAase	77	0.019671			HAase	77	0.0691882
Hase	78	0.212937			HAase	78	0.0185037			HAase	78	0.0655261
Hase	79	0.221126			HAase	79	0.0186369			HAase	79	0.0700123
Hase	80	0.214553			HAase	80	0.0175026			HAase	80	0.0710501
Hase	81	0.213677			HAase	81	0.0167417			HAase	81	0.0680433
Hase	82	0.211788			HAase	82	0.0168231			HAase	82	0.0716926
Hase	83	0.211881			HAase	83	0.0159384			HAase	83	0.0701473
Hase	84	0.219079			HAase	84	0.0154268			HAase	84	0.0670491
Hase	85	0.218764			HAase	85	0.0153898			HAase	85	0.0647116
Hase	86	0.224337			HAase	86	0.0137869			HAase	86	0.0633431
Hase	87	0.228097			HAase	87	0.0112306			HAase	87	0.0575059
Hase	88	0.225899			HAase	88	0.0114705			HAase	88	0.0590071
Hase	89	0.229815			HAase	89	0.00940209			HAase	89	0.0600105
Hase	90	0.239251			HAase	90	0.00895676			HAase	90	0.0652535
Hase	91	0.238196			HAase	91	0.00820167			HAase	91	0.0679779
Hase	92	0.258223			HAase	92	0.00794618			HAase	92	0.0771553
Hase	93	0.276565			HAase	93	0.00752523			HAase	93	0.0702311
Hase	94	0.287744			HAase	94	0.00646885			HAase	94	0.0790877
Hase	95	0.308349			HAase	95	0.0092654			HAase	95	0.0851309
Hase	96	0.32276			HAase	96	0.0149317			HAase	96	0.116907
Hase	97	0.342277			HAase	97	0.0223876			HAase	97	0.144041
Hase	98	0.370693			HAase	98	0.0380777			HAase	98	0.190257
Hase	99	0.347152			HAase	99	0.0900691			HAase	99	0.27638
Hase	100	0.273145			HAase	100	0.12003			HAase	100	0.413105
Hase	1	0.399721			HAase	1	0.0308854			HAase	1	0.130614
Hase	2	0.376138			HAase	2	0.0276572			HAase	2	0.107831
Hase	3	0.372949			HAase	3	0.0286505			HAase	3	0.102839
Hase	4	0.378214			HAase	4	0.030386			HAase	4	0.107223
Hase	5	0.352212			HAase	5	0.0354068			HAase	5	0.114473
Hase	6	0.342751			HAase	6	0.0357394			HAase	6	0.11383
Hase	7	0.341798			HAase	7	0.0315596			HAase	7	0.107288
Hase	8	0.346404			HAase	8	0.0326736			HAase	8	0.100365
Hase	9	0.369684			HAase	9	0.0358356			HAase	9	0.0993573
Hase	10	0.36612			HAase	10	0.0333569			HAase	10	0.104349
Hase	11	0.366106			HAase	11	0.036468			HAase	11	0.0973654
Hase	12	0.361769			HAase	12	0.0386095			HAase	12	0.101479
Hase	13	0.347704			HAase	13	0.0347493			HAase	13	0.101219
Hase	14	0.354268			HAase	14	0.0326809			HAase	14	0.10261
Hase	15	0.334493			HAase	15	0.0313015			HAase	15	0.102487
Hase	16	0.315447			HAase	16	0.0343578			HAase	16	0.0994938
Hase	17	0.306739			HAase	17	0.0361644			HAase	17	0.0982746
Hase	18	0.296969			HAase	18	0.0315653			HAase	18	0.0928033
Hase	19	0.286962			HAase	19	0.0313717			HAase	19	0.0960276
Hase	20	0.288708			HAase	20	0.0333606			HAase	20	0.0963906
Hase	21	0.290843			HAase	21	0.0301101			HAase	21	0.0999648
Hase	22	0.285519			HAase	22	0.0305738			HAase	22	0.103191
Hase	23	0.286177			HAase	23	0.0316023			HAase	23	0.11468
Hase	24	0.2907			HAase	24	0.0421482			HAase	24	0.138814
Hase	25	0.316704			HAase	25	0.0618255			HAase	25	0.182545
Hase	26	0.351551			HAase	26	0.0795574			HAase	26	0.253347
Hase	27	0.373337			HAase	27	0.115756			HAase	27	0.348018
Hase	28	0.357255			HAase	28	0.189154			HAase	28	0.37456
Hase	29	0.36749			HAase	29	0.286621			HAase	29	0.357006
Hase	30	0.382248			HAase	30	0.303253			HAase	30	0.313138
Hase	31	0.392423			HAase	31	0.247488			HAase	31	0.295004
Hase	32	0.372063			HAase	32	0.273312			HAase	32	0.350601
Hase	33	0.378459			HAase	33	0.276149			HAase	33	0.309354
Hase	34	0.361238			HAase	34	0.275477			HAase	34	0.329865
Hase	35	0.354504			HAase	35	0.284722			HAase	35	0.31523
Hase	36	0.331377			HAase	36	0.272784			HAase	36	0.301267
Hase	37	0.311827			HAase	37	0.283772			HAase	37	0.302852
Hase	38	0.315481			HAase	38	0.265222			HAase	38	0.292389
Hase	39	0.312848			HAase	39	0.269223			HAase	39	0.315683
Hase	40	0.292787			HAase	40	0.332853			HAase	40	0.3661
Hase	41	0.294944			HAase	41	0.323263			HAase	41	0.36982
Hase	42	0.285907			HAase	42	0.335377			HAase	42	0.365307
Hase	43	0.286869			HAase	43	0.330312			HAase	43	0.38177
Hase	44	0.284405			HAase	44	0.340359			HAase	44	0.43044
Hase	45	0.300119			HAase	45	0.342339			HAase	45	0.428282
Hase	46	0.31484			HAase	46	0.324535			HAase	46	0.455612
Hase	47	0.321961			HAase	47	0.331417			HAase	47	0.45365
Hase	48	0.332137			HAase	48	0.301254			HAase	48	0.455655
Hase	49	0.346843			HAase	49	0.299719			HAase	49	0.376668
Hase	50	0.342298			HAase	50	0.247148			HAase	50	0.332977
Hase	51	0.340456			HAase	51	0.227061			HAase	51	0.294858
Hase	52	0.332752			HAase	52	0.229782			HAase	52	0.288399
Hase	53	0.323437			HAase	53	0.243657			HAase	53	0.292675
Hase	54	0.293467			HAase	54	0.224859			HAase	54	0.271767
Hase	55	0.263397			HAase	55	0.168309			HAase	55	0.265235
Hase	56	0.248318			HAase	56	0.143376			HAase	56	0.257956
Hase	57	0.239694			HAase	57	0.153017			HAase	57	0.260102
Hase	58	0.247069			HAase	58	0.137735			HAase	58	0.269042
Hase	59	0.243247			HAase	59	0.130355			HAase	59	0.264318
Hase	60	0.231614			HAase	60	0.11473			HAase	60	0.258703
Hase	61	0.235324			HAase	61	0.110057			HAase	61	0.2553
Hase	62	0.236716			HAase	62	0.106928			HAase	62	0.256647
Hase	63	0.233501			HAase	63	0.0892533			HAase	63	0.245149
Hase	64	0.234337			HAase	64	0.0771147			HAase	64	0.21988
Hase	65	0.240221			HAase	65	0.0792165			HAase	65	0.214193
Hase	66	0.241787			HAase	66	0.0668196			HAase	66	0.217446
Hase	67	0.240386			HAase	67	0.0578032			HAase	67	0.208805
Hase	68	0.241466			HAase	68	0.0505593			HAase	68	0.214734
Hase	69	0.237661			HAase	69	0.0475636			HAase	69	0.186942
Hase	70	0.237756			HAase	70	0.0449784			HAase	70	0.183848
Hase	71	0.229899			HAase	71	0.0404308			HAase	71	0.187263
Hase	72	0.233915			HAase	72	0.0373278			HAase	72	0.169454
Hase	73	0.235678			HAase	73	0.0333087			HAase	73	0.160862
Hase	74	0.232202			HAase	74	0.0267097			HAase	74	0.152915
Hase	75	0.237354			HAase	75	0.0239152			HAase	75	0.129126
Hase	76	0.234843			HAase	76	0.019719			HAase	76	0.116383
Hase	77	0.231215			HAase	77	0.0174398			HAase	77	0.111123
Hase	78	0.227806			HAase	78	0.0178233			HAase	78	0.102236
Hase	79	0.227688			HAase	79	0.0176726			HAase	79	0.102892
Hase	80	0.23826			HAase	80	0.0175468			HAase	80	0.0996305
Hase	81	0.241095			HAase	81	0.0134584			HAase	81	0.0973469
Hase	82	0.246352			HAase	82	0.0141189			HAase	82	0.100018
Hase	83	0.248351			HAase	83	0.0143223			HAase	83	0.101426
Hase	84	0.255726			HAase	84	0.0153676			HAase	84	0.0973722
Hase	85	0.250238			HAase	85	0.0187856			HAase	85	0.109814
Hase	86	0.265176			HAase	86	0.0196894			HAase	86	0.118214
Hase	87	0.273791			HAase	87	0.015375			HAase	87	0.113694
Hase	88	0.287839			HAase	88	0.0105584			HAase	88	0.109692
Hase	89	0.296007			HAase	89	0.0108026			HAase	89	0.114484
Hase	90	0.307206			HAase	90	0.011681			HAase	90	0.115982
Hase	91	0.325074			HAase	91	0.00781731			HAase	91	0.108086
Hase	92	0.339148			HAase	92	0.00875196			HAase	92	0.117453
Hase	93	0.345274			HAase	93	0.00930871			HAase	93	0.130199
Hase	94	0.366638			HAase	94	0.00853011			HAase	94	0.143792
Hase	95	0.395966			HAase	95	0.00851543			HAase	95	0.146706
Hase	96	0.417989			HAase	96	0.0105212			HAase	96	0.173669
Hase	97	0.39303			HAase	97	0.014267			HAase	97	0.207511
Hase	98	0.351264			HAase	98	0.0215808			HAase	98	0.291716
Hase	99	0.335208			HAase	99	0.0580209			HAase	99	0.616943
Hase	100	0.337693			HAase	100	0.214476			HAase	100	1.34685
Hase	1	0.352125			HAase	1	0.211262			HAase	1	0.192805
Hase	2	0.334033			HAase	2	0.176057			HAase	2	0.206521
Hase	3	0.318595			HAase	3	0.132131			HAase	3	0.195239
Hase	4	0.329428			HAase	4	0.153603			HAase	4	0.181968
Hase	5	0.34262			HAase	5	0.138316			HAase	5	0.185866
Hase	6	0.320737			HAase	6	0.1283			HAase	6	0.182822
Hase	7	0.32979			HAase	7	0.146117			HAase	7	0.156214
Hase	8	0.327963			HAase	8	0.187919			HAase	8	0.158536
Hase	9	0.326036			HAase	9	0.17044			HAase	9	0.138603
Hase	10	0.321003			HAase	10	0.152851			HAase	10	0.140887
Hase	11	0.319067			HAase	11	0.159506			HAase	11	0.140387
Hase	12	0.30949			HAase	12	0.185781			HAase	12	0.132313
Hase	13	0.301721			HAase	13	0.174326			HAase	13	0.118126
Hase	14	0.306638			HAase	14	0.145275			HAase	14	0.124803
Hase	15	0.302584			HAase	15	0.139822			HAase	15	0.141257
Hase	16	0.300649			HAase	16	0.159576			HAase	16	0.121214
Hase	17	0.297593			HAase	17	0.192761			HAase	17	0.119702
Hase	18	0.299068			HAase	18	0.146611			HAase	18	0.108081
Hase	19	0.285629			HAase	19	0.17142			HAase	19	0.0945922
Hase	20	0.284502			HAase	20	0.144975			HAase	20	0.0974735
Hase	21	0.291408			HAase	21	0.160736			HAase	21	0.103601
Hase	22	0.28611			HAase	22	0.14382			HAase	22	0.112741
Hase	23	0.275779			HAase	23	0.138099			HAase	23	0.119178
Hase	24	0.264315			HAase	24	0.133599			HAase	24	0.116861
Hase	25	0.261622			HAase	25	0.129567			HAase	25	0.12505
Hase	26	0.266947			HAase	26	0.14091			HAase	26	0.12928
Hase	27	0.261489			HAase	27	0.119407			HAase	27	0.127263
Hase	28	0.272008			HAase	28	0.123106			HAase	28	0.152305
Hase	29	0.274432			HAase	29	0.1652			HAase	29	0.20966
Hase	30	0.287819			HAase	30	0.182248			HAase	30	0.234476
Hase	31	0.321893			HAase	31	0.194654			HAase	31	0.215372
Hase	32	0.33525			HAase	32	0.220029			HAase	32	0.204811
Hase	33	0.29477			HAase	33	0.208443			HAase	33	0.181735
Hase	34	0.290399			HAase	34	0.202813			HAase	34	0.191177
Hase	35	0.271859			HAase	35	0.196497			HAase	35	0.175869
Hase	36	0.26214			HAase	36	0.216133			HAase	36	0.17177
Hase	37	0.259827			HAase	37	0.234194			HAase	37	0.172034
Hase	38	0.235816			HAase	38	0.302579			HAase	38	0.192316
Hase	39	0.23368			HAase	39	0.310393			HAase	39	0.199571
Hase	40	0.233037			HAase	40	0.354143			HAase	40	0.234524
Hase	41	0.223085			HAase	41	0.315324			HAase	41	0.248043
Hase	42	0.227646			HAase	42	0.37908			HAase	42	0.254596
Hase	43	0.216707			HAase	43	0.395908			HAase	43	0.294104
Hase	44	0.222867			HAase	44	0.329259			HAase	44	0.368745
Hase	45	0.233088			HAase	45	0.260497			HAase	45	0.329438
Hase	46	0.239005			HAase	46	0.295743			HAase	46	0.284904
Hase	47	0.240235			HAase	47	0.336488			HAase	47	0.321317
Hase	48	0.245875			HAase	48	0.272584			HAase	48	0.311576
Hase	49	0.238487			HAase	49	0.272187			HAase	49	0.334838
Hase	50	0.236244			HAase	50	0.262432			HAase	50	0.287547
Hase	51	0.223394			HAase	51	0.302399			HAase	51	0.276836
Hase	52	0.237079			HAase	52	0.248178			HAase	52	0.253729
Hase	53	0.233847			HAase	53	0.233148			HAase	53	0.259905
Hase	54	0.237261			HAase	54	0.228699			HAase	54	0.251879
Hase	55	0.240184			HAase	55	0.208725			HAase	55	0.203197
Hase	56	0.251463			HAase	56	0.194874			HAase	56	0.189618
Hase	57	0.248055			HAase	57	0.181773			HAase	57	0.19521
Hase	58	0.239079			HAase	58	0.204104			HAase	58	0.234313
Hase	59	0.242603			HAase	59	0.176137			HAase	59	0.195956
Hase	60	0.231569			HAase	60	0.134611			HAase	60	0.162183
Hase	61	0.229482			HAase	61	0.122824			HAase	61	0.145513
Hase	62	0.232717			HAase	62	0.136158			HAase	62	0.148064
Hase	63	0.23988			HAase	63	0.111597			HAase	63	0.14488
Hase	64	0.234371			HAase	64	0.104094			HAase	64	0.153591
Hase	65	0.233889			HAase	65	0.110721			HAase	65	0.138398
Hase	66	0.230618			HAase	66	0.0876517			HAase	66	0.147257
Hase	67	0.234798			HAase	67	0.0791651			HAase	67	0.147129
Hase	68	0.236328			HAase	68	0.0739809			HAase	68	0.155535
Hase	69	0.234507			HAase	69	0.0629802			HAase	69	0.153951
Hase	70	0.233644			HAase	70	0.0502851			HAase	70	0.13616
Hase	71	0.233366			HAase	71	0.0368639			HAase	71	0.120666
Hase	72	0.233699			HAase	72	0.0340864			HAase	72	0.121819
Hase	73	0.239602			HAase	73	0.0275166			HAase	73	0.115835
Hase	74	0.243185			HAase	74	0.0252716			HAase	74	0.102047
Hase	75	0.242395			HAase	75	0.0283854			HAase	75	0.101866
Hase	76	0.242361			HAase	76	0.0248172			HAase	76	0.0994672
Hase	77	0.246029			HAase	77	0.0215555			HAase	77	0.0959151
Hase	78	0.244175			HAase	78	0.0217441			HAase	78	0.0888457
Hase	79	0.244239			HAase	79	0.0224191			HAase	79	0.0826175
Hase	80	0.252317			HAase	80	0.0235734			HAase	80	0.0918217
Hase	81	0.241897			HAase	81	0.0218411			HAase	81	0.0866928
Hase	82	0.238596			HAase	82	0.0180512			HAase	82	0.0780792
Hase	83	0.239045			HAase	83	0.0187652			HAase	83	0.0859409
Hase	84	0.234135			HAase	84	0.0160466			HAase	84	0.0832997
Hase	85	0.248755			HAase	85	0.0162905			HAase	85	0.0832557
Hase	86	0.242369			HAase	86	0.0184603			HAase	86	0.0994908
Hase	87	0.239051			HAase	87	0.0194709			HAase	87	0.098041
Hase	88	0.242082			HAase	88	0.0160542			HAase	88	0.101694
Hase	89	0.246256			HAase	89	0.0157344			HAase	89	0.117565
Hase	90	0.269473			HAase	90	0.0148415			HAase	90	0.119442
Hase	91	0.279157			HAase	91	0.0124001			HAase	91	0.118205
Hase	92	0.302339			HAase	92	0.0125295			HAase	92	0.122123
Hase	93	0.312534			HAase	93	0.0152651			HAase	93	0.143845
Hase	94	0.35075			HAase	94	0.0112876			HAase	94	0.157415
Hase	95	0.350489			HAase	95	0.0157914			HAase	95	0.177784
Hase	96	0.34486			HAase	96	0.0183667			HAase	96	0.224189
Hase	97	0.344365			HAase	97	0.0202452			HAase	97	0.251748
Hase	98	0.357022			HAase	98	0.0234073			HAase	98	0.275266
Hase	99	0.371565			HAase	99	0.033177			HAase	99	0.381638
Hase	100	0.383353			HAase	100	0.065281			HAase	100	0.66342

## Sheet: Fig8 c
NCAN					TNC
Type	Intensity				Type	Intensity
PBS	1.0524				PBS	0.940811
PBS	1.07042				PBS	1.29359
PBS	1.08138				PBS	0.894209
PBS	0.795808				PBS	0.871389
Hase	0.549402				Hase	0.482143
Hase	0.664352				Hase	0.536953
Hase	0.64055				Hase	0.527794
Hase	0.670693				Hase	0.691465

## Sheet: Fig8 d
Type	Bin	% of FT+ cells
PBS	1	20.4861
PBS	2	29.5139
PBS	3	30.2083
PBS	4	14.5833
PBS	5	5.20833
PBS	1	2.88066
PBS	2	17.6955
PBS	3	39.0947
PBS	4	19.7531
PBS	5	20.5761
PBS	1	20.7547
PBS	2	24.0566
PBS	3	21.6981
PBS	4	19.3396
PBS	5	14.1509
PBS	1	1.25786
PBS	2	18.239
PBS	3	49.0566
PBS	4	23.2704
PBS	5	8.1761
PBS	1	13.5965
PBS	2	21.4912
PBS	3	21.4912
PBS	4	23.2456
PBS	5	20.1754
PBS	1	1.89573
PBS	2	17.5355
PBS	3	33.1754
PBS	4	23.6967
PBS	5	23.6967
PBS	1	6.94981
PBS	2	30.888
PBS	3	29.3436
PBS	4	14.2857
PBS	5	18.5328
PBS	1	5.90909
PBS	2	23.6364
PBS	3	30
PBS	4	25.4545
PBS	5	15
PBS	1	5.04202
PBS	2	21.4286
PBS	3	29.4118
PBS	4	20.1681
PBS	5	23.9496
HAase	1	3.44828
HAase	2	21.4559
HAase	3	39.4636
HAase	4	21.0728
HAase	5	14.5594
HAase	1	2.38095
HAase	2	19.8413
HAase	3	36.1111
HAase	4	18.254
HAase	5	23.4127
HAase	1	4.63576
HAase	2	25.1656
HAase	3	47.0199
HAase	4	11.2583
HAase	5	11.9205
HAase	1	0
HAase	2	19.9074
HAase	3	41.6667
HAase	4	21.2963
HAase	5	17.1296
HAase	1	0
HAase	2	16.7598
HAase	3	38.5475
HAase	4	30.7263
HAase	5	13.9665
HAase	1	5.42986
HAase	2	24.4344
HAase	3	28.5068
HAase	4	19.0045
HAase	5	22.6244
HAase	1	0.429185
HAase	2	16.309
HAase	3	34.7639
HAase	4	24.8927
HAase	5	23.6052
HAase	1	8.20896
HAase	2	26.8657
HAase	3	36.194
HAase	4	16.791
HAase	5	11.9403
HAase	1	2.7907
HAase	2	20
HAase	3	40.9302
HAase	4	17.6744
HAase	5	18.6047
HAase	1	2.62009
HAase	2	15.7205
HAase	3	37.5546
HAase	4	20.9607
HAase	5	23.1441

## Sheet: Fig8 e
Type	Bin	% of FT+ cells
PBS	1	39.0977
PBS	2	14.2857
PBS	3	18.797
PBS	4	21.0526
PBS	5	6.76692
PBS	1	39.2593
PBS	2	25.9259
PBS	3	17.7778
PBS	4	9.62963
PBS	5	7.40741
PBS	1	40.708
PBS	2	10.6195
PBS	3	30.9735
PBS	4	15.9292
PBS	5	1.76991
PBS	1	39.3258
PBS	2	26.9663
PBS	3	10.1124
PBS	4	19.1011
PBS	5	4.49438
PBS	1	40.411
PBS	2	14.3836
PBS	3	17.1233
PBS	4	21.9178
PBS	5	6.16438
PBS	1	35.7576
PBS	2	17.5758
PBS	3	11.5152
PBS	4	21.8182
PBS	5	13.3333
PBS	1	52.349
PBS	2	7.38255
PBS	3	9.39597
PBS	4	25.5034
PBS	5	5.36913
PBS	1	40.2778
PBS	2	5.55556
PBS	3	9.72222
PBS	4	27.0833
PBS	5	17.3611
PBS	1	34.9112
PBS	2	4.73373
PBS	3	15.9763
PBS	4	25.4438
PBS	5	18.9349
HAase	1	23.0126
HAase	2	30.5439
HAase	3	21.7573
HAase	4	14.6444
HAase	5	10.0418
HAase	1	28.9655
HAase	2	21.3793
HAase	3	17.931
HAase	4	20
HAase	5	11.7241
HAase	1	44.0367
HAase	2	26.6055
HAase	3	12.844
HAase	4	10.0917
HAase	5	6.42202
HAase	1	37.6
HAase	2	30.4
HAase	3	8
HAase	4	15.2
HAase	5	8.8
HAase	1	23.8095
HAase	2	27.2109
HAase	3	21.0884
HAase	4	14.2857
HAase	5	13.6054
HAase	1	36.7089
HAase	2	12.0253
HAase	3	10.1266
HAase	4	24.6835
HAase	5	16.4557
HAase	1	36.0248
HAase	2	29.8137
HAase	3	11.8012
HAase	4	17.3913
HAase	5	4.96894
HAase	1	36.7742
HAase	2	23.871
HAase	3	10.9677
HAase	4	16.129
HAase	5	12.2581
HAase	1	41.7178
HAase	2	15.9509
HAase	3	9.81595
HAase	4	20.8589
HAase	5	11.6564
HAase	1	40.6091
HAase	2	11.6751
HAase	3	16.2437
HAase	4	20.8122
HAase	5	10.6599
