# Supplementary material for: Assembly of neuron- and radial glial-cell-derived extracellular matrix molecules promotes radial migration of developing cortical neurons
Source: eLife journal article supplement (doi:10.7554/elife.92342), 2023-11-09
Supplement: fig9-data1 [file Numerical source data for Figure 9.xlsx]

## Sheet: Fig9 d
Type	Length/width ratio
WT	2.40175
WT	8.50195
WT	6.66351
WT	5.43864
WT	5.66723
WT	6.6299
WT	2.87301
WT	2.8601
WT	5.00061
WT	4.6681
WT	2.66274
WT	1.64936
WT	3.5
WT	3.02507
WT	2.8375
WT	1.78641
WT	1.84527
WT	1.56722
WT	2.26453
WT	2.56403
WT	6.14259
WT	6.7938
WT	3.40369
WT	5.33833
WT	3.91956
WT	2.57292
WT	2.95233
WT	1.7207
WT	4.36208
WT	2.03729
WT	3.4753
WT	3.8735
WT	4.04963
WT	1.87002
WT	4.00187
WT	3.64454
WT	4.21777
WT	4.64804
WT	4.83738
WT	1.45739
WT	1.587
WT	1.61243
WT	2.05945
WT	1.59525
WT	7.538
WT	4.02782
WT	3.3448
WT	7.96685
WT	5.64288
WT	1.31286
WT	4.67028
WT	6.36805
WT	3.75472
WT	2.73534
WT	1.80565
WT	4.66473
WT	3.04466
WT	2.57564
WT	3.57143
WT	4.92832
WT	1.70761
WT	1.70982
WT	2.47969
WT	2.10995
WT	2.32072
WT	3.5468
WT	1.33367
WT	3.1742
WT	4.25314
WT	6.13405
WT	5.75722
WT	7.44213
WT	5.65063
WT	1.5995
WT	2.74549
WT	4.14946
WT	3.43157
WT	4.67621
WT	6.15368
WT	6.77098
WT	2.2404
WT	5.27263
WT	2.28906
WT	3.22101
WT	1.97703
WT	2.79677
WT	3.60166
WT	6.70297
WT	5.30305
WT	13.1206
WT	4.3766
WT	5.72846
WT	3.81042
WT	6.40285
WT	4.27765
WT	3.27785
WT	5.28288
WT	3.45593
WT	3.75583
WT	2.7519
WT	2.41806
WT	2.2849
WT	1.47157
WT	1.72288
WT	1.69299
WT	1.7328
WT	2.53761
WT	2.81773
WT	1.5022
WT	3.54857
WT	7.29645
WT	5.36443
WT	7.95689
WT	2.05431
WT	4.3606
WT	4.96863
WT	3.48639
WT	9.32342
WT	4.17693
WT	4.08105
WT	2.67375
WT	3.46377
WT	1.8042
WT	2.45981
WT	1.57908
WT	2.08119
WT	2.03099
WT	1.58788
DKO	6.23382
DKO	5.21122
DKO	7.05106
DKO	3.56772
DKO	4.1984
DKO	3.13659
DKO	3.29801
DKO	3.77269
DKO	3.03496
DKO	2.90632
DKO	2.7568
DKO	1.9746
DKO	3.65434
DKO	3.02207
DKO	4.43739
DKO	4.58983
DKO	1.60256
DKO	3.19919
DKO	3.15385
DKO	2.75704
DKO	3.37842
DKO	1.92152
DKO	2.79689
DKO	2.16651
DKO	1.57657
DKO	2.99039
DKO	3.95702
DKO	6.64547
DKO	8.08335
DKO	5.81173
DKO	2.61207
DKO	6.53855
DKO	4.59478
DKO	3.05042
DKO	4.68944
DKO	1.17846
DKO	3.08808
DKO	5.52185
DKO	3.22501
DKO	4.26402
DKO	1.90395
DKO	2.41318
DKO	2.70339
DKO	2.65375
DKO	1.83865
DKO	2.19342
DKO	3.73227
DKO	1.66912
DKO	4.10815
DKO	3.5714
DKO	1.95477
DKO	4.84224
DKO	4.48933
DKO	3.71988
DKO	4.71945
DKO	3.6395
DKO	3.88095
DKO	3.8448
DKO	4.28923
DKO	2.64651
DKO	2.6219
DKO	1.41226
DKO	1.7722
DKO	1.78809
DKO	1.82953
DKO	2.28395
DKO	2.52054
DKO	2.15897
DKO	5.18457
DKO	3.14407
DKO	3.26347
DKO	6.87748
DKO	3.7997
DKO	3.22346
DKO	3.51292
DKO	2.12209
DKO	2.2377
DKO	2.21593
DKO	2.4109
DKO	2.47258
DKO	1.9765
DKO	1.80402
DKO	2.29393
DKO	1.54223
DKO	1.85799
DKO	2.12539
DKO	1.72401
DKO	2.92844
DKO	1.53536
DKO	1.98614
DKO	1.90257
DKO	2.27865
DKO	2.22127
DKO	2.66932
DKO	6.93718
DKO	2.57534
DKO	1.45948
DKO	5.14775
DKO	1.40629
DKO	3.09172
DKO	1.90579
DKO	2.17246
DKO	1.40131
DKO	2.24586
DKO	2.30384
DKO	1.83211
DKO	2.42292
DKO	3.77177
DKO	2.51611
DKO	3.21145
DKO	1.87557
DKO	2.72083
DKO	4.41929
DKO	4.6388
DKO	1.51855
DKO	4.04621
DKO	4.01125
DKO	5.35046
DKO	2.2506
DKO	4.12674
DKO	2.3285
DKO	2.84582
DKO	1.93054
DKO	2.9352
DKO	2.09904
DKO	2.12714
DKO	1.88392
DKO	1.76587
DKO	1.95022
DKO	3.02469
DKO	2.32375
DKO	2.41557

## Sheet: Fig9 e
Type	Angle of major neurites
WT	68.629
WT	86.97
WT	85.176
WT	76.99
WT	79.533
WT	73.97
WT	77.035
WT	62.049
WT	87.79
WT	79.032
WT	74.973
WT	75.446
WT	14.621
WT	83.46
WT	54.033
WT	51.78
WT	50.389
WT	61.02
WT	54.224
WT	71.94
WT	86.276
WT	89.009
WT	55.777
WT	56.821
WT	78.207
WT	67.782
WT	75.129
WT	64.867
WT	87.912
WT	62.723
WT	57.529
WT	72.876
WT	54.23
WT	71.295
WT	75.152
WT	71.634
WT	69.183
WT	78.098
WT	68.385
WT	38.313
WT	69.775
WT	48.18
WT	26.369
WT	24.624
WT	88.848
WT	74.604
WT	61.587
WT	64.835
WT	84.022
WT	47.231
WT	77.071
WT	74.55
WT	70.677
WT	57.216
WT	74.836
WT	76.551
WT	75
WT	79.599
WT	66.371
WT	75.165
WT	54.958
WT	57.758
WT	31.95
WT	24.891
WT	61.274
WT	15.88
WT	87.221
WT	89.591
WT	75.727
WT	58.209
WT	77.356
WT	70.641
WT	58.591
WT	51.746
WT	74.11
WT	58.036
WT	68.199
WT	76.853
WT	85.684
WT	79.992
WT	65.095
WT	84.742
WT	64.274
WT	70.75
WT	39.472
WT	86.468
WT	82.926
WT	78.17
WT	83.326
WT	89.588
WT	84.904
WT	73.999
WT	72.395
WT	64.225
WT	69.677
WT	77.4
WT	79.359
WT	88.819
WT	79.16
WT	50.389
WT	37.304
WT	63.646
WT	69.955
WT	37.304
WT	34.854
WT	71.372
WT	39.251
WT	58.456
WT	88.238
WT	89.157
WT	83.684
WT	76.446
WT	82.822
WT	64.123
WT	64.626
WT	74.219
WT	30.964
WT	65.466
WT	80.8
WT	74.745
WT	77.074
WT	72.897
WT	58.601
WT	44.128
WT	58.761
WT	54.345
WT	60.255
WT	61.928
DKO	86.532
DKO	84.386
DKO	73.583
DKO	70.463
DKO	87.859
DKO	69.128
DKO	45.444
DKO	88.426
DKO	74.516
DKO	60.21
DKO	53.057
DKO	49.128
DKO	56.43
DKO	48.151
DKO	55.631
DKO	75.522
DKO	34.461
DKO	66.46
DKO	55.176
DKO	54.52
DKO	46.146
DKO	42.614
DKO	75.964
DKO	50.659
DKO	66.529
DKO	83.774
DKO	89.076
DKO	88.46
DKO	69.37
DKO	89.045
DKO	84.289
DKO	64.016
DKO	66.644
DKO	46.736
DKO	66.485
DKO	14.25
DKO	83.571
DKO	71.154
DKO	59.676
DKO	65.674
DKO	66.961
DKO	51.953
DKO	67.891
DKO	29.476
DKO	25.56
DKO	54.782
DKO	81.933
DKO	66.615
DKO	59.1
DKO	80.293
DKO	28.56
DKO	39.382
DKO	84.611
DKO	75.24
DKO	86.244
DKO	78.69
DKO	68.629
DKO	73.124
DKO	67.126
DKO	89.016
DKO	85.156
DKO	63.886
DKO	42.274
DKO	71.378
DKO	16.209
DKO	69.864
DKO	73.791
DKO	17.835
DKO	11.434
DKO	89.474
DKO	59.036
DKO	70.731
DKO	72.862
DKO	58.815
DKO	62.745
DKO	75.041
DKO	63.672
DKO	43.983
DKO	16.521
DKO	84.094
DKO	56.976
DKO	42.955
DKO	35.293
DKO	7.943
DKO	64.767
DKO	10.305
DKO	18.864
DKO	31.938
DKO	24.228
DKO	51.499
DKO	9.462
DKO	57.232
DKO	76.075
DKO	27.108
DKO	34.756
DKO	52.716
DKO	69.495
DKO	78.959
DKO	66.903
DKO	65.913
DKO	83.157
DKO	14.534
DKO	62.003
DKO	65.973
DKO	76.961
DKO	41.424
DKO	47.406
DKO	39.971
DKO	42.138
DKO	37.117
DKO	48.366
DKO	24.677
DKO	45.929
DKO	68.085
DKO	58.96
DKO	44.534
DKO	67.602
DKO	71.131
DKO	88.394
DKO	69.507
DKO	53.696
DKO	24.744
DKO	66.003
DKO	62.021
DKO	52.07
DKO	21.801
DKO	49.538
DKO	60.333
DKO	31.931
DKO	19.477
DKO	32.735
DKO	50.631
DKO	59.436

## Sheet: Fig9 f
Type	Bipolar neuron
WT	40
WT	33.3333
WT	39.1304
WT	50
WT	45.4545
WT	42.1053
DKO	32
DKO	25.9259
DKO	40
DKO	17.3913
DKO	4.54545
DKO	9.52381
