# Supplementary material for: Assembly of neuron- and radial glial-cell-derived extracellular matrix molecules promotes radial migration of developing cortical neurons
Source: eLife journal article supplement (doi:10.7554/elife.92342), 2023-11-09
Supplement: fig10-data1 [file Numerical source data for Figure 10.xlsx]

## Sheet: Fig10 d
Type	Length of the longest neurites
Control	115.307
Control	134.863
Control	55.593
Control	29.807
Control	56.977
Control	88.243
Control	71.303
Control	33.512
Control	54.1
Control	73.16
Control	85.499
Control	20.129
Control	30.327
Control	35.969
Control	52.173
Control	56.053
Control	29.736
Control	36.201
Control	0
Control	0
Control	94.745
Control	94.174
Control	56.96
Control	18.669
Control	116.461
Control	32.352
Control	89.15
Control	39.927
Control	23.657
Control	0
Control	0
Control	0
Control	59.101
Control	52.043
Control	45.937
Control	74.8
Control	77.954
Control	70.614
Control	60.411
Control	54.105
Control	18.937
Control	63.325
Control	39.456
Control	15.847
Control	97.299
Control	22.545
Control	64.435
Control	0
Control	0
Control	0
Control	0
Control	11.756
Control	0
Control	67.202
Control	35.885
Control	24.382
Control	41.692
Control	20.039
Control	20.154
Control	49.78
Control	23.217
Control	90.395
Control	17.738
Control	17.68
Control	46.162
Control	76.437
Control	17.187
Control	46.783
Control	14.387
Control	33.34
Control	99.772
Control	23.713
Control	36.88
Control	108.062
Control	13.902
Control	0
Control	0
Control	0
Control	0
Control	0
HA	112.868
HA	77.524
HA	37.93
HA	54.162
HA	97.44
HA	21.908
HA	48.255
HA	48.576
HA	118.425
HA	18.496
HA	24.984
HA	98.603
HA	67.676
HA	31.294
HA	18.245
HA	56.895
HA	0
HA	0
HA	170.216
HA	60.18
HA	96.901
HA	59.174
HA	90.863
HA	68.181
HA	23.452
HA	36.232
HA	29.79
HA	0
HA	46.594
HA	28.543
HA	33.884
HA	0
HA	61.994
HA	26.285
HA	14.469
HA	68.272
HA	82.593
HA	57.737
HA	59.16
HA	23.987
HA	46.778
HA	0
HA	21.232
HA	0
HA	0
HA	0
HA	62.452
HA	28.049
HA	33.679
HA	27.448
HA	25.697
HA	67.762
HA	32.522
HA	37.19
HA	14.344
HA	151.726
HA	74.212
HA	30.883
HA	24.868
HA	0
NCAN	33.129
NCAN	55.906
NCAN	29.702
NCAN	27.991
NCAN	49.419
NCAN	41.409
NCAN	95.198
NCAN	61.255
NCAN	61.052
NCAN	126.216
NCAN	0
NCAN	0
NCAN	0
NCAN	0
NCAN	17.166
NCAN	35.541
NCAN	22.343
NCAN	28.299
NCAN	22.63
NCAN	44.433
NCAN	24.339
NCAN	41.762
NCAN	31.765
NCAN	0
NCAN	0
NCAN	0
NCAN	25.143
NCAN	21.831
NCAN	85.332
NCAN	109.374
NCAN	30.178
NCAN	19.414
NCAN	18.569
NCAN	50.274
NCAN	54.986
NCAN	28.06
NCAN	12.552
NCAN	0
NCAN	0
NCAN	16.903
NCAN	17.627
NCAN	28.144
NCAN	27.335
NCAN	47.399
NCAN	18.402
NCAN	42.618
NCAN	27.089
NCAN	61.142
NCAN	33.576
NCAN	62.81
NCAN	34.679
NCAN	111.386
NCAN	0
NCAN	0
NCAN	0
TNC0.1	70.55
TNC0.1	34.595
TNC0.1	20.981
TNC0.1	18.355
TNC0.1	54.91
TNC0.1	19.407
TNC0.1	27.827
TNC0.1	30.929
TNC0.1	101.166
TNC0.1	27.694
TNC0.1	25.516
TNC0.1	16.197
TNC0.1	23.595
TNC0.1	102.758
TNC0.1	19.563
TNC0.1	0
TNC0.1	51.916
TNC0.1	64.599
TNC0.1	20.943
TNC0.1	42.647
TNC0.1	14.679
TNC0.1	21.667
TNC0.1	32.176
TNC0.1	18.831
TNC0.1	119.301
TNC0.1	43.663
TNC0.1	32.61
TNC0.1	12.981
TNC0.1	46.712
TNC0.1	0
TNC0.1	0
TNC0.1	0
TNC0.1	54.598
TNC0.1	31.423
TNC0.1	18.219
TNC0.1	55.189
TNC0.1	51.793
TNC0.1	40.705
TNC0.1	21.225
TNC0.1	96.568
TNC0.1	29.16
TNC0.1	23.079
TNC0.1	21.111
TNC0.1	12.454
TNC0.1	0
TNC0.1	0
TNC0.1	0
TNC0.1	22.801
TNC0.1	50.424
TNC0.1	111.122
TNC0.1	46.987
TNC0.1	29.405
TNC0.1	12.16
TNC0.1	56.692
TNC0.1	40.91
TNC0.1	61.487
TNC0.1	54.31
TNC0.1	21.392
TNC0.1	25.527
TNC0.1	97.348
TNC0.1	0
TNC0.1	0
TNC1.0	10.05
TNC1.0	24.286
TNC1.0	53.121
TNC1.0	23.236
TNC1.0	45.899
TNC1.0	57.04
TNC1.0	65.115
TNC1.0	21.051
TNC1.0	43.266
TNC1.0	42.217
TNC1.0	29.982
TNC1.0	95.188
TNC1.0	95.007
TNC1.0	37.861
TNC1.0	34.035
TNC1.0	101.541
TNC1.0	68.073
TNC1.0	0
TNC1.0	0
TNC1.0	26.273
TNC1.0	48.729
TNC1.0	26.735
TNC1.0	11.146
TNC1.0	120.805
TNC1.0	23.47
TNC1.0	26
TNC1.0	148.048
TNC1.0	31.151
TNC1.0	41.433
TNC1.0	19.048
TNC1.0	24.445
TNC1.0	57.013
TNC1.0	103.755
TNC1.0	39.733
TNC1.0	72.936
TNC1.0	20.518
TNC1.0	33.983
TNC1.0	136.718
TNC1.0	27.735
TNC1.0	92.678
TNC1.0	22.761
TNC1.0	0
TNC1.0	0
TNC1.0	0
TNC1.0	0
TNC1.0	80.403
TNC1.0	55.609
TNC1.0	67.81
TNC1.0	61.277
TNC1.0	76.05
TNC1.0	13.364
TNC1.0	14.182
TNC1.0	53.986
TNC1.0	64.961
TNC1.0	45.423
TNC1.0	27.498
TNC1.0	45.325
TNC1.0	14.981
TNC1.0	68.142
TNC1.0	41.805
TNC1.0	15.211
TNC1.0	33.721
TNC1.0	24.27
TNC1.0	17.494
TNC1.0	0
TNC1.0	53.087
TNC1.0	31.867
TNC1.0	28.381
TNC1.0	32.675
TNC1.0	22.128
TNC1.0	47.272
TNC1.0	53.55
TNC1.0	98.069
TNC1.0	55.12
TNC1.0	0
TNC1.0	0
TNC10	38.682
TNC10	56.722
TNC10	96.852
TNC10	55.602
TNC10	95.934
TNC10	73.097
TNC10	68.158
TNC10	29.946
TNC10	57.79
TNC10	111.669
TNC10	46.53
TNC10	0
TNC10	69.796
TNC10	29.584
TNC10	44.288
TNC10	123.497
TNC10	10.04
TNC10	22.724
TNC10	88.516
TNC10	36.899
TNC10	27.431
TNC10	31.374
TNC10	37.245
TNC10	56.862
TNC10	178.769
TNC10	230.036
TNC10	91.438
TNC10	41.992
TNC10	53.559
TNC10	61.315
TNC10	24.112
TNC10	163.77
TNC10	52.126
TNC10	0
TNC10	70.66
TNC10	47.843
TNC10	90.875
TNC10	31.584
TNC10	22.597
TNC10	56.721
TNC10	109.71
TNC10	81.081
TNC10	204.625
TNC10	78.192
TNC10	55.584
TNC10	36.001
TNC10	24.651
TNC10	85.654
TNC10	0
TNC10	58.634
TNC10	27.459
TNC10	95.193
TNC10	37.361
TNC10	91.133
TNC10	59.681
TNC10	69.995
TNC10	17.21
TNC10	104.948
TNC10	92.31
TNC10	44.716
TNC10	59.193
TNC10	41.272
TNC10	55.375
TNC10	140.543
TNC10	18.377
TNC10	59.548
TNC10	48.19
TNC10	46.177
TNC10	0

## Sheet: Fig10 e
Type	Total length of neurites
Control	133.74
Control	134.863
Control	74.28
Control	43.279
Control	93.794
Control	140.274
Control	93.694
Control	49.543
Control	54.1
Control	73.16
Control	113.261
Control	40.151
Control	77.84
Control	35.969
Control	62.821
Control	117.732
Control	104.798
Control	71.682
Control	0
Control	0
Control	119.419
Control	94.174
Control	83.14
Control	18.669
Control	138.074
Control	62.047
Control	89.15
Control	107.777
Control	23.657
Control	0
Control	0
Control	0
Control	105.057
Control	91.029
Control	45.937
Control	94.694
Control	100.926
Control	88.685
Control	88.082
Control	54.105
Control	33.993
Control	82.256
Control	128.077
Control	15.847
Control	153.662
Control	39.92
Control	82.627
Control	0
Control	0
Control	0
Control	0
Control	11.756
Control	0
Control	87.741
Control	64.204
Control	35.445
Control	41.692
Control	32.814
Control	20.154
Control	49.78
Control	64.197
Control	111.827
Control	33.408
Control	34.067
Control	46.162
Control	113.592
Control	17.187
Control	46.783
Control	14.387
Control	56.274
Control	174.7
Control	23.713
Control	47.343
Control	108.062
Control	25.425
Control	0
Control	0
Control	0
Control	0
Control	0
HA	152.065
HA	154.787
HA	37.93
HA	94.357
HA	154.426
HA	39.422
HA	88.305
HA	48.576
HA	205.346
HA	31.823
HA	48.206
HA	98.603
HA	103.959
HA	59.321
HA	35.437
HA	86.717
HA	0
HA	0
HA	201.24
HA	98.615
HA	112.593
HA	74.067
HA	172.33
HA	126.193
HA	23.452
HA	52.703
HA	43.671
HA	0
HA	67.425
HA	50.737
HA	47.01
HA	0
HA	61.994
HA	41.524
HA	14.469
HA	68.272
HA	157.591
HA	98.618
HA	143.266
HA	38.039
HA	46.778
HA	0
HA	21.232
HA	0
HA	0
HA	0
HA	99.909
HA	60.294
HA	46.805
HA	39.101
HA	47.842
HA	143.374
HA	47.81
HA	37.19
HA	14.344
HA	151.726
HA	74.212
HA	50.254
HA	37.642
HA	0
NCAN	49.525
NCAN	66.993
NCAN	70.259
NCAN	49.956
NCAN	78.015
NCAN	41.409
NCAN	123.785
NCAN	61.255
NCAN	79.266
NCAN	140.366
NCAN	0
NCAN	0
NCAN	0
NCAN	0
NCAN	17.166
NCAN	84.118
NCAN	22.343
NCAN	28.299
NCAN	43.243
NCAN	90.494
NCAN	24.339
NCAN	52.487
NCAN	63.082
NCAN	0
NCAN	0
NCAN	0
NCAN	49.23
NCAN	32.465
NCAN	120.302
NCAN	109.374
NCAN	82.864
NCAN	19.414
NCAN	18.569
NCAN	94.81
NCAN	68.222
NCAN	28.06
NCAN	12.552
NCAN	0
NCAN	0
NCAN	16.903
NCAN	17.627
NCAN	47.13
NCAN	45.396
NCAN	95.964
NCAN	28.516
NCAN	78.278
NCAN	88.061
NCAN	107.775
NCAN	52.22
NCAN	119.486
NCAN	65.334
NCAN	164.915
NCAN	0
NCAN	0
NCAN	0
TNC0.1	94.429
TNC0.1	71.375
TNC0.1	20.981
TNC0.1	18.355
TNC0.1	54.91
TNC0.1	19.407
TNC0.1	50.286
TNC0.1	56.05
TNC0.1	101.166
TNC0.1	44.192
TNC0.1	50.09
TNC0.1	32.376
TNC0.1	23.595
TNC0.1	125.305
TNC0.1	19.563
TNC0.1	0
TNC0.1	78.379
TNC0.1	106.513
TNC0.1	37.465
TNC0.1	54.54
TNC0.1	14.679
TNC0.1	40.919
TNC0.1	32.176
TNC0.1	32.931
TNC0.1	135.806
TNC0.1	79.911
TNC0.1	32.61
TNC0.1	25.148
TNC0.1	89.918
TNC0.1	0
TNC0.1	0
TNC0.1	0
TNC0.1	66.913
TNC0.1	45.869
TNC0.1	18.219
TNC0.1	99.627
TNC0.1	93.883
TNC0.1	40.705
TNC0.1	61.87
TNC0.1	197.527
TNC0.1	29.16
TNC0.1	23.079
TNC0.1	35.389
TNC0.1	12.454
TNC0.1	0
TNC0.1	0
TNC0.1	0
TNC0.1	44.271
TNC0.1	60.893
TNC0.1	138.447
TNC0.1	46.987
TNC0.1	29.405
TNC0.1	12.16
TNC0.1	115.895
TNC0.1	84.598
TNC0.1	73.937
TNC0.1	88.478
TNC0.1	38.33
TNC0.1	25.527
TNC0.1	113.9
TNC0.1	0
TNC0.1	0
TNC1.0	10.05
TNC1.0	40.076
TNC1.0	67.677
TNC1.0	45.514
TNC1.0	45.899
TNC1.0	112.781
TNC1.0	123.226
TNC1.0	35.036
TNC1.0	62.707
TNC1.0	106.37
TNC1.0	47.483
TNC1.0	200.293
TNC1.0	119.897
TNC1.0	100.268
TNC1.0	72.883
TNC1.0	117.025
TNC1.0	68.073
TNC1.0	0
TNC1.0	0
TNC1.0	45.599
TNC1.0	76.901
TNC1.0	26.735
TNC1.0	11.146
TNC1.0	153.56
TNC1.0	41.018
TNC1.0	26
TNC1.0	181.207
TNC1.0	55.352
TNC1.0	87.556
TNC1.0	33.928
TNC1.0	43.021
TNC1.0	98.297
TNC1.0	186.071
TNC1.0	84.723
TNC1.0	122.1
TNC1.0	37.008
TNC1.0	77.103
TNC1.0	167.846
TNC1.0	53.086
TNC1.0	139.231
TNC1.0	22.761
TNC1.0	0
TNC1.0	0
TNC1.0	0
TNC1.0	0
TNC1.0	96.966
TNC1.0	129.752
TNC1.0	91.473
TNC1.0	76.34
TNC1.0	126.417
TNC1.0	13.364
TNC1.0	14.182
TNC1.0	113.368
TNC1.0	186.092
TNC1.0	99.1
TNC1.0	27.498
TNC1.0	45.325
TNC1.0	14.981
TNC1.0	107.359
TNC1.0	58.437
TNC1.0	15.211
TNC1.0	109.087
TNC1.0	43.081
TNC1.0	29.071
TNC1.0	0
TNC1.0	92.005
TNC1.0	31.867
TNC1.0	28.381
TNC1.0	82.732
TNC1.0	40.46
TNC1.0	91.307
TNC1.0	70.901
TNC1.0	182.679
TNC1.0	72.301
TNC1.0	0
TNC1.0	0
TNC10	53.883
TNC10	99.87
TNC10	183.034
TNC10	78.327
TNC10	132.015
TNC10	194.738
TNC10	95.33
TNC10	84.274
TNC10	141.984
TNC10	126.587
TNC10	167.077
TNC10	0
TNC10	151.391
TNC10	51.763
TNC10	96.064
TNC10	159.964
TNC10	10.04
TNC10	42.556
TNC10	131.756
TNC10	65.768
TNC10	27.431
TNC10	61.847
TNC10	71.286
TNC10	105.239
TNC10	199.143
TNC10	294.54
TNC10	159.895
TNC10	118.133
TNC10	81.632
TNC10	137.036
TNC10	66.634
TNC10	180.044
TNC10	162.94
TNC10	0
TNC10	82.437
TNC10	106.404
TNC10	128.867
TNC10	49.862
TNC10	22.597
TNC10	120.741
TNC10	109.71
TNC10	192.362
TNC10	204.625
TNC10	146.115
TNC10	114.882
TNC10	36.001
TNC10	24.651
TNC10	146.876
TNC10	0
TNC10	113.591
TNC10	49.235
TNC10	206.78
TNC10	61.462
TNC10	133.81
TNC10	103.627
TNC10	69.995
TNC10	17.21
TNC10	136.911
TNC10	165.899
TNC10	77.989
TNC10	72.898
TNC10	41.272
TNC10	188.521
TNC10	200.307
TNC10	18.377
TNC10	59.548
TNC10	48.19
TNC10	111.725
TNC10	0

## Sheet: Fig10 f
Type	Number of neurites
Control	2
Control	1
Control	2
Control	2
Control	2
Control	3
Control	2
Control	2
Control	1
Control	1
Control	2
Control	2
Control	3
Control	1
Control	2
Control	3
Control	5
Control	2
Control	0
Control	0
Control	2
Control	1
Control	2
Control	1
Control	2
Control	2
Control	1
Control	3
Control	1
Control	0
Control	0
Control	0
Control	2
Control	3
Control	1
Control	2
Control	2
Control	2
Control	2
Control	1
Control	2
Control	2
Control	6
Control	1
Control	4
Control	2
Control	2
Control	0
Control	0
Control	0
Control	0
Control	1
Control	0
Control	2
Control	3
Control	2
Control	1
Control	2
Control	1
Control	1
Control	3
Control	2
Control	2
Control	2
Control	1
Control	2
Control	1
Control	1
Control	1
Control	2
Control	4
Control	1
Control	2
Control	1
Control	2
Control	0
Control	0
Control	0
Control	0
Control	0
HA	2
HA	3
HA	1
HA	3
HA	3
HA	2
HA	2
HA	1
HA	5
HA	2
HA	2
HA	1
HA	2
HA	2
HA	2
HA	2
HA	0
HA	0
HA	2
HA	2
HA	2
HA	2
HA	4
HA	3
HA	1
HA	2
HA	2
HA	0
HA	2
HA	2
HA	2
HA	0
HA	1
HA	2
HA	1
HA	1
HA	3
HA	3
HA	4
HA	2
HA	1
HA	0
HA	1
HA	0
HA	0
HA	0
HA	3
HA	3
HA	2
HA	2
HA	2
HA	4
HA	2
HA	1
HA	1
HA	1
HA	1
HA	2
HA	2
HA	0
NCAN	2
NCAN	2
NCAN	3
NCAN	2
NCAN	3
NCAN	1
NCAN	3
NCAN	1
NCAN	2
NCAN	2
NCAN	0
NCAN	0
NCAN	0
NCAN	0
NCAN	1
NCAN	3
NCAN	1
NCAN	1
NCAN	2
NCAN	3
NCAN	1
NCAN	2
NCAN	3
NCAN	0
NCAN	0
NCAN	0
NCAN	2
NCAN	2
NCAN	3
NCAN	1
NCAN	3
NCAN	1
NCAN	1
NCAN	3
NCAN	2
NCAN	1
NCAN	1
NCAN	0
NCAN	0
NCAN	1
NCAN	1
NCAN	2
NCAN	2
NCAN	3
NCAN	2
NCAN	2
NCAN	4
NCAN	3
NCAN	2
NCAN	3
NCAN	3
NCAN	3
NCAN	0
NCAN	0
NCAN	0
TNC0.1	2
TNC0.1	3
TNC0.1	1
TNC0.1	1
TNC0.1	1
TNC0.1	1
TNC0.1	2
TNC0.1	2
TNC0.1	1
TNC0.1	2
TNC0.1	2
TNC0.1	2
TNC0.1	1
TNC0.1	2
TNC0.1	1
TNC0.1	0
TNC0.1	2
TNC0.1	3
TNC0.1	2
TNC0.1	2
TNC0.1	1
TNC0.1	2
TNC0.1	1
TNC0.1	2
TNC0.1	2
TNC0.1	2
TNC0.1	1
TNC0.1	2
TNC0.1	4
TNC0.1	0
TNC0.1	0
TNC0.1	0
TNC0.1	2
TNC0.1	2
TNC0.1	1
TNC0.1	3
TNC0.1	3
TNC0.1	1
TNC0.1	3
TNC0.1	4
TNC0.1	1
TNC0.1	1
TNC0.1	2
TNC0.1	1
TNC0.1	0
TNC0.1	0
TNC0.1	0
TNC0.1	2
TNC0.1	2
TNC0.1	2
TNC0.1	1
TNC0.1	1
TNC0.1	1
TNC0.1	3
TNC0.1	3
TNC0.1	2
TNC0.1	2
TNC0.1	2
TNC0.1	1
TNC0.1	2
TNC0.1	0
TNC0.1	0
TNC1.0	1
TNC1.0	2
TNC1.0	2
TNC1.0	2
TNC1.0	1
TNC1.0	3
TNC1.0	3
TNC1.0	2
TNC1.0	2
TNC1.0	3
TNC1.0	2
TNC1.0	4
TNC1.0	2
TNC1.0	4
TNC1.0	3
TNC1.0	2
TNC1.0	1
TNC1.0	0
TNC1.0	0
TNC1.0	2
TNC1.0	2
TNC1.0	1
TNC1.0	1
TNC1.0	3
TNC1.0	2
TNC1.0	1
TNC1.0	3
TNC1.0	2
TNC1.0	3
TNC1.0	2
TNC1.0	2
TNC1.0	3
TNC1.0	4
TNC1.0	3
TNC1.0	3
TNC1.0	2
TNC1.0	3
TNC1.0	3
TNC1.0	2
TNC1.0	2
TNC1.0	1
TNC1.0	0
TNC1.0	0
TNC1.0	0
TNC1.0	0
TNC1.0	2
TNC1.0	3
TNC1.0	2
TNC1.0	2
TNC1.0	3
TNC1.0	1
TNC1.0	1
TNC1.0	3
TNC1.0	4
TNC1.0	3
TNC1.0	1
TNC1.0	1
TNC1.0	1
TNC1.0	3
TNC1.0	2
TNC1.0	1
TNC1.0	4
TNC1.0	2
TNC1.0	2
TNC1.0	0
TNC1.0	2
TNC1.0	1
TNC1.0	1
TNC1.0	3
TNC1.0	2
TNC1.0	2
TNC1.0	2
TNC1.0	2
TNC1.0	2
TNC1.0	0
TNC1.0	0
TNC10	2
TNC10	3
TNC10	4
TNC10	2
TNC10	3
TNC10	3
TNC10	2
TNC10	4
TNC10	3
TNC10	2
TNC10	5
TNC10	0
TNC10	3
TNC10	2
TNC10	3
TNC10	2
TNC10	1
TNC10	2
TNC10	2
TNC10	2
TNC10	1
TNC10	2
TNC10	2
TNC10	2
TNC10	2
TNC10	3
TNC10	3
TNC10	4
TNC10	2
TNC10	3
TNC10	3
TNC10	2
TNC10	4
TNC10	0
TNC10	2
TNC10	3
TNC10	3
TNC10	2
TNC10	1
TNC10	3
TNC10	1
TNC10	4
TNC10	1
TNC10	3
TNC10	3
TNC10	1
TNC10	1
TNC10	3
TNC10	0
TNC10	3
TNC10	2
TNC10	4
TNC10	2
TNC10	3
TNC10	3
TNC10	1
TNC10	1
TNC10	2
TNC10	4
TNC10	3
TNC10	2
TNC10	1
TNC10	5
TNC10	4
TNC10	1
TNC10	1
TNC10	1
TNC10	3
TNC10	0

## Sheet: Fig10 g
Type	Stage 1	Stage 2	Stage 3
Control	10	35	55
Control	25	33.3333	41.6667
Control	21.0526	26.3158	52.6316
Control	20.6897	62.069	17.2414
HA	11.1111	44.4444	44.4444
HA	14.2857	42.8571	42.8571
HA	28.5714	35.7143	35.7143
HA	7.14286	64.2857	28.5714
NCAN	28.5714	35.7143	35.7143
NCAN	25	75	0
NCAN	15.3846	53.8462	30.7692
NCAN	18.75	62.5	18.75
TNC0.1	6.25	68.75	25
TNC0.1	18.75	62.5	18.75
TNC0.1	20	53.3333	26.6667
TNC0.1	13.3333	46.6667	40
TNC1.0	10.5263	52.6316	36.8421
TNC1.0	15.3846	57.6923	26.9231
TNC1.0	5	55	40
TNC1.0	18.1818	45.4545	36.3636
TNC10	8.33333	25	66.6667
TNC10	4.54545	45.4545	50
TNC10	6.66667	33.3333	60
TNC10	5	40	55

## Sheet: Fig10 i
Type	length of the longest neurite
WT	43.474
WT	17.428
WT	75.721
WT	24.536
WT	84.814
WT	56.765
WT	40.813
WT	36.602
WT	100.918
WT	179.412
WT	54.55
WT	83.468
WT	121.476
WT	116.301
WT	87.504
WT	60.841
WT	22.876
WT	123.032
WT	26.063
WT	45.533
WT	69.17
WT	40.004
WT	18.032
WT	31.761
WT	71.241
WT	64.218
WT	189.878
WT	16.08
WT	16.671
WT	31.042
WT	70.085
WT	19.494
WT	0
WT	0
WT	0
WT	107.095
WT	222.485
WT	19.888
WT	47.284
WT	57.867
WT	76.948
WT	60.907
WT	115.477
WT	107.867
WT	93.339
WT	135.103
WT	268.149
WT	24.173
WT	37.726
WT	40.481
WT	23.54
WT	92.823
WT	71.143
WT	51.736
WT	40.383
WT	37.088
WT	28.953
WT	15.883
WT	76.849
WT	62.901
WT	205.583
WT	68.962
WT	42.062
WT	84.382
WT	38.274
WT	107.392
WT	51.412
WT	30.267
WT	87.947
WT	99.189
WT	0
WT	0
WT	0
WT	30.717
WT	17.84
WT	35.82
WT	32.015
WT	29.433
WT	50.495
WT	36.172
WT	42.694
WT	180.148
WT	62.058
WT	60.422
WT	92.567
WT	18.383
WT	61.599
WT	41.042
WT	33.264
WT	66.582
WT	51.841
WT	0
WT	0
WT	0
WT	0
WT	0
NCAN KO	34.803
NCAN KO	48.492
NCAN KO	35.665
NCAN KO	103.462
NCAN KO	231.731
NCAN KO	54.56
NCAN KO	60.791
NCAN KO	17.831
NCAN KO	60.526
NCAN KO	79.193
NCAN KO	89.681
NCAN KO	54.76
NCAN KO	24.888
NCAN KO	96.136
NCAN KO	67.531
NCAN KO	43.941
NCAN KO	16.921
NCAN KO	48.303
NCAN KO	109.763
NCAN KO	28.866
NCAN KO	41.843
NCAN KO	24.197
NCAN KO	93.971
NCAN KO	37.11
NCAN KO	80.661
NCAN KO	98.583
NCAN KO	19.248
NCAN KO	21.228
NCAN KO	23.972
NCAN KO	131.857
NCAN KO	154.846
NCAN KO	25.089
NCAN KO	32.329
NCAN KO	25.636
NCAN KO	26.077
NCAN KO	0
NCAN KO	0
NCAN KO	0
NCAN KO	0
NCAN KO	0
NCAN KO	0
NCAN KO	0
NCAN KO	0
NCAN KO	0
NCAN KO	0
NCAN KO	28.302
NCAN KO	30.927
NCAN KO	75.829
NCAN KO	47.991
NCAN KO	102.395
NCAN KO	14.136
NCAN KO	106.722
NCAN KO	35.431
NCAN KO	43.038
NCAN KO	51.634
NCAN KO	16.338
NCAN KO	17.675
NCAN KO	131.205
NCAN KO	38.444
NCAN KO	57.323
NCAN KO	27.377
NCAN KO	47.525
NCAN KO	35.815
NCAN KO	19.866
NCAN KO	17.495
NCAN KO	31.37
NCAN KO	101.809
NCAN KO	59.842
NCAN KO	42.9
NCAN KO	40.7
NCAN KO	0
NCAN KO	0
NCAN KO	0
NCAN KO	0
NCAN KO	0
NCAN KO	16.229
NCAN KO	28.783
NCAN KO	32.507
NCAN KO	81.075
NCAN KO	74.033
NCAN KO	16.243
NCAN KO	14.624
NCAN KO	12.107
NCAN KO	37.312
NCAN KO	87.372
NCAN KO	28.952
NCAN KO	45.933
NCAN KO	35.472
NCAN KO	50.821
NCAN KO	91.964
NCAN KO	23.912
NCAN KO	84.921
NCAN KO	19.064
NCAN KO	13.684
NCAN KO	50.762
NCAN KO	43.57
NCAN KO	66.815
NCAN KO	137.634
NCAN KO	17.074
NCAN KO	0
NCAN KO	0

## Sheet: Fig10 j
Type	Total length of neurites
WT	102.958
WT	30.798
WT	97.358
WT	24.536
WT	119.542
WT	97.408
WT	106.711
WT	65.926
WT	173.789
WT	179.412
WT	54.55
WT	113.073
WT	134.739
WT	132.597
WT	205.293
WT	80.219
WT	22.876
WT	211.849
WT	48.357
WT	59.119
WT	113.274
WT	50.086
WT	18.032
WT	81.501
WT	113.298
WT	113.951
WT	189.878
WT	30.618
WT	16.671
WT	31.042
WT	70.085
WT	34.683
WT	0
WT	0
WT	0
WT	224.042
WT	250.874
WT	37.264
WT	60.058
WT	57.867
WT	111.884
WT	117.489
WT	156.482
WT	179.915
WT	156.94
WT	208.187
WT	283.695
WT	63.819
WT	80.092
WT	149.303
WT	40.897
WT	130.304
WT	71.143
WT	70.543
WT	77.107
WT	37.088
WT	44.888
WT	15.883
WT	155.633
WT	89.473
WT	242.637
WT	135.086
WT	109.909
WT	84.382
WT	122.044
WT	170.457
WT	130.085
WT	81.761
WT	99.296
WT	136.469
WT	0
WT	0
WT	0
WT	59.583
WT	32.643
WT	98.868
WT	82.293
WT	47.073
WT	66.515
WT	124.798
WT	65.419
WT	312.996
WT	101.335
WT	73.595
WT	129.017
WT	18.383
WT	61.599
WT	61.528
WT	84.089
WT	89.988
WT	98.769
WT	0
WT	0
WT	0
WT	0
WT	0
NCAN KO	34.803
NCAN KO	76.956
NCAN KO	52.76
NCAN KO	103.462
NCAN KO	275.65
NCAN KO	129.122
NCAN KO	95.023
NCAN KO	33.192
NCAN KO	89.658
NCAN KO	130.437
NCAN KO	89.681
NCAN KO	77.315
NCAN KO	73.515
NCAN KO	133.613
NCAN KO	115.537
NCAN KO	90.18
NCAN KO	44.812
NCAN KO	90.27
NCAN KO	109.763
NCAN KO	44.821
NCAN KO	41.843
NCAN KO	39.79
NCAN KO	119.913
NCAN KO	63.642
NCAN KO	105.123
NCAN KO	120.217
NCAN KO	48.321
NCAN KO	36.102
NCAN KO	61.835
NCAN KO	168.582
NCAN KO	182.805
NCAN KO	39.364
NCAN KO	32.329
NCAN KO	25.636
NCAN KO	79.552
NCAN KO	0
NCAN KO	0
NCAN KO	0
NCAN KO	0
NCAN KO	0
NCAN KO	0
NCAN KO	0
NCAN KO	0
NCAN KO	0
NCAN KO	0
NCAN KO	68.463
NCAN KO	81.202
NCAN KO	114.703
NCAN KO	110.398
NCAN KO	102.395
NCAN KO	28.162
NCAN KO	121.644
NCAN KO	89.998
NCAN KO	43.038
NCAN KO	79.469
NCAN KO	31.574
NCAN KO	17.675
NCAN KO	166.804
NCAN KO	98.096
NCAN KO	118.454
NCAN KO	27.377
NCAN KO	70.955
NCAN KO	80.563
NCAN KO	19.866
NCAN KO	17.495
NCAN KO	57.196
NCAN KO	120.932
NCAN KO	122.18
NCAN KO	85.543
NCAN KO	55.578
NCAN KO	0
NCAN KO	0
NCAN KO	0
NCAN KO	0
NCAN KO	0
NCAN KO	45.441
NCAN KO	45.699
NCAN KO	32.507
NCAN KO	122.067
NCAN KO	84.953
NCAN KO	16.243
NCAN KO	26.129
NCAN KO	12.107
NCAN KO	80.384
NCAN KO	99.826
NCAN KO	44.02
NCAN KO	118.052
NCAN KO	56.4
NCAN KO	79.984
NCAN KO	122.451
NCAN KO	23.912
NCAN KO	100.898
NCAN KO	31.68
NCAN KO	13.684
NCAN KO	50.762
NCAN KO	70.664
NCAN KO	100.689
NCAN KO	153.761
NCAN KO	47.586
NCAN KO	0
NCAN KO	0

## Sheet: Fig10 k
Type	Number of neurites
WT	4
WT	2
WT	2
WT	1
WT	3
WT	3
WT	4
WT	3
WT	4
WT	1
WT	1
WT	2
WT	2
WT	2
WT	5
WT	2
WT	1
WT	4
WT	2
WT	2
WT	3
WT	2
WT	1
WT	3
WT	3
WT	3
WT	1
WT	2
WT	1
WT	1
WT	1
WT	2
WT	0
WT	0
WT	0
WT	4
WT	2
WT	2
WT	2
WT	1
WT	3
WT	4
WT	3
WT	4
WT	4
WT	4
WT	2
WT	3
WT	3
WT	5
WT	2
WT	3
WT	1
WT	2
WT	2
WT	1
WT	2
WT	1
WT	4
WT	2
WT	3
WT	4
WT	4
WT	1
WT	4
WT	3
WT	5
WT	4
WT	2
WT	3
WT	0
WT	0
WT	0
WT	2
WT	2
WT	4
WT	3
WT	2
WT	2
WT	4
WT	2
WT	3
WT	2
WT	2
WT	2
WT	1
WT	1
WT	2
WT	3
WT	2
WT	2
WT	0
WT	0
WT	0
WT	0
WT	0
NCAN KO	1
NCAN KO	2
NCAN KO	2
NCAN KO	1
NCAN KO	3
NCAN KO	3
NCAN KO	2
NCAN KO	2
NCAN KO	2
NCAN KO	3
NCAN KO	1
NCAN KO	2
NCAN KO	3
NCAN KO	3
NCAN KO	2
NCAN KO	3
NCAN KO	3
NCAN KO	2
NCAN KO	1
NCAN KO	2
NCAN KO	1
NCAN KO	2
NCAN KO	3
NCAN KO	2
NCAN KO	2
NCAN KO	2
NCAN KO	3
NCAN KO	2
NCAN KO	3
NCAN KO	3
NCAN KO	2
NCAN KO	2
NCAN KO	1
NCAN KO	1
NCAN KO	4
NCAN KO	0
NCAN KO	0
NCAN KO	0
NCAN KO	0
NCAN KO	0
NCAN KO	0
NCAN KO	0
NCAN KO	0
NCAN KO	0
NCAN KO	0
NCAN KO	3
NCAN KO	3
NCAN KO	3
NCAN KO	3
NCAN KO	1
NCAN KO	2
NCAN KO	2
NCAN KO	4
NCAN KO	1
NCAN KO	3
NCAN KO	2
NCAN KO	1
NCAN KO	3
NCAN KO	4
NCAN KO	3
NCAN KO	1
NCAN KO	2
NCAN KO	3
NCAN KO	1
NCAN KO	1
NCAN KO	2
NCAN KO	2
NCAN KO	4
NCAN KO	3
NCAN KO	2
NCAN KO	0
NCAN KO	0
NCAN KO	0
NCAN KO	0
NCAN KO	0
NCAN KO	3
NCAN KO	2
NCAN KO	1
NCAN KO	3
NCAN KO	2
NCAN KO	1
NCAN KO	2
NCAN KO	1
NCAN KO	3
NCAN KO	2
NCAN KO	2
NCAN KO	4
NCAN KO	2
NCAN KO	3
NCAN KO	3
NCAN KO	1
NCAN KO	2
NCAN KO	2
NCAN KO	1
NCAN KO	1
NCAN KO	2
NCAN KO	2
NCAN KO	2
NCAN KO	3
NCAN KO	0
NCAN KO	0
