# Supplementary material for: Assembly of neuron- and radial glial-cell-derived extracellular matrix molecules promotes radial migration of developing cortical neurons
Source: eLife journal article supplement (doi:10.7554/elife.92342), 2023-11-09
Supplement: fig10-figsupp1-data1 [file Numerical source data for Figure 10-figure supplement 1.xlsx]

## Sheet: Fig10 supp1 b
Type	Length of the longest neurite
Control	30.845
Control	41.121
Control	255.631
Control	95.235
Control	97.262
Control	22.925
Control	102.718
Control	118.782
Control	94.332
Control	114.691
Control	42.875
Control	107.519
Control	203.594
Control	157.921
Control	25.804
Control	308.616
Control	135.544
Control	41.859
Control	127.294
Control	222.175
Control	78.799
Control	148.612
Control	62.62
Control	77.994
Control	0
Control	64.911
Control	189.737
Control	63.151
Control	85.199
Control	143.082
Control	145.504
Control	163.167
Control	198.532
Control	21.594
Control	144.852
Control	216.717
Control	218.77
Control	177.696
Control	59.95
Control	267.067
Control	184.606
Control	102.477
Control	79.301
Control	105.966
Control	149.399
Control	168.362
Control	137.389
Control	149.391
Control	101.311
Control	172.801
Control	136.883
Control	213.04
Control	129.575
Control	87.961
Control	173.938
Control	160.787
Control	124.875
Control	70.545
Control	151.832
Control	31.561
Control	116.571
Control	109.631
Control	48.233
Control	39.225
Control	185.341
Control	309.058
Control	168.82
Control	30.795
Control	53.385
Control	58.116
Control	63.441
Control	71.515
Control	70.944
Control	38.85
Control	175.541
Control	145.829
Control	120.642
Control	179.271
HA	97.072
HA	226.466
HA	115.81
HA	103.319
HA	192.878
HA	163.605
HA	34.643
HA	116.274
HA	168.765
HA	57.277
HA	155.763
HA	273.634
HA	50.297
HA	103.375
HA	172.665
HA	110.162
HA	58.38
HA	120
HA	200.07
HA	124.257
HA	155.197
HA	140.021
HA	155.011
HA	134.443
HA	20.898
HA	108.971
HA	92.074
HA	187.304
HA	143.669
HA	245.376
HA	0
HA	212.106
HA	134.38
HA	108.238
HA	158.244
HA	184.683
HA	178.573
HA	94.14
HA	194.198
HA	198.571
HA	96.683
HA	92.7
HA	94.017
HA	136.112
HA	224.727
HA	153.492
HA	55.302
HA	51.932
HA	92.445
HA	187.385
HA	103.709
HA	61.065
HA	203.372
HA	160.298
HA	114.222
NCAN	132.33
NCAN	164.111
NCAN	83.492
NCAN	101.906
NCAN	147.507
NCAN	266.967
NCAN	211.974
NCAN	23.912
NCAN	117.326
NCAN	148.677
NCAN	71.826
NCAN	285.398
NCAN	393.789
NCAN	167.363
NCAN	58.398
NCAN	28.004
NCAN	72.267
NCAN	133.457
NCAN	66.276
NCAN	129.821
NCAN	104.723
NCAN	250.791
NCAN	66.191
NCAN	28.193
NCAN	35.794
NCAN	202.788
NCAN	43.044
NCAN	18.223
NCAN	94.744
NCAN	85.737
NCAN	67.079
NCAN	130.011
NCAN	89.98
NCAN	101.223
NCAN	107.793
NCAN	178.591
NCAN	0
NCAN	77.364
NCAN	100.309
NCAN	117.918
NCAN	510.494
NCAN	45.945
NCAN	88.496
NCAN	90.787
NCAN	182.08
NCAN	466.393
NCAN	211.028
NCAN	60.015
NCAN	24.404
NCAN	31.339
NCAN	87.412
NCAN	137.523
NCAN	112.301
NCAN	28.936
NCAN	54.067
NCAN	124.285
NCAN	161.688
NCAN	87.547
NCAN	159.458
NCAN	187.082
NCAN	83.582
NCAN	199.356
NCAN	69.131
NCAN	41.331
NCAN	317.082
TNC0.1	272.899
TNC0.1	99.661
TNC0.1	115.524
TNC0.1	160.16
TNC0.1	68.156
TNC0.1	151.637
TNC0.1	64.17
TNC0.1	200.969
TNC0.1	65.662
TNC0.1	44.649
TNC0.1	179.64
TNC0.1	90.316
TNC0.1	50.45
TNC0.1	49.643
TNC0.1	32.864
TNC0.1	150.792
TNC0.1	89.058
TNC0.1	87.133
TNC0.1	128.881
TNC0.1	62.875
TNC0.1	77.042
TNC0.1	0
TNC0.1	147.051
TNC0.1	97.786
TNC0.1	136.979
TNC0.1	43.76
TNC0.1	81.303
TNC0.1	109.337
TNC0.1	43.463
TNC0.1	41.02
TNC0.1	44.484
TNC0.1	148.836
TNC0.1	99.735
TNC0.1	148.835
TNC0.1	76.368
TNC0.1	140.65
TNC0.1	86.501
TNC0.1	117.329
TNC0.1	127.208
TNC0.1	78.729
TNC0.1	38.952
TNC0.1	182.548
TNC0.1	168.275
TNC0.1	187.36
TNC0.1	74.674
TNC0.1	155.052
TNC0.1	110.084
TNC0.1	31.331
TNC0.1	255.876
TNC0.1	118.984
TNC0.1	162.068
TNC0.1	153.977
TNC0.1	160.137
TNC0.1	108.242
TNC0.1	175.281
TNC1.0	42.797
TNC1.0	57.015
TNC1.0	54.586
TNC1.0	29.434
TNC1.0	23.057
TNC1.0	215.468
TNC1.0	29.416
TNC1.0	268.014
TNC1.0	186.079
TNC1.0	73.395
TNC1.0	133.413
TNC1.0	26.014
TNC1.0	68.847
TNC1.0	117.27
TNC1.0	86.515
TNC1.0	146.096
TNC1.0	142.512
TNC1.0	147.535
TNC1.0	166.871
TNC1.0	134.105
TNC1.0	151.559
TNC1.0	105.333
TNC1.0	72.362
TNC1.0	88.477
TNC1.0	152.831
TNC1.0	210.38
TNC1.0	104.691
TNC1.0	160.719
TNC1.0	145.535
TNC1.0	102.773
TNC1.0	117.894
TNC1.0	50.036
TNC1.0	183.402
TNC1.0	131.904
TNC1.0	78.7
TNC1.0	144.992
TNC1.0	43.654
TNC1.0	35.871
TNC1.0	71.644
TNC1.0	156.172
TNC1.0	183.882
TNC1.0	29.503
TNC1.0	145.881
TNC1.0	217.328
TNC1.0	32.513
TNC1.0	298.568
TNC1.0	186.494
TNC1.0	157.544
TNC1.0	101.697
TNC1.0	101.166
TNC1.0	164.542
TNC1.0	105.446
TNC1.0	55.754
TNC1.0	194.439
TNC1.0	79.168
TNC1.0	106.968
TNC1.0	156.768
TNC1.0	196.314
TNC1.0	114.382
TNC1.0	178.027
TNC1.0	118.438
TNC1.0	260.227
TNC1.0	256.049
TNC1.0	185.653
TNC1.0	130.044
TNC1.0	132.072
TNC10	154.244
TNC10	242.803
TNC10	251.507
TNC10	88.772
TNC10	156.706
TNC10	50.963
TNC10	99.756
TNC10	148.572
TNC10	239.723
TNC10	141.782
TNC10	61.688
TNC10	104.526
TNC10	117.732
TNC10	191.277
TNC10	184.139
TNC10	221.818
TNC10	38.666
TNC10	191.479
TNC10	300.961
TNC10	319.658
TNC10	97.703
TNC10	115.244
TNC10	274.824
TNC10	205.936
TNC10	116.251
TNC10	115.634
TNC10	108.398
TNC10	91.426
TNC10	141.119
TNC10	110.919
TNC10	156.883
TNC10	118.288
TNC10	40.575
TNC10	184.729
TNC10	280.022
TNC10	248.208
TNC10	342.648
TNC10	147.016
TNC10	226.608
TNC10	177.55
TNC10	148.522
TNC10	122.768
TNC10	121.406
TNC10	133.647
TNC10	192.148
TNC10	198.86
TNC10	41.855
TNC10	152.161
TNC10	66.297
TNC10	163.942
TNC10	96.744
TNC10	150.835
TNC10	250.573
TNC10	159.375
TNC10	68.422
TNC10	132.159
TNC10	77.758
TNC10	305.67
TNC10	116.571
TNC10	262.747
TNC10	180.883
TNC10	89.295
TNC10	160.168
TNC10	108.162
TNC10	71.376
TNC10	111.687
TNC10	304.741
TNC10	180.085
TNC10	32.175
TNC10	274.902

## Sheet: Fig10 supp1 c
Type	Total length of neurites
Control	52.097
Control	41.121
Control	419.414
Control	160.647
Control	137.786
Control	43.313
Control	165.449
Control	236.097
Control	115.574
Control	183.054
Control	66.464
Control	220.611
Control	254.745
Control	208.955
Control	47.66
Control	326.816
Control	160.113
Control	101.493
Control	205.552
Control	289.537
Control	100.673
Control	171.738
Control	113.138
Control	105.775
Control	0
Control	158.977
Control	211.301
Control	92.857
Control	159.031
Control	143.082
Control	221.202
Control	194.792
Control	234.946
Control	21.594
Control	200.132
Control	304.978
Control	254.303
Control	193.077
Control	85.512
Control	311.992
Control	201.151
Control	150.684
Control	157.704
Control	184.285
Control	215.766
Control	249.637
Control	222.826
Control	235.602
Control	174.547
Control	205.213
Control	200.87
Control	231.311
Control	152.95
Control	104.411
Control	205.098
Control	192.313
Control	192.17
Control	175.256
Control	175.56
Control	58.352
Control	250.11
Control	152.13
Control	48.233
Control	72.993
Control	206.024
Control	381.852
Control	190.451
Control	109.903
Control	108.151
Control	159.676
Control	100.087
Control	172.036
Control	191.403
Control	57.027
Control	223.612
Control	145.829
Control	159.567
Control	214.423
HA	153.102
HA	328.714
HA	159.83
HA	168.569
HA	298.582
HA	264.714
HA	51.599
HA	158.324
HA	254.288
HA	179.588
HA	201.913
HA	321.77
HA	81.837
HA	126.125
HA	198.848
HA	154.088
HA	103.457
HA	170.244
HA	222.446
HA	166.897
HA	198.51
HA	185.281
HA	201.71
HA	180.396
HA	38.71
HA	108.971
HA	223.172
HA	200.723
HA	252.661
HA	291.681
HA	0
HA	264.165
HA	154.658
HA	153.277
HA	225.423
HA	201.386
HA	194.952
HA	141.428
HA	218.979
HA	262.929
HA	171.42
HA	269.648
HA	172.926
HA	219.724
HA	285.693
HA	316.741
HA	155.267
HA	82.236
HA	169.264
HA	249.106
HA	125.142
HA	126.794
HA	228.119
HA	192.226
HA	146.512
NCAN	228.155
NCAN	274.675
NCAN	100.448
NCAN	146.058
NCAN	203.265
NCAN	307.263
NCAN	245.522
NCAN	47.383
NCAN	178.643
NCAN	162.893
NCAN	171.41
NCAN	381.171
NCAN	413.672
NCAN	188.121
NCAN	118.724
NCAN	55.625
NCAN	141.668
NCAN	156.613
NCAN	137.389
NCAN	142.29
NCAN	134.076
NCAN	288.604
NCAN	66.191
NCAN	51.187
NCAN	69.786
NCAN	290.829
NCAN	107.277
NCAN	31.305
NCAN	110.198
NCAN	110.423
NCAN	94.383
NCAN	178.274
NCAN	200.492
NCAN	120.915
NCAN	136.412
NCAN	202.684
NCAN	0
NCAN	169.355
NCAN	160.107
NCAN	153.401
NCAN	545.205
NCAN	103.241
NCAN	137.004
NCAN	118.242
NCAN	243.727
NCAN	521.469
NCAN	262.479
NCAN	60.015
NCAN	64.12
NCAN	82.886
NCAN	146.342
NCAN	184.234
NCAN	151.481
NCAN	51.083
NCAN	54.067
NCAN	143.327
NCAN	236.159
NCAN	112.513
NCAN	192.921
NCAN	223.75
NCAN	160.069
NCAN	219.096
NCAN	128.502
NCAN	82.346
NCAN	371.012
TNC0.1	351.639
TNC0.1	182.813
TNC0.1	136.394
TNC0.1	220.241
TNC0.1	68.156
TNC0.1	237.107
TNC0.1	92.325
TNC0.1	262.835
TNC0.1	91.99
TNC0.1	68.87
TNC0.1	238.188
TNC0.1	118.072
TNC0.1	86.781
TNC0.1	183.679
TNC0.1	107.371
TNC0.1	199.793
TNC0.1	123.4
TNC0.1	180.4
TNC0.1	166.168
TNC0.1	62.875
TNC0.1	119.605
TNC0.1	0
TNC0.1	170.213
TNC0.1	150.036
TNC0.1	181.873
TNC0.1	96.796
TNC0.1	153.494
TNC0.1	153.841
TNC0.1	81.544
TNC0.1	57.72
TNC0.1	64.543
TNC0.1	187.423
TNC0.1	202.87
TNC0.1	169.497
TNC0.1	121.672
TNC0.1	174.683
TNC0.1	139.458
TNC0.1	132.418
TNC0.1	168.335
TNC0.1	127.273
TNC0.1	56.339
TNC0.1	236.141
TNC0.1	201.078
TNC0.1	244.364
TNC0.1	147.543
TNC0.1	272.653
TNC0.1	210.061
TNC0.1	58.027
TNC0.1	278.395
TNC0.1	178.485
TNC0.1	213.195
TNC0.1	168.806
TNC0.1	175.342
TNC0.1	128.446
TNC0.1	210.601
TNC1.0	107.451
TNC1.0	75.051
TNC1.0	118.74
TNC1.0	29.434
TNC1.0	43.754
TNC1.0	258.519
TNC1.0	71.248
TNC1.0	320.282
TNC1.0	208.807
TNC1.0	201.538
TNC1.0	190.691
TNC1.0	26.014
TNC1.0	95.041
TNC1.0	188.76
TNC1.0	171.573
TNC1.0	160.365
TNC1.0	169.874
TNC1.0	162.547
TNC1.0	218.957
TNC1.0	161.364
TNC1.0	304.678
TNC1.0	209.14
TNC1.0	128.501
TNC1.0	192.561
TNC1.0	221.917
TNC1.0	259.844
TNC1.0	124.033
TNC1.0	218.571
TNC1.0	225.293
TNC1.0	127.124
TNC1.0	141.732
TNC1.0	80.583
TNC1.0	208.693
TNC1.0	201.651
TNC1.0	127.313
TNC1.0	184.628
TNC1.0	75.343
TNC1.0	71.012
TNC1.0	171.13
TNC1.0	346.934
TNC1.0	203.016
TNC1.0	49.228
TNC1.0	212.895
TNC1.0	328.766
TNC1.0	56.289
TNC1.0	381.175
TNC1.0	246.876
TNC1.0	185.518
TNC1.0	163.344
TNC1.0	242.807
TNC1.0	189.826
TNC1.0	147.898
TNC1.0	55.754
TNC1.0	249.836
TNC1.0	154.894
TNC1.0	207.848
TNC1.0	234.842
TNC1.0	259.627
TNC1.0	165.574
TNC1.0	194.739
TNC1.0	186.003
TNC1.0	480.332
TNC1.0	285.844
TNC1.0	253.087
TNC1.0	157.162
TNC1.0	223.314
TNC10	217.154
TNC10	337.567
TNC10	306.265
TNC10	106.28
TNC10	262.061
TNC10	86.911
TNC10	232.299
TNC10	214.803
TNC10	306.573
TNC10	182.236
TNC10	101.965
TNC10	124.025
TNC10	173.132
TNC10	273.57
TNC10	212.176
TNC10	244.307
TNC10	63.77
TNC10	254.07
TNC10	328.727
TNC10	375.243
TNC10	162.091
TNC10	168.096
TNC10	342.134
TNC10	236.282
TNC10	172.602
TNC10	154.026
TNC10	178.686
TNC10	141.339
TNC10	172.273
TNC10	172.1
TNC10	277.428
TNC10	212.231
TNC10	127.594
TNC10	240.338
TNC10	511.73
TNC10	289.404
TNC10	395.894
TNC10	222.501
TNC10	252.401
TNC10	219.83
TNC10	195.408
TNC10	296.538
TNC10	242.126
TNC10	215.893
TNC10	222.973
TNC10	272.689
TNC10	144.087
TNC10	191.925
TNC10	138.388
TNC10	242.036
TNC10	164.289
TNC10	215.929
TNC10	344.848
TNC10	281.862
TNC10	93.416
TNC10	151.259
TNC10	164.528
TNC10	386.495
TNC10	214.443
TNC10	352.29
TNC10	268.173
TNC10	187.375
TNC10	188.528
TNC10	167.854
TNC10	96.189
TNC10	132.377
TNC10	419.278
TNC10	218.593
TNC10	81.718
TNC10	457.59

## Sheet: Fig10 supp1 d
Type	Number of neurites
Control	2
Control	1
Control	4
Control	4
Control	3
Control	2
Control	3
Control	3
Control	2
Control	2
Control	2
Control	3
Control	4
Control	3
Control	2
Control	2
Control	2
Control	3
Control	3
Control	2
Control	2
Control	2
Control	2
Control	2
Control	0
Control	3
Control	2
Control	3
Control	3
Control	1
Control	4
Control	3
Control	3
Control	1
Control	3
Control	4
Control	2
Control	2
Control	2
Control	3
Control	2
Control	3
Control	3
Control	3
Control	3
Control	5
Control	4
Control	4
Control	3
Control	2
Control	4
Control	2
Control	2
Control	2
Control	2
Control	3
Control	2
Control	4
Control	2
Control	2
Control	3
Control	3
Control	1
Control	2
Control	2
Control	4
Control	2
Control	4
Control	3
Control	4
Control	3
Control	3
Control	4
Control	2
Control	3
Control	1
Control	3
Control	3
HA	2
HA	5
HA	3
HA	3
HA	4
HA	4
HA	2
HA	3
HA	4
HA	5
HA	2
HA	3
HA	2
HA	2
HA	2
HA	3
HA	3
HA	3
HA	2
HA	3
HA	2
HA	3
HA	3
HA	3
HA	2
HA	1
HA	4
HA	2
HA	4
HA	2
HA	0
HA	2
HA	2
HA	3
HA	4
HA	2
HA	2
HA	2
HA	2
HA	2
HA	4
HA	5
HA	4
HA	4
HA	3
HA	5
HA	3
HA	2
HA	2
HA	3
HA	2
HA	3
HA	2
HA	3
HA	2
NCAN	5
NCAN	4
NCAN	2
NCAN	3
NCAN	3
NCAN	3
NCAN	2
NCAN	2
NCAN	3
NCAN	2
NCAN	4
NCAN	4
NCAN	2
NCAN	2
NCAN	3
NCAN	2
NCAN	3
NCAN	2
NCAN	4
NCAN	2
NCAN	2
NCAN	3
NCAN	1
NCAN	2
NCAN	2
NCAN	3
NCAN	3
NCAN	2
NCAN	2
NCAN	2
NCAN	2
NCAN	3
NCAN	4
NCAN	2
NCAN	2
NCAN	2
NCAN	0
NCAN	4
NCAN	3
NCAN	2
NCAN	2
NCAN	3
NCAN	2
NCAN	2
NCAN	2
NCAN	3
NCAN	3
NCAN	1
NCAN	3
NCAN	3
NCAN	3
NCAN	3
NCAN	3
NCAN	2
NCAN	1
NCAN	2
NCAN	4
NCAN	2
NCAN	3
NCAN	3
NCAN	2
NCAN	2
NCAN	3
NCAN	2
NCAN	4
TNC0.1	3
TNC0.1	3
TNC0.1	2
TNC0.1	3
TNC0.1	1
TNC0.1	2
TNC0.1	2
TNC0.1	3
TNC0.1	2
TNC0.1	2
TNC0.1	4
TNC0.1	2
TNC0.1	3
TNC0.1	5
TNC0.1	4
TNC0.1	2
TNC0.1	3
TNC0.1	3
TNC0.1	3
TNC0.1	1
TNC0.1	3
TNC0.1	0
TNC0.1	2
TNC0.1	3
TNC0.1	3
TNC0.1	3
TNC0.1	4
TNC0.1	2
TNC0.1	3
TNC0.1	2
TNC0.1	2
TNC0.1	3
TNC0.1	4
TNC0.1	2
TNC0.1	2
TNC0.1	2
TNC0.1	3
TNC0.1	2
TNC0.1	3
TNC0.1	2
TNC0.1	2
TNC0.1	3
TNC0.1	2
TNC0.1	3
TNC0.1	3
TNC0.1	3
TNC0.1	3
TNC0.1	2
TNC0.1	2
TNC0.1	3
TNC0.1	3
TNC0.1	2
TNC0.1	2
TNC0.1	2
TNC0.1	2
TNC1.0	3
TNC1.0	2
TNC1.0	3
TNC1.0	1
TNC1.0	2
TNC1.0	3
TNC1.0	3
TNC1.0	4
TNC1.0	2
TNC1.0	4
TNC1.0	3
TNC1.0	1
TNC1.0	2
TNC1.0	3
TNC1.0	4
TNC1.0	2
TNC1.0	2
TNC1.0	2
TNC1.0	3
TNC1.0	2
TNC1.0	3
TNC1.0	4
TNC1.0	3
TNC1.0	4
TNC1.0	3
TNC1.0	3
TNC1.0	2
TNC1.0	3
TNC1.0	4
TNC1.0	2
TNC1.0	2
TNC1.0	2
TNC1.0	2
TNC1.0	3
TNC1.0	3
TNC1.0	3
TNC1.0	2
TNC1.0	2
TNC1.0	4
TNC1.0	3
TNC1.0	2
TNC1.0	2
TNC1.0	3
TNC1.0	3
TNC1.0	2
TNC1.0	3
TNC1.0	3
TNC1.0	2
TNC1.0	2
TNC1.0	4
TNC1.0	2
TNC1.0	2
TNC1.0	1
TNC1.0	3
TNC1.0	4
TNC1.0	4
TNC1.0	4
TNC1.0	3
TNC1.0	3
TNC1.0	2
TNC1.0	4
TNC1.0	3
TNC1.0	2
TNC1.0	3
TNC1.0	2
TNC1.0	3
TNC10	3
TNC10	3
TNC10	3
TNC10	2
TNC10	3
TNC10	2
TNC10	4
TNC10	3
TNC10	4
TNC10	2
TNC10	3
TNC10	2
TNC10	3
TNC10	4
TNC10	2
TNC10	2
TNC10	2
TNC10	3
TNC10	2
TNC10	3
TNC10	3
TNC10	3
TNC10	3
TNC10	2
TNC10	3
TNC10	3
TNC10	3
TNC10	3
TNC10	2
TNC10	3
TNC10	3
TNC10	4
TNC10	4
TNC10	2
TNC10	4
TNC10	2
TNC10	3
TNC10	3
TNC10	2
TNC10	2
TNC10	3
TNC10	4
TNC10	4
TNC10	4
TNC10	2
TNC10	4
TNC10	4
TNC10	3
TNC10	4
TNC10	4
TNC10	4
TNC10	2
TNC10	3
TNC10	3
TNC10	2
TNC10	2
TNC10	4
TNC10	3
TNC10	5
TNC10	5
TNC10	5
TNC10	4
TNC10	2
TNC10	3
TNC10	2
TNC10	2
TNC10	4
TNC10	3
TNC10	3
TNC10	2
