# Supplementary material for: Assembly of neuron- and radial glial-cell-derived extracellular matrix molecules promotes radial migration of developing cortical neurons
Source: eLife journal article supplement (doi:10.7554/elife.92342), 2023-11-09
Supplement: fig10-figsupp2-data1 [file Numerical source data for Figure 10-figure supplement 2.xlsx]

## Sheet: Fig10 supp2 b
Type	Length of the longest neurite
Control	405.304
Control	121.498
Control	184.054
Control	67.9706
Control	121.983
Control	65.0416
Control	284.735
Control	66.4558
Control	111.983
Control	134.397
Control	126.468
Control	66.3553
Control	156.439
Control	102.77
Control	203.953
Control	335.978
Control	59.5563
Control	204.196
Control	88.2548
Control	184.267
Control	157.267
Control	126.498
Control	125.184
Control	400.031
Control	215.995
Control	53.2132
Control	76.6985
Control	112.669
Control	191.539
Control	101.87
Control	147.811
Control	151.953
Control	157.539
Control	72.3553
Control	156.539
Control	389.446
Control	38.5563
Control	243.681
Control	286.622
Control	75.2548
Control	200.823
Control	155.125
Control	162.74
Control	286.037
Control	181.238
Control	301.321
Control	68.1838
Control	44.3848
Control	27.1421
Control	430.907
Control	405.333
Control	395.061
Control	60.4264
Control	149.196
HA	209.681
HA	63.7279
HA	87.6985
HA	129.669
HA	85.3553
HA	30.7279
HA	225.338
HA	276.936
HA	276.421
HA	132.397
HA	113.255
HA	48.4558
HA	186.196
HA	216.167
HA	67.8406
HA	417.333
HA	75.598
HA	314.706
HA	281.894
HA	60.8701
HA	37.799
HA	52.6985
HA	109.841
HA	58.2132
HA	216.338
HA	30.5563
HA	69.598
HA	50.4558
HA	28.8995
HA	89.8701
HA	70.598
HA	84.0833
HA	169.368
HA	78.4264
HA	62.2843
HA	75.6274
HA	70.0416
HA	42.8701
HA	46.3848
HA	60.3848
HA	64.2843
HA	127.912
HA	38.4558
NCAN	117.154
NCAN	431.262
NCAN	78.669
NCAN	139.782
NCAN	247.38
NCAN	211.924
NCAN	137.983
NCAN	40.6274
NCAN	43.8995
NCAN	45.9706
NCAN	328.693
NCAN	118.74
NCAN	75.5269
NCAN	66.9411
NCAN	76.7696
NCAN	143.953
NCAN	58.7696
NCAN	59.1127
NCAN	142.569
NCAN	71.6985
NCAN	377.12
NCAN	357.948
NCAN	87.669
NCAN	316.735
NCAN	155.983
NCAN	294.037
NCAN	117.698
NCAN	247.794
NCAN	143.711
NCAN	430.73
NCAN	372.291
NCAN	198.439
NCAN	36.3848
NCAN	161.083
NCAN	40.5563
NCAN	236.681
NCAN	253.409
NCAN	162.539
NCAN	89.8406
NCAN	71.598
NCAN	109.912
NCAN	161.297
NCAN	179.338
NCAN	130.426
NCAN	236.48
NCAN	126.296
NCAN	129.498
NCAN	426.961
NCAN	208.238
NCAN	182.953
NCAN	56.2132
NCAN	34.8701
NCAN	231.794
NCAN	262.451
NCAN	48.2132
NCAN	39.5563
NCAN	235.936
NCAN	233.451
NCAN	180.196
NCAN	250.752
NCAN	233.125
NCAN	419.233
NCAN	119.054
NCAN	165.61
NCAN	62.2132
NCAN	88.6985
NCAN	25.1421
NCAN	46.2132
NCAN	127.397
NCAN	181.024
NCAN	42.9706
NCAN	140.953
NCAN	116.569
NCAN	92.3553
NCAN	243.894
NCAN	47.7279
TNC ０.1	136.598
TNC ０.1	70.2843
TNC ０.1	274.137
TNC ０.1	82.799
TNC ０.1	142.297
TNC ０.1	198.439
TNC ０.1	165.64
TNC ０.1	66.0416
TNC ０.1	149.439
TNC ０.1	341.706
TNC ０.1	109.255
TNC ０.1	76.0122
TNC ０.1	218.995
TNC ０.1	213.652
TNC ０.1	210.095
TNC ０.1	331.321
TNC ０.1	235.965
TNC ０.1	126.397
TNC ０.1	112.326
TNC ０.1	314.108
TNC ０.1	363.563
TNC ０.1	373.404
TNC ０.1	482.446
TNC ０.1	383.179
TNC ０.1	174.439
TNC ０.1	162.61
TNC ０.1	635.701
TNC ０.1	107.669
TNC ０.1	205.794
TNC ０.1	67.9411
TNC ０.1	444.12
TNC ０.1	420.889
TNC ０.1	297.764
TNC ０.1	83.4264
TNC ０.1	178.882
TNC ０.1	107.498
TNC ０.1	208.51
TNC ０.1	129.569
TNC ０.1	181.154
TNC ０.1	195.782
TNC ０.1	42.5563
TNC ０.1	72.5269
TNC ０.1	70.0122
TNC ０.1	160.125
TNC ０.1	67.2843
TNC ０.1	93.2548
TNC ０.1	214.551
TNC ０.1	300.907
TNC ０.1	219.924
TNC ０.1	162.439
TNC ０.1	220.309
TNC ０.1	112.154
TNC ０.1	291.48
TNC ０.1	110.397
TNC ０.1	358.291
TNC ０.1	93.669
TNC ０.1	273.936
TNC ０.1	486.63
TNC ０.1	53.2132
TNC ０.1	64.3259
TNC ０.1	95.8406
TNC ０.1	142.225
TNC ０.1	73.0833
TNC １.0	406.404
TNC １.0	169.326
TNC １.0	266.936
TNC １.0	284.794
TNC １.0	283.108
TNC １.0	105.054
TNC １.0	426.505
TNC １.0	360.848
TNC １.0	133.64
TNC １.0	147.983
TNC １.0	295.25
TNC １.0	280.752
TNC １.0	97.397
TNC １.0	52.0416
TNC １.0	378.108
TNC １.0	254.48
TNC １.0	205.338
TNC １.0	245.48
TNC １.0	99.0538
TNC １.0	170.095
TNC １.0	41.799
TNC １.0	410.676
TNC １.0	112.012
TNC １.0	65.2843
TNC １.0	25.7279
TNC １.0	302.38
TNC １.0	69.1127
TNC １.0	245.894
TNC １.0	71.8406
TNC １.0	104.154
TNC １.0	211.723
TNC １.0	144.054
TNC １.0	184.74
TNC １.0	173.167
TNC １.0	93.0122
TNC １.0	392.806
TNC １.0	89.1838
TNC １.0	70.5269
TNC １.0	179.953
TNC １.0	116.184
TNC １.0	100.627
TNC １.0	136.882
TNC 10	302.735
TNC 10	313.191
TNC 10	174.711
TNC 10	195.652
TNC 10	460.777
TNC 10	502.801
TNC 10	256.622
TNC 10	237.823
TNC 10	77.2843
TNC 10	63.1838
TNC 10	40.3848
TNC 10	49.2843
TNC 10	323.22
TNC 10	229.208
TNC 10	474.777
TNC 10	246.823
TNC 10	125.64
TNC 10	105.74
TNC 10	321.25
TNC 10	327.877
TNC 10	451.433
TNC 10	471.031
TNC 10	82.1838
TNC 10	309.108
TNC 10	459.475
TNC 10	193.782
TNC 10	273.492
TNC 10	307.652
TNC 10	127.054
TNC 10	57.0416

## Sheet: Fig10 supp2 c
Type	Total length of neurites
Control	483.002
Control	147.811
Control	309.965
Control	122.598
Control	156.539
Control	92.3553
Control	306.978
Control	157.296
Control	245.522
Control	292.563
Control	215.48
Control	178.137
Control	318.363
Control	173.539
Control	483.588
Control	548.387
Control	151.326
Control	340.664
Control	190.095
Control	315.836
Control	428.546
Control	200.095
Control	180.326
Control	475.458
Control	427.919
Control	157.196
Control	76.6985
Control	226.581
Control	263.137
Control	260.066
Control	296.664
Control	264.108
Control	464.517
Control	200.894
Control	267.622
Control	553.955
Control	124.196
Control	302.723
Control	506.83
Control	179.581
Control	325.635
Control	204.439
Control	446.333
Control	392.291
Control	305.978
Control	317.149
Control	220.652
Control	44.3848
Control	68.87
Control	470.049
Control	538.629
Control	452.073
Control	114.468
Control	399.718
HA	372.049
HA	209.711
HA	442.777
HA	279.593
HA	85.3553
HA	52.799
HA	225.338
HA	302.321
HA	467.002
HA	156.054
HA	410.919
HA	48.4558
HA	412.576
HA	292.522
HA	164.61
HA	643.014
HA	163.953
HA	456.759
HA	485.546
HA	182.368
HA	87.598
HA	114.983
HA	185.61
HA	107.598
HA	275.551
HA	76.7695
HA	151.468
HA	132.054
HA	72.87
HA	152.64
HA	70.598
HA	252.22
HA	306.563
HA	216.995
HA	109.498
HA	126.598
HA	124.74
HA	77.2549
HA	103.527
HA	194.267
HA	117.498
HA	167.882
HA	89.5685
NCAN	327.362
NCAN	593.801
NCAN	134.64
NCAN	181.894
NCAN	301.078
NCAN	335.907
NCAN	395.191
NCAN	68.669
NCAN	108.769
NCAN	93.1127
NCAN	410.635
NCAN	234.995
NCAN	103.498
NCAN	160.711
NCAN	151.297
NCAN	343.362
NCAN	127.953
NCAN	237.823
NCAN	500.747
NCAN	209.338
NCAN	425.333
NCAN	435.475
NCAN	213.622
NCAN	449.031
NCAN	294.35
NCAN	422.434
NCAN	376.078
NCAN	374.291
NCAN	220.823
NCAN	481.772
NCAN	372.291
NCAN	544.73
NCAN	83.1838
NCAN	265.752
NCAN	117.326
NCAN	385.392
NCAN	383.735
NCAN	315.907
NCAN	266.907
NCAN	187.095
NCAN	281.563
NCAN	329.007
NCAN	369.848
NCAN	232.853
NCAN	378.362
NCAN	415.103
NCAN	328.279
NCAN	557.044
NCAN	273.865
NCAN	361.906
NCAN	175.296
NCAN	128.539
NCAN	497.416
NCAN	390.019
NCAN	195.924
NCAN	59.87
NCAN	456.446
NCAN	285.664
NCAN	357.291
NCAN	526.889
NCAN	323.48
NCAN	419.233
NCAN	370.333
NCAN	265.35
NCAN	281.421
NCAN	135.326
NCAN	48.4558
NCAN	86.7401
NCAN	233.965
NCAN	315.078
NCAN	58.2843
NCAN	397.475
NCAN	336.522
NCAN	300.078
NCAN	477.659
NCAN	90.6274
TNC ０.1	315.966
TNC ０.1	273.35
TNC ０.1	367.392
TNC ０.1	196.782
TNC ０.1	263.693
TNC ０.1	252.965
TNC ０.1	261.409
TNC ０.1	151.296
TNC ０.1	268.693
TNC ０.1	494.617
TNC ０.1	134.983
TNC ０.1	232.179
TNC ０.1	466.416
TNC ０.1	308.179
TNC ０.1	453.404
TNC ０.1	553.801
TNC ０.1	401.333
TNC ０.1	222.723
TNC ０.1	225.338
TNC ０.1	408.747
TNC ０.1	432.433
TNC ０.1	457.174
TNC ０.1	502.688
TNC ０.1	493.019
TNC ０.1	408.161
TNC ０.1	336.534
TNC ０.1	723.47
TNC ０.1	182.267
TNC ０.1	302.563
TNC ０.1	185.752
TNC ０.1	569.345
TNC ０.1	479.416
TNC ０.1	545.961
TNC ０.1	145.054
TNC ０.1	351.635
TNC ０.1	162.51
TNC ０.1	247.894
TNC ０.1	284.179
TNC ０.1	232.782
TNC ０.1	351.392
TNC ０.1	176.639
TNC ０.1	179.338
TNC ０.1	132.711
TNC ０.1	361.635
TNC ０.1	107.598
TNC ０.1	142.225
TNC ０.1	378.161
TNC ０.1	507.073
TNC ０.1	585.073
TNC ０.1	234.965
TNC ０.1	401.546
TNC ０.1	195.581
TNC ０.1	337.836
TNC ０.1	315.392
TNC ０.1	450.718
TNC ０.1	182.095
TNC ０.1	294.492
TNC ０.1	559.257
TNC ０.1	189.924
TNC ０.1	288.563
TNC ０.1	148.882
TNC ０.1	514.759
TNC ０.1	89.1544
TNC １.0	548.357
TNC １.0	266.137
TNC １.0	453.961
TNC １.0	351.25
TNC １.0	535.073
TNC １.0	143.752
TNC １.0	572.286
TNC １.0	485.659
TNC １.0	242.238
TNC １.0	237.137
TNC １.0	365.706
TNC １.0	442.635
TNC １.0	316.049
TNC １.0	117.296
TNC １.0	378.108
TNC １.0	381.262
TNC １.0	321.907
TNC １.0	568.701
TNC １.0	238.137
TNC １.0	314.25
TNC １.0	82.6985
TNC １.0	470.688
TNC １.0	187.782
TNC １.0	185.882
TNC １.0	69.6985
TNC １.0	364.007
TNC １.0	159.64
TNC １.0	522.588
TNC １.0	162.238
TNC １.0	223.652
TNC １.0	389.375
TNC １.0	523.215
TNC １.0	306.024
TNC １.0	245.179
TNC １.0	279.208
TNC １.0	560.487
TNC １.0	292.764
TNC １.0	260.108
TNC １.0	259.166
TNC １.0	170.054
TNC １.0	218.853
TNC １.0	315.907
TNC 10	398.404
TNC 10	534.441
TNC 10	279.995
TNC 10	408.161
TNC 10	562.789
TNC 10	1198.47
TNC 10	373.434
TNC 10	320.936
TNC 10	154.64
TNC 10	222.694
TNC 10	154.297
TNC 10	90.3554
TNC 10	535.215
TNC 10	546.872
TNC 10	740.227
TNC 10	461.617
TNC 10	318.35
TNC 10	231.894
TNC 10	359.392
TNC 10	479.902
TNC 10	921.566
TNC 10	520.588
TNC 10	254.894
TNC 10	445.161
TNC 10	518.76
TNC 10	727.938
TNC 10	402.303
TNC 10	541.558
TNC 10	430.291
TNC 10	190.338

## Sheet: Fig10 supp2 d
Type	Number of neurites
Control	3
Control	2
Control	4
Control	3
Control	3
Control	2
Control	2
Control	3
Control	4
Control	5
Control	3
Control	6
Control	6
Control	2
Control	6
Control	5
Control	4
Control	5
Control	3
Control	5
Control	4
Control	4
Control	2
Control	3
Control	4
Control	5
Control	1
Control	3
Control	3
Control	4
Control	3
Control	3
Control	4
Control	3
Control	4
Control	4
Control	4
Control	2
Control	4
Control	4
Control	2
Control	3
Control	6
Control	4
Control	3
Control	2
Control	5
Control	1
Control	3
Control	3
Control	5
Control	3
Control	2
Control	5
HA	5
HA	4
HA	7
HA	4
HA	1
HA	2
HA	1
HA	2
HA	6
HA	2
HA	8
HA	1
HA	5
HA	2
HA	3
HA	6
HA	5
HA	4
HA	5
HA	4
HA	3
HA	3
HA	2
HA	3
HA	3
HA	3
HA	4
HA	4
HA	3
HA	3
HA	1
HA	5
HA	4
HA	4
HA	2
HA	3
HA	3
HA	2
HA	3
HA	5
HA	3
HA	3
HA	3
NCAN	5
NCAN	5
NCAN	2
NCAN	2
NCAN	3
NCAN	5
NCAN	5
NCAN	2
NCAN	3
NCAN	3
NCAN	3
NCAN	5
NCAN	2
NCAN	3
NCAN	3
NCAN	5
NCAN	3
NCAN	6
NCAN	7
NCAN	5
NCAN	2
NCAN	3
NCAN	5
NCAN	4
NCAN	4
NCAN	4
NCAN	5
NCAN	4
NCAN	2
NCAN	3
NCAN	1
NCAN	4
NCAN	3
NCAN	4
NCAN	3
NCAN	4
NCAN	5
NCAN	5
NCAN	5
NCAN	5
NCAN	4
NCAN	6
NCAN	4
NCAN	5
NCAN	5
NCAN	6
NCAN	4
NCAN	6
NCAN	4
NCAN	5
NCAN	6
NCAN	4
NCAN	6
NCAN	5
NCAN	6
NCAN	2
NCAN	4
NCAN	3
NCAN	5
NCAN	5
NCAN	3
NCAN	1
NCAN	6
NCAN	2
NCAN	6
NCAN	3
NCAN	2
NCAN	2
NCAN	3
NCAN	4
NCAN	2
NCAN	4
NCAN	3
NCAN	6
NCAN	5
NCAN	2
TNC ０.1	7
TNC ０.1	6
TNC ０.1	4
TNC ０.1	3
TNC ０.1	3
TNC ０.1	2
TNC ０.1	4
TNC ０.1	5
TNC ０.1	4
TNC ０.1	5
TNC ０.1	2
TNC ０.1	4
TNC ０.1	4
TNC ０.1	3
TNC ０.1	7
TNC ０.1	3
TNC ０.1	4
TNC ０.1	3
TNC ０.1	4
TNC ０.1	3
TNC ０.1	3
TNC ０.1	3
TNC ０.1	2
TNC ０.1	4
TNC ０.1	6
TNC ０.1	3
TNC ０.1	4
TNC ０.1	3
TNC ０.1	4
TNC ０.1	5
TNC ０.1	4
TNC ０.1	2
TNC ０.1	4
TNC ０.1	2
TNC ０.1	4
TNC ０.1	2
TNC ０.1	2
TNC ０.1	4
TNC ０.1	3
TNC ０.1	5
TNC ０.1	5
TNC ０.1	4
TNC ０.1	4
TNC ０.1	5
TNC ０.1	2
TNC ０.1	2
TNC ０.1	5
TNC ０.1	5
TNC ０.1	6
TNC ０.1	3
TNC ０.1	3
TNC ０.1	3
TNC ０.1	2
TNC ０.1	6
TNC ０.1	5
TNC ０.1	2
TNC ０.1	2
TNC ０.1	4
TNC ０.1	6
TNC ０.1	7
TNC ０.1	2
TNC ０.1	7
TNC ０.1	2
TNC １.0	4
TNC １.0	3
TNC １.0	3
TNC １.0	3
TNC １.0	5
TNC １.0	2
TNC １.0	4
TNC １.0	5
TNC １.0	4
TNC １.0	3
TNC １.0	2
TNC １.0	6
TNC １.0	5
TNC １.0	3
TNC １.0	1
TNC １.0	5
TNC １.0	3
TNC １.0	6
TNC １.0	4
TNC １.0	2
TNC １.0	3
TNC １.0	4
TNC １.0	3
TNC １.0	4
TNC １.0	3
TNC １.0	2
TNC １.0	4
TNC １.0	5
TNC １.0	5
TNC １.0	4
TNC １.0	5
TNC １.0	4
TNC １.0	3
TNC １.0	4
TNC １.0	5
TNC １.0	3
TNC １.0	5
TNC １.0	6
TNC １.0	2
TNC １.0	3
TNC １.0	3
TNC １.0	4
TNC 10	3
TNC 10	4
TNC 10	4
TNC 10	4
TNC 10	4
TNC 10	8
TNC 10	4
TNC 10	4
TNC 10	4
TNC 10	5
TNC 10	5
TNC 10	2
TNC 10	6
TNC 10	9
TNC 10	5
TNC 10	3
TNC 10	7
TNC 10	3
TNC 10	3
TNC 10	3
TNC 10	6
TNC 10	3
TNC 10	4
TNC 10	5
TNC 10	3
TNC 10	6
TNC 10	3
TNC 10	4
TNC 10	5
TNC 10	4
