# Supplementary material for: Assembly of neuron- and radial glial-cell-derived extracellular matrix molecules promotes radial migration of developing cortical neurons
Source: eLife journal article supplement (doi:10.7554/elife.92342), 2023-11-09
Supplement: fig10-figsupp3-data1 [file Numerical source data for Figure 10-figure supplement 3.xlsx]

## Sheet: Fig10 supp3 b
Type	Length of the longest neurite
WT	135.711
WT	50.5563
WT	240.38
WT	69.2132
WT	76.2132
WT	136.912
WT	84.598
WT	228.681
WT	412.961
WT	381.718
WT	364.433
WT	36.6274
WT	53.9706
WT	118.498
WT	55.799
WT	108.426
WT	128.426
WT	266.924
WT	366.363
WT	405.463
WT	69.2843
WT	97.3259
WT	98.1838
WT	58.0416
WT	207.752
WT	36.9706
WT	91.5269
WT	71.7696
WT	32.4853
WT	283.551
WT	297.551
WT	472.446
WT	26.5563
WT	104.983
WT	544.085
WT	66.8701
WT	106.184
WT	86.5269
WT	296.593
WT	134.083
WT	120.711
WT	49.2843
WT	84.0122
WT	31.4853
WT	334.706
WT	35.8995
WT	104.225
WT	55.8701
WT	322.161
WT	114.569
WT	66.4558
WT	138.154
WT	210.782
WT	194.681
WT	63.669
WT	150.953
WT	143.468
WT	57.6985
WT	51.2843
WT	133.326
WT	124.912
WT	150.297
WT	148.368
WT	148.297
WT	90.4264
WT	187.368
WT	43.2132
WT	214.338
WT	128.083
WT	75.1838
WT	82.669
WT	300.492
WT	298.706
WT	360.22
WT	334.191
WT	81.9411
WT	40.9706
WT	111.912
WT	217.196
WT	42.6274
NCAN KO	48.0416
NCAN KO	376.392
NCAN KO	93.0122
NCAN KO	49.7279
NCAN KO	58.4558
NCAN KO	135.64
NCAN KO	60.0416
NCAN KO	57.4558
NCAN KO	55.2843
NCAN KO	101.569
NCAN KO	57.1838
NCAN KO	38.3848
NCAN KO	68.0416
NCAN KO	72.0122
NCAN KO	67.4264
NCAN KO	93.9411
NCAN KO	202.066
NCAN KO	67.8701
NCAN KO	50.799
NCAN KO	57.1127
NCAN KO	96.9828
NCAN KO	58.6274
NCAN KO	93.397
NCAN KO	96.598
NCAN KO	245.894
NCAN KO	112.983
NCAN KO	183.782
NCAN KO	45.3137
NCAN KO	39.9706
NCAN KO	67.1838
NCAN KO	106.811
NCAN KO	169.238
NCAN KO	82.598
NCAN KO	31.3848
NCAN KO	183.267
NCAN KO	210.409
NCAN KO	76.1127
NCAN KO	56.5269
NCAN KO	48.0416
NCAN KO	41.6985
NCAN KO	34.5563
NCAN KO	47.2132
NCAN KO	77.9411
NCAN KO	167.196
NCAN KO	28.8995
NCAN KO	36.5563
NCAN KO	20.4853
NCAN KO	112.184
NCAN KO	87.1838
NCAN KO	217.865
NCAN KO	59.2843
NCAN KO	42.1421
NCAN KO	197.51
NCAN KO	212.581
NCAN KO	240.551
NCAN KO	157.953
NCAN KO	142.368
NCAN KO	65.6985
NCAN KO	50.0416
NCAN KO	69.9706
NCAN KO	80.669
NCAN KO	60.7696
NCAN KO	58.9706
NCAN KO	77.0833
NCAN KO	94.8406
NCAN KO	68.9706
NCAN KO	46.7279
NCAN KO	98.9117
NCAN KO	89.4264
NCAN KO	34.3848

## Sheet: Fig10 supp3 c
Type	Total length of neurites
WT	200.066
WT	70.6274
WT	314.593
WT	94.6985
WT	125.426
WT	348.291
WT	111.498
WT	247.581
WT	487.002
WT	413.345
WT	364.433
WT	91.6691
WT	82.1127
WT	194.924
WT	76.5269
WT	193.095
WT	199.296
WT	295.652
WT	391.505
WT	460.262
WT	143.64
WT	149.51
WT	144.569
WT	103.326
WT	290.007
WT	69.7696
WT	158.125
WT	131.225
WT	75.0417
WT	319.522
WT	420.392
WT	489.688
WT	85.9116
WT	306.434
WT	566.985
WT	135.468
WT	322.806
WT	212.267
WT	367.191
WT	278.137
WT	284.593
WT	106.468
WT	113.326
WT	77.9411
WT	505.517
WT	94.3554
WT	185.723
WT	90.8407
WT	379.103
WT	290.836
WT	164.61
WT	211.439
WT	309.179
WT	194.681
WT	154.166
WT	260.208
WT	175.61
WT	110.598
WT	122.64
WT	273.137
WT	159.225
WT	171.196
WT	148.368
WT	241.622
WT	119.569
WT	332.392
WT	58.5269
WT	279.936
WT	175.711
WT	75.1838
WT	204.439
WT	395.747
WT	379.303
WT	379.635
WT	391.404
WT	102.083
WT	58.8701
WT	127.983
WT	236.51
WT	76.1127
NCAN KO	109.225
NCAN KO	598.458
NCAN KO	162.681
NCAN KO	98.4558
NCAN KO	88.5979
NCAN KO	255.865
NCAN KO	99.6985
NCAN KO	181.51
NCAN KO	179.238
NCAN KO	264.007
NCAN KO	142.782
NCAN KO	81.4264
NCAN KO	99.0122
NCAN KO	214.409
NCAN KO	152.752
NCAN KO	163.468
NCAN KO	274.35
NCAN KO	134.397
NCAN KO	86.6985
NCAN KO	134.539
NCAN KO	195.137
NCAN KO	82.1127
NCAN KO	195.108
NCAN KO	306.434
NCAN KO	385.333
NCAN KO	112.983
NCAN KO	314.179
NCAN KO	115.426
NCAN KO	111.841
NCAN KO	321.99
NCAN KO	257.451
NCAN KO	401.262
NCAN KO	280.693
NCAN KO	76.527
NCAN KO	294.007
NCAN KO	263.693
NCAN KO	128.154
NCAN KO	151.811
NCAN KO	86.0122
NCAN KO	60.7696
NCAN KO	89.8406
NCAN KO	47.2132
NCAN KO	292.35
NCAN KO	189.681
NCAN KO	45.799
NCAN KO	70.87
NCAN KO	37.799
NCAN KO	314.137
NCAN KO	156.711
NCAN KO	289.049
NCAN KO	156.125
NCAN KO	42.1421
NCAN KO	222.409
NCAN KO	268.451
NCAN KO	382.777
NCAN KO	349.321
NCAN KO	300.563
NCAN KO	104.498
NCAN KO	122.882
NCAN KO	100.941
NCAN KO	106.811
NCAN KO	181.652
NCAN KO	134.083
NCAN KO	140.539
NCAN KO	184.439
NCAN KO	149.125
NCAN KO	101.184
NCAN KO	190.167
NCAN KO	156.125
NCAN KO	68.598

## Sheet: Fig10 supp3 d
Type	Number of neurites
WT	3
WT	2
WT	4
WT	2
WT	2
WT	4
WT	2
WT	2
WT	4
WT	2
WT	1
WT	3
WT	2
WT	4
WT	2
WT	3
WT	3
WT	2
WT	2
WT	3
WT	3
WT	2
WT	3
WT	2
WT	3
WT	2
WT	3
WT	2
WT	3
WT	3
WT	3
WT	2
WT	4
WT	4
WT	2
WT	4
WT	6
WT	5
WT	4
WT	4
WT	5
WT	3
WT	2
WT	3
WT	4
WT	4
WT	2
WT	3
WT	3
WT	4
WT	4
WT	3
WT	4
WT	1
WT	4
WT	4
WT	2
WT	2
WT	3
WT	3
WT	2
WT	2
WT	1
WT	4
WT	2
WT	4
WT	2
WT	3
WT	2
WT	1
WT	4
WT	3
WT	4
WT	2
WT	3
WT	2
WT	2
WT	2
WT	2
WT	3
NCAN KO	3
NCAN KO	4
NCAN KO	4
NCAN KO	2
NCAN KO	2
NCAN KO	4
NCAN KO	2
NCAN KO	6
NCAN KO	6
NCAN KO	5
NCAN KO	4
NCAN KO	3
NCAN KO	2
NCAN KO	4
NCAN KO	3
NCAN KO	3
NCAN KO	3
NCAN KO	3
NCAN KO	3
NCAN KO	3
NCAN KO	3
NCAN KO	2
NCAN KO	4
NCAN KO	6
NCAN KO	5
NCAN KO	1
NCAN KO	6
NCAN KO	4
NCAN KO	4
NCAN KO	8
NCAN KO	5
NCAN KO	4
NCAN KO	5
NCAN KO	3
NCAN KO	4
NCAN KO	3
NCAN KO	3
NCAN KO	3
NCAN KO	2
NCAN KO	2
NCAN KO	3
NCAN KO	1
NCAN KO	7
NCAN KO	2
NCAN KO	2
NCAN KO	2
NCAN KO	2
NCAN KO	5
NCAN KO	4
NCAN KO	4
NCAN KO	4
NCAN KO	1
NCAN KO	2
NCAN KO	2
NCAN KO	3
NCAN KO	6
NCAN KO	3
NCAN KO	3
NCAN KO	3
NCAN KO	2
NCAN KO	2
NCAN KO	4
NCAN KO	3
NCAN KO	4
NCAN KO	2
NCAN KO	4
NCAN KO	4
NCAN KO	5
NCAN KO	3
NCAN KO	2
