# Supplementary figures and images for: Assembly of neuron- and radial glial-cell-derived extracellular matrix molecules promotes radial migration of developing cortical neurons
Source: eLife journal article supplement (doi:10.7554/elife.92342), 2023-11-09

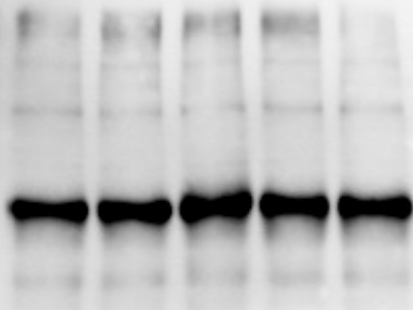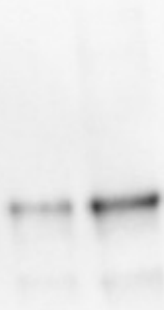

Supplement: fig2-data1 [file elife-92342-fig2-data1-v1.zip]

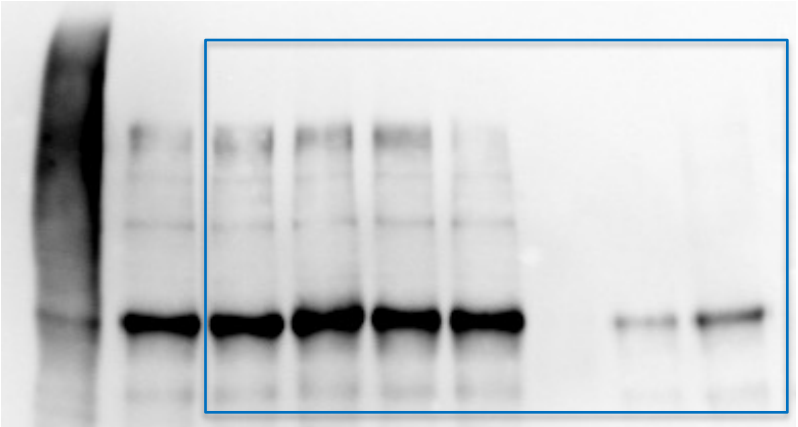

Supplement: fig2-data1 [file elife-92342-fig2-data1-v1.zip]
